# Supplementary material for: Asymmetric alkene–alkene reductive cross-coupling reactionviavisible-light photoredox/cobalt dual catalysis
Source: Royal Society of Chemistry journal article supplement (doi:10.1039/d3cc02792a), 2023-01-01

--- Electronic Supplementary Information---

## **Asymmetric alkene-alkene reductive cross-coupling reaction via visible-light photoredox/cobalt dual catalysis**

Mamata Maiti, Sayan K. Jana and Biplab Maji \*

Department of Chemical Sciences

Indian Institute of Science Education and Research Kolkata

Mohanpur 741246, India

Email: bm@iiserkol.ac.in

### **Table of contents**

|    |                                              |     |
|----|----------------------------------------------|-----|
| 1  | General Information                          | S2  |
| 2  | Detailed Optimization of Reaction Conditions | S3  |
| 3  | General Procedure                            | S6  |
| 4  | Characterization Data of the Products        | S7  |
| 5  | Derivatization of the Products               | S23 |
| 6  | Synthesis of Starting Materials              | S25 |
| 7  | Characterization of Starting Materials       | S28 |
| 8  | Mechanistic Studies                          | S33 |
| 9  | Scale up Experiment                          | S40 |
| 10 | Crystal Data                                 | S41 |
| 11 | Unsuccessful Substrates                      | S42 |
| 12 | Reference                                    | S43 |
| 13 | Copies of NMR Spectra                        | S44 |

## 1. General Information

All the reactions were performed in oven-dried glassware under an argon or nitrogen atmosphere using standard Schlenk techniques. Reaction temperatures are reported as the bath temperature surrounding the vessel unless otherwise stated. Non-halogenated solvents were dried over calcium hydride. All the solvents were degassed with argon and stored over activated molecular sieves (4 Å).

Analytics:  $^1\text{H}$ ,  $^{13}\text{C}$ , and  $^{19}\text{F}$  NMR spectra have been recorded on Bruker ( $^1\text{H}$ : 500 MHz,  $^{13}\text{C}$  { $^1\text{H}$ }: 126 MHz,  $^{19}\text{F}$  { $^1\text{H}$ }: 470 MHz) and JEOL ( $^1\text{H}$ : 400 MHz,  $^{13}\text{C}$  { $^1\text{H}$ }: 101 MHz,  $^{19}\text{F}$  { $^1\text{H}$ }: 376 MHz) and were referenced to the resonances of the solvent used. Multiplicities have been indicated as: br (broad), s (singlet), d (doublet), t (triplet), dd (doublet of doublet), dt (doublet of triplet) or m (multiplet). Coupling constants ( $J$ ) are reported in Hertz (Hz). FT-IR spectra were recorded by Bruker Optics ALPHA II spectrometer with a universal Zn-Se ATR (attenuated total reflection) accessory. Mass spectra were recorded on Bruker micrOTOF-Q II Spectrometer. HPLC was recorded on Waters HPLC with Photodiode Array Detector. Optical rotations were recorded using a 100 mm cell on Anton Paar Polarimeter (MCP 100) and are reported as follows:  $[\alpha]_D^{25}$  (c in g per 1 mL solvent). For thin-layer chromatography (TLC) analysis, Merck pre-coated TLC plates (silica gel 60 F254 0.25 mm) were used, and visualization was accomplished by UV light (254 nm),  $\text{I}_2$ ,  $\text{KMnO}_4$ , and cerium molybdate.

Chemicals: Commercially available chemicals were bought from Sigma–Aldrich, Alfa–Aesar, Avra Synthesis, BLD Pharma, and TCI and used without further purification. Dry solvents were prepared according to the standard procedure and degassed by freeze–pump–thaw cycles prior to use. No attempts were made to optimize yields for substrate, catalyst, and ligand.

## 2. Optimization of the Reaction Conditions:

Table S1. The Effect of the Chiral Ligands<sup>a</sup>

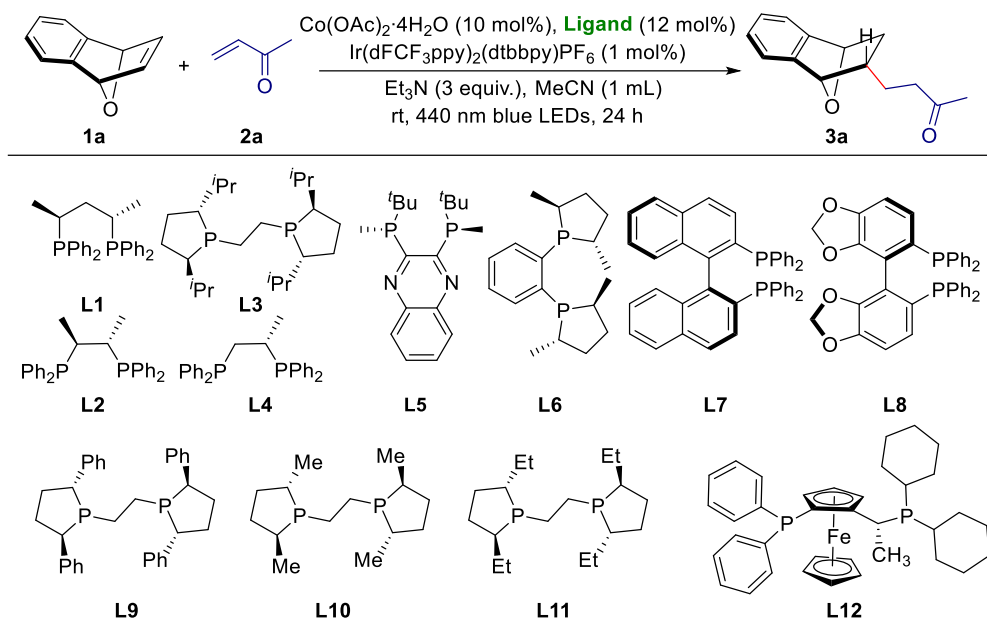

| Entry | Ligand | Yield of <b>3a</b> (%) | Enantiomeric ratio | Diastereomeric ratio |
|-------|--------|------------------------|--------------------|----------------------|
| 1     | L1     | 94                     | 96:4               | >99:1                |
| 2     | L2     | 39                     | 90:10              | >99:1                |
| 3     | L3     | 43                     | 17.2:82.8          | >99:1                |
| 4     | L4     | trace                  | ---                | ---                  |
| 5     | L5     | trace                  | ---                | ---                  |
| 6     | L6     | trace                  | ---                | ---                  |
| 7     | L7     | 27                     | 71.7:28.3          | >99:1                |
| 8     | L8     | 31                     | 49.5:50.5          | >99:1                |
| 9     | L9     | <10                    | ---                | ---                  |
| 10    | L10    | trace                  | ---                | ---                  |
| 11    | L11    | trace                  | ---                | ---                  |
| 12    | L12    | <10                    | ---                | ---                  |

<sup>a</sup>Reaction Conditions: **1a** (0.1 mmol), **2a** (0.5 mmol), Ir(dFCF<sub>3</sub>ppy)<sub>2</sub>(dtbbpy)PF<sub>6</sub> (1 mol%), Co(OAc)<sub>2</sub>·4H<sub>2</sub>O (10 mol%), Ligand (12 mol%), NEt<sub>3</sub> (0.3 mmol), Blue LED (440 nm) in MeCN (1 ml) at room temperature under Ar. Yields and diastereomeric ratios are determined by <sup>1</sup>H NMR analysis using 1,3,5-trimethoxybenzene as an internal standard. Enantiomeric ratios are checked by the chiral HPLC stationary phase column.

**Table S2. The Effect of the Cobalt Salts<sup>a</sup>**
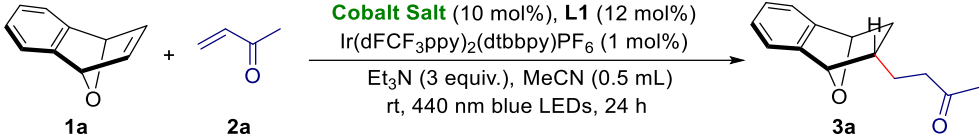

| Entry | Cobalt salt                                | Yield of 3a (%) | Enantiomeric ratio | Diastereomeric ratio |
|-------|--------------------------------------------|-----------------|--------------------|----------------------|
| 1     | CoCl <sub>2</sub>                          | 65              | 95:5               | >99:1                |
| 2     | <b>Co(OAc)<sub>2</sub>·4H<sub>2</sub>O</b> | <b>94</b>       | <b>96:4</b>        | <b>&gt;99:1</b>      |
| 3     | CoBr <sub>2</sub>                          | 17              | 80:20              | >99:1                |
| 4     | Co(acac) <sub>2</sub>                      | 87              | 96:4               | >99:1                |

<sup>a</sup>Reaction Conditions: **1a** (0.1 mmol), **2a** (0.5 mmol), Ir(dFCF<sub>3</sub>ppy)<sub>2</sub>(dtbbpy)PF<sub>6</sub> (1 mol%), Cobalt salt (10 mol%), **L1** (12 mol%), NEt<sub>3</sub> (0.3 mmol), Blue LED (440 nm) in MeCN (1 mL) at room temperature under Ar. Yields and diastereomeric ratios are determined by <sup>1</sup>H NMR analysis using 1,3,5-trimethoxybenzene as an internal standard. Enantiomeric ratios are checked by the chiral HPLC stationary phase column.

**Table S3. The Effect of Electron Donors<sup>a</sup>**
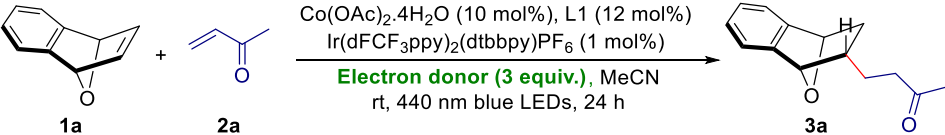

| Entry | Electron donor         | Yield of 3a (%) | Enantiomeric ratio | diastereotiomeric ratio |
|-------|------------------------|-----------------|--------------------|-------------------------|
| 1     | DIPEA                  | 57              | 95.3:4.7           | >99:1                   |
| 2     | <b>Et<sub>3</sub>N</b> | <b>94</b>       | <b>96:4</b>        | <b>&gt;99:1</b>         |
| 3     | Hantzsch ester         | 59              | 95.4:4.6           | >99:1                   |

<sup>a</sup>Reaction Conditions: **1a** (0.1 mmol), **2a** (0.5 mmol), Ir(dFCF<sub>3</sub>ppy)<sub>2</sub>(dtbbpy)PF<sub>6</sub> (1 mol%), Co(OAc)<sub>2</sub>·4H<sub>2</sub>O (10 mol%), **L1** (12 mol%), Electron donor (0.3 mmol), Blue LED (440 nm) in MeCN (1 mL) at room temperature under Ar. Yields and diastereomeric ratios are determined by <sup>1</sup>H NMR analysis using 1,3,5-trimethoxybenzene as an internal standard. Enantiomeric ratios are checked by the chiral HPLC stationary phase column. DIPEA= Diisopropylethylamine.

**Table S4. Thermal reactions in the presence of metallic reductants<sup>a</sup>**
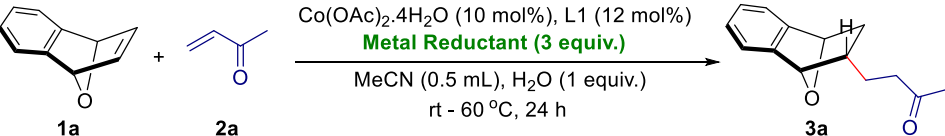

| Entry | Metal Reductant | Yield of 3a (%) | Enantiomeric ratio | diastereotiomeric ratio |
|-------|-----------------|-----------------|--------------------|-------------------------|
| 1     | Zn dust         | 25              | 96:4               | >99:1                   |
| 2     | In powder       | 20              | 96:4               | >99:1                   |
| 3     | Mn flakes       | <5              | -                  | -                       |

<sup>a</sup>Reaction Conditions: **1a** (0.1 mmol), **2a** (0.5 mmol), Metal reductant (0.3 mmol) Co(OAc)<sub>2</sub>·4H<sub>2</sub>O (10 mol%), **L1** (12 mol%), in MeCN (0.5 mL) at rt to 60 °C under Ar. Yields and diastereomeric ratios are determined by <sup>1</sup>H NMR analysis using 1,3,5-trimethoxybenzene

as an internal standard. Enantiomeric ratios are checked by the chiral HPLC stationary phase column.

**Table S5. The Effect of the Photocatalysts and Wavelengths of Light<sup>a</sup>**

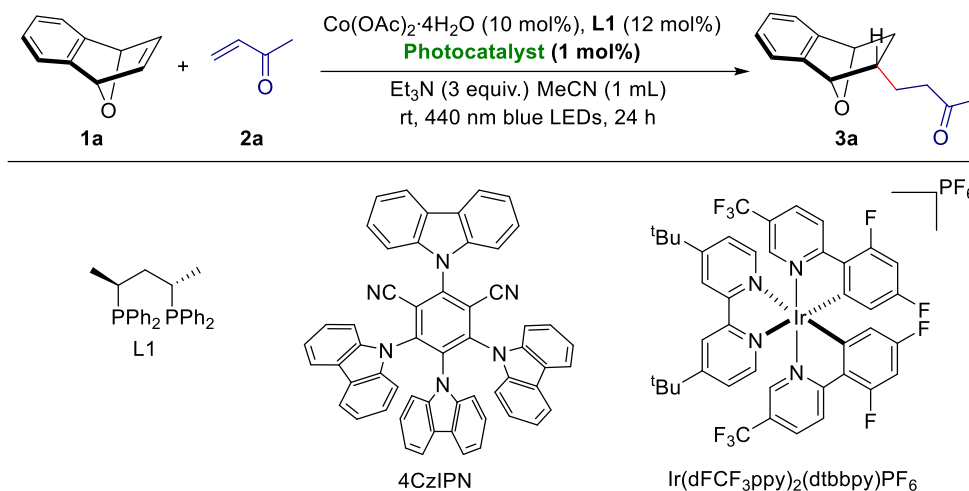

| Entry            | Photocatalyst                                                    | Wavelength    | Yield of <b>3a</b> (%) | Enantiomeric ratio | Diastereomeric ratio |
|------------------|------------------------------------------------------------------|---------------|------------------------|--------------------|----------------------|
| <b>1</b>         | $\text{Ir}(\text{dFCF}_3\text{ppy})_2(\text{dtbbpy})\text{PF}_6$ | <b>440 nm</b> | <b>94</b>              | <b>96:4</b>        | <b>&gt;99:1</b>      |
| 2                | 4CzIPN                                                           | 440 nm        | 90                     | 95:5               | >99:1                |
| 3 <sup>b,d</sup> | $\text{Ir}(\text{dFCF}_3\text{ppy})_2(\text{dtbbpy})\text{PF}_6$ | 440 nm        | 67                     | 96:4               | >99:1                |
| 4 <sup>c,d</sup> | $\text{Ir}(\text{dFCF}_3\text{ppy})_2(\text{dtbbpy})\text{PF}_6$ | 440 nm        | 54                     | 95.5:4.5           | >99:1                |
| 5 <sup>b,d</sup> | $\text{Ir}(\text{dFCF}_3\text{ppy})_2(\text{dtbbpy})\text{PF}_6$ | 427 nm        | 48                     | 95.5:4.5           | >99:1                |
| 6 <sup>b,d</sup> | $\text{Ir}(\text{dFCF}_3\text{ppy})_2(\text{dtbbpy})\text{PF}_6$ | 456 nm        | 48                     | 95.5:4.5           | >99:1                |

<sup>a</sup>Reaction Conditions: **1a** (0.1 mmol), **2a** (0.5 mmol),  $\text{Ir}(\text{dFCF}_3\text{ppy})_2(\text{dtbbpy})\text{PF}_6$  (1 mol%),  $\text{Co}(\text{OAc})_2 \cdot 4\text{H}_2\text{O}$  (10 mol%), **L1** (12 mol%),  $\text{NEt}_3$  (0.3 mmol), Kessil Blue LED (25 intensity) in MeCN (1 mL) at room temperature under Ar. Yields and diastereomeric ratios are determined by <sup>1</sup>HNMR analysis using 1,3,5-trimethoxy benzene as an internal standard. Enantiomeric ratios are checked by the chiral HPLC stationary phase column. <sup>b</sup>10 mol%  $\text{Et}_3\text{N} \cdot \text{HOTf}$ . <sup>c</sup>50 intensity. <sup>d</sup>**2a** (0.3 mmol)

**Table S6. The Effect of Solvent and Equivalency of **2a**<sup>a</sup>**

Reaction scheme showing the conversion of **1a** and **2a** to **3a** under the following conditions:  $\text{Co}(\text{OAc})_2 \cdot 4\text{H}_2\text{O}$  (10 mol%), **L1** (12 mol%),  $\text{Ir}(\text{dFCF}_3\text{ppy})_2(\text{dtbbpy})\text{PF}_6$  (1 mol%),  $\text{Et}_3\text{N}$  (3 equiv.), Solvent (1 mL), rt, 440 nm blue LEDs, 24 h.

| Entry          | Solvent                  | <b>2a</b> (x equiv) | Yield of <b>3a</b> (%) | Enantiomeric ratio | diastereomeric ratio |
|----------------|--------------------------|---------------------|------------------------|--------------------|----------------------|
| <b>1</b>       | <b>MeCN</b>              | <b>5</b>            | <b>94</b>              | <b>96:4</b>        | <b>&gt;99:1</b>      |
| 2 <sup>b</sup> | MeCN                     | 3                   | 61                     | 95.5:4.5           | >99:1                |
| 3 <sup>b</sup> | DMSO                     | 3                   | 50                     | 96:4               | >99:1                |
| 4 <sup>b</sup> | Toluene                  | 3                   | 7                      | --                 | --                   |
| 5 <sup>b</sup> | THF                      | 3                   | 20                     | --                 | --                   |
| 6 <sup>b</sup> | $\text{CH}_2\text{Cl}_2$ | 3                   | 18                     | --                 | --                   |
| 7 <sup>b</sup> | MeCN                     | 4                   | 72                     | 95.5:4.5           | >99:1                |

<sup>a</sup>Reaction Conditions: **1a** (0.1 mmol), **2a** (0.3-0.5 mmol),  $\text{Ir}(\text{dFCF}_3\text{ppy})_2(\text{dtbbpy})\text{PF}_6$  (1 mol%),  $\text{Co}(\text{OAc})_2 \cdot 4\text{H}_2\text{O}$  (10 mol%), **L1** (12 mol%),  $\text{NEt}_3$  (0.3 mmol), Blue LED (440 nm) in Solvent

at room temperature under Ar. Yields and diastereomeric ratios are determined by <sup>1</sup>HNMR analysis of crude mixture using 1,3,5-trimethoxybenzene as an internal standard. Enantiomeric ratios are checked by the chiral HPLC stationary phase column. <sup>b</sup>H<sub>2</sub>O (1 equiv.) is added as a proton source.

**Table S7. Control Experiment<sup>a</sup>**

| Entry | Deviation            | Yield of 3a (%) | Enantiomeric ratio | Diastereomeric ratio |
|-------|----------------------|-----------------|--------------------|----------------------|
| 1     | None                 | 94              | 96:4               | >99:1                |
| 2     | no photocatalyst     | trace           | ---                | ---                  |
| 3     | no Co Salt/Ligand    | trace           | ---                | ---                  |
| 4     | no Et <sub>3</sub> N | trace           | ---                | ---                  |
| 5     | no Light             | trace           | ---                | ---                  |

<sup>a</sup>Reaction Conditions: **1a** (0.05 mmol), **2a** (0.25 mmol), Ir(dFCF<sub>3</sub>ppy)<sub>2</sub>(dtbbpy)PF<sub>6</sub> (1 mol%), Co(OAc)<sub>2</sub>·4H<sub>2</sub>O (10 mol%), **L1** (12 mol%), NEt<sub>3</sub> (0.3 mmol), Blue LED (440 nm) in 0.5 mL MeCN at room temperature under Ar. Yields and diastereomeric ratios are determined by <sup>1</sup>HNMR analysis using 1,3,5-trimethoxy benzene as an internal standard. Enantiomeric ratios are checked by the chiral HPLC stationary phase column.

### 3. General Procedure for the Asymmetric Reductive Coupling of Oxabenzonorbornadiene (**1a**) and Methyl Vinyl Ketone (**2a**) via Visible Light Photoredox-Cobalt dual catalysis

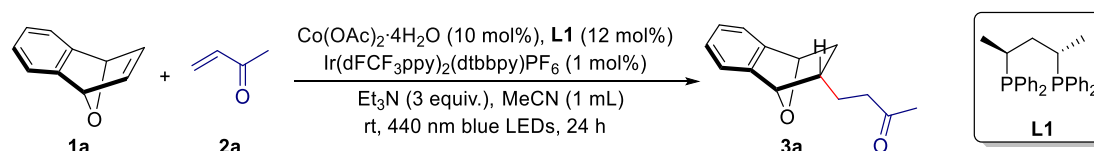

In an argon-filled glove box, a 15 mL reaction tube was charged with Co(OAc)<sub>2</sub>·4H<sub>2</sub>O (2 mg; 10 mol%) and (*S,S*)-**L1** (5.6 mg; 12 mol%) in 1 mL dry MeCN. The mixture was stirred for 10 minutes. Then Ir(dFCF<sub>3</sub>ppy)<sub>2</sub>(dtbbpy)PF<sub>6</sub> (1 mg; 1 mol%), triethyl amine (41 μL; 0.3 mmol), **1a** (14.4 mg, 0.1 mmol) and **2a** (43 μL; 0.5 mmol) were sequentially added into the tube. The tube was sealed and removed from the glove box. Then the reaction tube was stirred for 24 h under irradiation with 440 nm Kessil blue LEDs at room temperature. After 24 h, the mixture was filtered through the small pad of silica gel with additional ethyl acetate and concentrated in a vacuum. Yields and diastereomeric ratio were determined by crude <sup>1</sup>HNMR analysis using 1,3,5-trimethoxybenzene as an internal standard. The crude product was purified by flash column chromatography on silica gel with EtOAc/hexane as eluent to afford the desired reductive coupling product. The enantiomeric ratio was checked by the chiral HPLC stationary phase column.

## 4. Characterization Data:

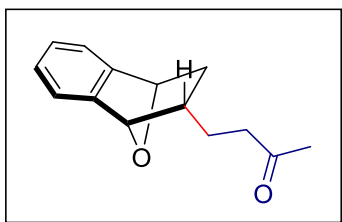

### 4-((1S,2S,4R)-1,2,3,4-tetrahydro-1,4-epoxynaphthalen-2-yl)butan-2-one (3a)

Colorless oil. Yield = 90%; 15.9 mg. er = 96:4, dr = >99:1

$R_f$  0.2 (15 % EtOAc in Hexane)

$^1\text{H NMR}$  (500 MHz,  $\text{CDCl}_3$ )  $\delta$  7.24 – 7.19 (m, 2H), 7.14 – 7.11 (m, 2H), 5.36 (d,  $J$  = 4.4 Hz, 1H), 5.03 (s, 1H), 2.53 (t,  $J$  = 7.4 Hz, 2H), 2.16 (s, 3H), 1.99 – 1.92 (m, 1H), 1.81 – 1.74 (m, 1H), 1.72 – 1.67 (m, 1H), 1.64 – 1.60 (m, 2H).

$^{13}\text{C NMR}$  (126 MHz,  $\text{CDCl}_3$ )  $\delta$  208.8 (s, C=O), 146.2 (s, Ar), 145.9 (s, Ar), 126.9 (d, ArH), 119.2 (d, ArH), 83.3 (d, CH), 79.7 (d, CH), 42.3 (t,  $\text{CH}_2$ ), 40.3 (q,  $\text{CH}_3$ ), 34.8 (d, CH), 30.3 (t,  $\text{CH}_2$ ), 29.2 (t,  $\text{CH}_2$ ).

$\text{IR}$  (ATR/ $\nu$   $\text{cm}^{-1}$ ): 2941, 2868, 1709, 1456.

$\text{HRMS}$  (ESI-TOF):  $m/z$   $[\text{M}+\text{Na}]^+$  Calculated for  $\text{C}_{14}\text{H}_{16}\text{O}_2\text{Na}^+$ : 239.1043, found 239.1037.

$[\alpha]_D^{25} = +35^\circ$  (c = 0.001 in  $\text{CHCl}_3$ )

$\text{HPLC}$ : Daicel CHIRALPAK OD-H; hexane:  $i$ PrOH = 85:15; detection wavelength = 264.0 nm; flow rate = 1.0 mL/min.  $t_R$  = 10.616 min (major) and 8.715 min (minor). Enantiomeric ratio = 96:4.

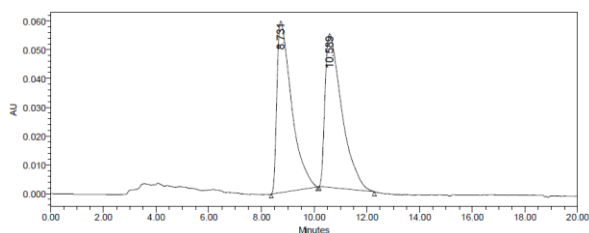

|   | RT     | Area    | % Area | Height |
|---|--------|---------|--------|--------|
| 1 | 8.731  | 2305311 | 49.51  | 59503  |
| 2 | 10.589 | 2350640 | 50.49  | 53248  |

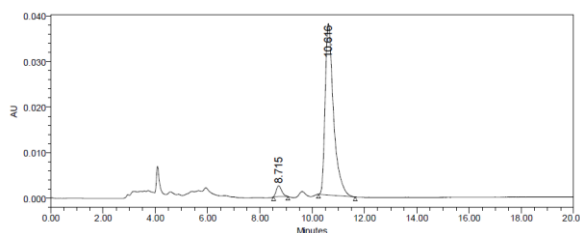

|   | RT     | Area   | % Area | Height |
|---|--------|--------|--------|--------|
| 1 | 8.715  | 33803  | 3.92   | 2364   |
| 2 | 10.616 | 829131 | 96.08  | 37533  |

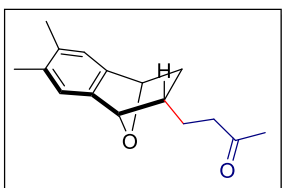

### 4-((1S,2S,4R)-6,7-dimethyl-1,2,3,4-tetrahydro-1,4-epoxynaphthalen-2-yl)butan-2-one (3b):

Colorless oil. Yield = 79%; 19.3 mg. er = 93.7:6.3, dr = >99:1

$R_f$  0.3 (10 % EtOAc in Hexane)

$^1\text{H NMR}$  (500 MHz,  $\text{CDCl}_3$ )  $\delta$  7.01 (s, 1H), 6.99 (s, 1H), 5.29 (d,  $J$  = 4.3 Hz, 1H), 4.96 (s, 1H), 2.51 (t,  $J$  = 7.6 Hz, 2H), 2.23 (s, 6H), 2.15 (s, 3H), 1.97-1.90 (m, 1H), 1.79-1.72 (m, 1H), 1.69 – 1.63 (m, 1H), 1.61-1.57 (m, 2H).

$^{13}\text{C NMR}$  (126 MHz,  $\text{CDCl}_3$ )  $\delta$  208.4, 143.6, 143.4, 134.3, 120.1, 120.1, 82.7, 79.1, 41.9, 40.2, 34.8, 29.8, 28.8, 19.8.

**IR (ATR/v  $\text{cm}^{-1}$ ):** 2928, 2863, 1714, 1454.

**HRMS (ESI-TOF):**  $m/z$   $[\text{M}+\text{Na}]^+$  calculated for  $\text{C}_{16}\text{H}_{20}\text{O}_2\text{Na}^+$ : 267.1356, found 267.1358.

$[\alpha]_D^{25} = +41^\circ$  ( $c = 0.001$  in  $\text{CHCl}_3$ ).

**HPLC Data:** Daicel CHIRALPAK OD-H; hexane:  $i$ PrOH = 90:10; detection wavelength = 279.4 nm; flow rate = 1.0 mL/min.  $t_R = 11.768$  min (major) and 10.486 min (minor), Enantiomeric ratio = 93.7:6.3.

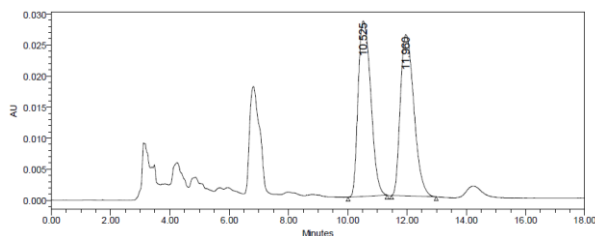

|   | RT     | Area   | % Area | Height |
|---|--------|--------|--------|--------|
| 1 | 10.525 | 831778 | 50.16  | 28230  |
| 2 | 11.960 | 826511 | 49.84  | 25947  |

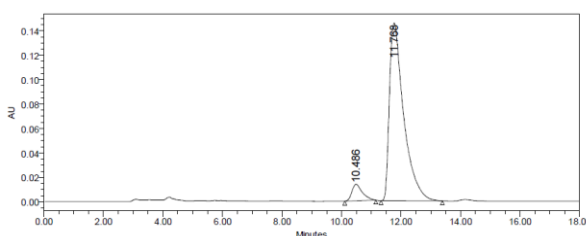

|   | RT     | Area    | % Area | Height |
|---|--------|---------|--------|--------|
| 1 | 10.486 | 327502  | 6.35   | 13526  |
| 2 | 11.768 | 4829779 | 93.65  | 145345 |

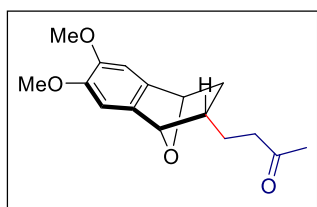

#### 4-((1S,2S,4R)-6,7-dimethoxy-1,2,3,4-tetrahydro-1,4-epoxynaphthalen-2-yl)butan-2-one (3c):

White solid. Yield = 80%; 22.1 mg. er = 96:4, dr = >99:1

$R_f$  0.2 (25 % EtOAc in Hexane)

$^1\text{H NMR}$  (500 MHz,  $\text{CDCl}_3$ )  $\delta$  6.85 (s, 1H), 6.82 (s, 1H), 5.30 (d,  $J = 4.5$  Hz, 1H), 4.97 (s, 1H), 3.86 (s, 3H), 3.85 (s, 3H), 2.51 (t,  $J = 7.4$  Hz, 2H), 2.15 (s, 3H), 1.97 – 1.90 (m, 1H), 1.78–1.71 (m, 1H), 1.67 – 1.61 (m, 1H), 1.57 – 1.54 (m, 2H).

$^{13}\text{C NMR}$  (126 MHz,  $\text{CDCl}_3$ )  $\delta$  208.8, 148.2, 138.5, 138.3, 104.4, 104.3, 83.6, 80.0, 56.7, 42.4, 40.7, 35.3, 30.3, 29.3.

**IR (ATR/v  $\text{cm}^{-1}$ ):** 2925, 2855, 1711, 1464, 1264.

**HRMS (ESI-TOF):**  $m/z$   $[\text{M}+\text{Na}]^+$  calculated for  $\text{C}_{16}\text{H}_{20}\text{O}_4\text{Na}^+$ : 299.1254, found 299.1254.

$[\alpha]_D^{25} = +25^\circ$  ( $c = 0.001$  in  $\text{CHCl}_3$ )

**HPLC Data:** Daicel CHIRALPAK OD-H; hexane:  $i$ PrOH = 70:30; detection wavelength = 264.0 nm; flow rate = 1.0 mL/min.  $t_R = 17.108$  min (major) and 33.923 min (minor). Enantiomeric ratio = 96:4.

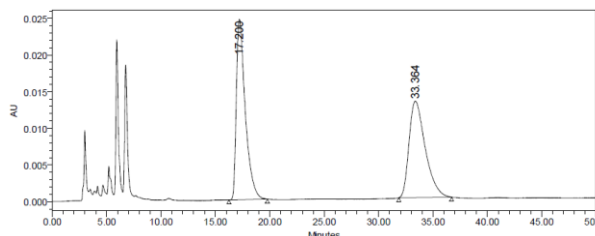

|   | RT     | Area    | % Area | Height |
|---|--------|---------|--------|--------|
| 1 | 17.200 | 1421146 | 51.15  | 24618  |
| 2 | 33.364 | 1357246 | 48.85  | 13150  |

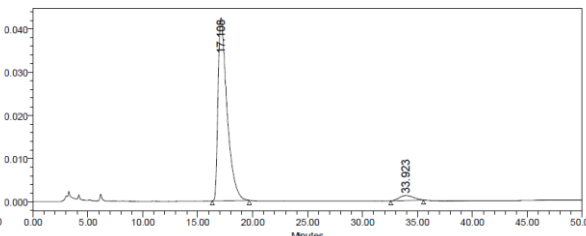

|   | RT     | Area    | % Area | Height |
|---|--------|---------|--------|--------|
| 1 | 17.108 | 2456305 | 96.05  | 42429  |
| 2 | 33.923 | 101013  | 3.95   | 1157   |



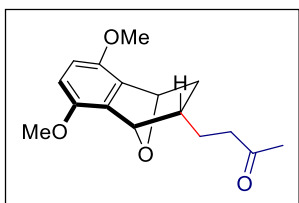

**4-((1S,2S,4R)-5,8-dimethoxy-1,2,3,4-tetrahydro-1,4-epoxynaphthalen-2-yl)butan-2-one (3d):**

White solid. Yield = 92%; 25.4 mg. er = 97.6:2.4, dr = >99:1

$R_f$  0.2 (20 % EtOAc in Hexane)

$^1\text{H NMR}$  (500 MHz,  $\text{CDCl}_3$ )  $\delta$  6.62 (s, 2H), 5.52 (d,  $J = 4.9$  Hz, 1H), 5.19 (s, 1H), 3.78 (s, 3H), 3.77 (s, 3H) 2.53 (t,  $J = 7.6$  Hz, 2H), 2.16 (s, 3H), 1.96 – 1.89 (m, 1H), 1.81 – 1.74 (m, 1H), 1.72 – 1.67 (m, 1H), 1.66 – 1.62 (m, 1H), 1.58 – 1.54 (m, 1H).

$^{13}\text{C NMR}$  (126 MHz,  $\text{CDCl}_3$ )  $\delta$  208.9, 147.0, 146.9, 135.4, 135.1, 111.6, 81.1, 56.5, 42.3, 39.9, 34.4, 30.4, 29.2.

$\text{IR}$  (ATR/ $\nu$   $\text{cm}^{-1}$ ): 2933, 2845, 1709, 1498.

$\text{HRMS}$  (ESI-TOF):  $m/z$   $[\text{M}+\text{Na}]^+$  calculated for  $\text{C}_{16}\text{H}_{20}\text{O}_4\text{Na}^+$ : 299.1254, found 299.1253.

$[\alpha]_D^{25} = +37^\circ$  ( $c = 0.001$  in  $\text{CHCl}_3$ )

**HPLC Data:** Daicel CHIRALPAK OD-H; hexane:  $i$ PrOH = 85:15; detection wavelength = 286.6 nm; flow rate = 1.0 mL/min.  $t_R = 10.782$  min (major) and 12.017 min (minor), Enantiomeric ratio = 97.6:2.4.

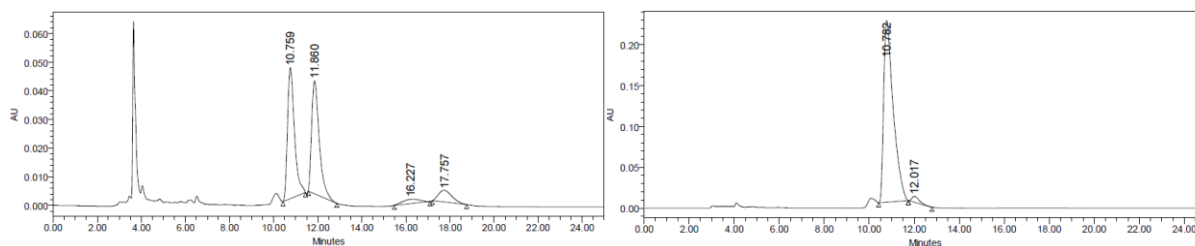

|   | RT     | Area   | % Area | Height |
|---|--------|--------|--------|--------|
| 1 | 10.759 | 990732 | 45.27  | 45666  |
| 2 | 11.860 | 942358 | 43.06  | 39391  |
| 3 | 16.227 | 78768  | 3.60   | 1484   |
| 4 | 17.757 | 176832 | 8.08   | 4087   |

|   | RT     | Area    | % Area | Height |
|---|--------|---------|--------|--------|
| 1 | 10.782 | 6587423 | 97.57  | 221780 |
| 2 | 12.017 | 163727  | 2.43   | 7267   |

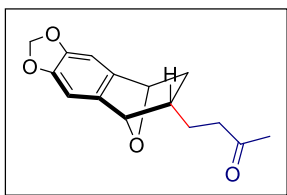

**4-((5S,6S,8R)-5,6,7,8-tetrahydro-5,8-epoxynaphtho[2,3-d][1,3]dioxol-6-yl)butan-2-one (3e):**

White solid. Yield = 77%; 20.0 mg. er = 95:5, dr = >99:1

$R_f$  0.2 (20 % EtOAc in Hexane)

$^1\text{H NMR}$  (500 MHz,  $\text{CDCl}_3$ )  $\delta$  6.72 (d,  $J = 9.8$  Hz, 2H), 5.93 (s, 1H), 5.90 (s, 1H), 5.26 (d,  $J = 4.1$  Hz, 1H), 4.93 (s, 1H), 2.50 (t,  $J = 7.5$  Hz, 2H), 2.15 (s, 3H), 1.95-1.88 (m, 1H), 1.78-1.70 (m, 1H), 1.66-1.60 (m, 1H), 1.56 – 1.54 (m, 2H).

$^{13}\text{C NMR}$  (126 MHz,  $\text{CDCl}_3$ )  $\delta$  208.5, 146.3, 139.6, 139.4, 101.4, 101.4, 101.2, 83.1, 42.1, 40.3, 34.8, 30.0, 28.9.

$\text{IR}$  (ATR/ $\nu$   $\text{cm}^{-1}$ ): 2936, 2868, 1708, 1620, 1467.

**HRMS (ESI-TOF):**  $m/z$   $[M+Na]^+$  calculated for  $C_{15}H_{16}O_4Na^+$ : 283.0941, found 283.0954.

$[\alpha]_D^{25} = +35^\circ$  ( $c = 0.001$  in  $CHCl_3$ ).

**HPLC Data:** Daicel CHIRALPAK OD-H; hexane: *i*PrOH = 80:20; detection wavelength = 294.9 nm; flow rate = 1.0 mL/min.  $t_R = 14.239$  min (major) and 10.975 min (minor), Enantiomeric ratio = 95:5.

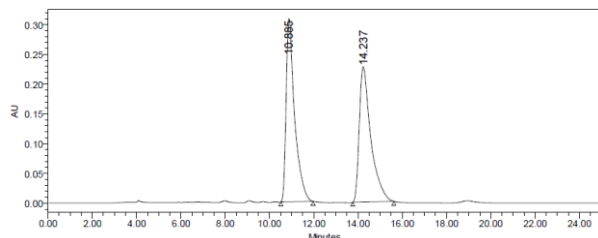

|   | RT     | Area    | % Area | Height |
|---|--------|---------|--------|--------|
| 1 | 10.885 | 8190681 | 49.85  | 307429 |
| 2 | 14.237 | 8240955 | 50.15  | 227004 |

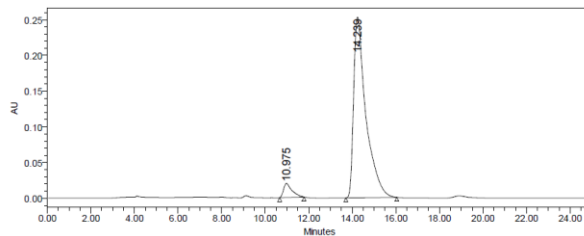

|   | RT     | Area    | % Area | Height |
|---|--------|---------|--------|--------|
| 1 | 10.975 | 523533  | 5.04   | 19610  |
| 2 | 14.239 | 9865208 | 94.96  | 252805 |

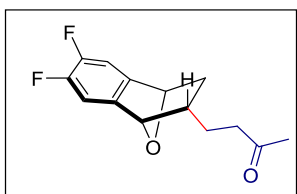

**4-((1S,2S,4R)-6,7-difluoro-1,2,3,4-tetrahydro-1,4-epoxynaphthalen-2-yl)butan-2-one (3f):**

Yellow oil. Yield = 69%; 17.40 mg. er = 94.4:5.6, dr = >99:1

$R_f$  0.3 (12 % EtOAc in Hexane)

**$^1H$  NMR (500 MHz,  $CDCl_3$ )**  $\delta$  7.06 – 7.00 (m, 2H), 5.31 (t,  $J = 2.7$  Hz, 1H), 4.99 (s, 1H), 2.51 (t,  $J = 7.4$  Hz, 2H), 2.15 (s, 3H), 1.97-1.89 (m, 1H), 1.79-1.72 (m, 1H), 1.70 – 1.64 (m, 1H), 1.59 – 1.57 (m, 2H).

**$^{13}C$  NMR (126 MHz,  $CDCl_3$ )**  $\delta$  208.1, 149.0 (dd,  $^1J_{C-F} = 248.2$  Hz,  $^2J_{C-F} = 15.1$  Hz), 148.9 (dd,  $^1J_{C-F} = 248.2$  Hz,  $^2J_{C-F} = 15.1$  Hz), 141.5 (dd,  $^2J_{C-F} = 32.2$ ,  $^3J_{C-F} = 3.7$  Hz), 141.4 (dd,  $^2J_{C-F} = 32.2$ ,  $^3J_{C-F} = 3.7$  Hz), 108.8 (overlap), 108.7 (overlap), 82.5, 79.0, 41.6, 39.7, 34.2, 29.9, 28.4.

**$^{19}F$  NMR (471 MHz,  $CDCl_3$ )**  $\delta$  -140.04 – -140.21 (m).

**IR (ATR/ $\nu$   $cm^{-1}$ ):** 2933, 2871, 1714, 1615, 1477.

**HRMS (ESI-TOF):**  $m/z$   $[M+Na]^+$  calculated for  $C_{14}H_{14}F_2O_2 Na^+$ : 275.0854, found 275.0852.

$[\alpha]_D^{25} = +34^\circ$  ( $c = 0.001$  in  $CHCl_3$ ).

**HPLC Data:** Daicel CHIRALPAK OD-H; hexane: *i*PrOH = 90:10; detection wavelength = 272.3 nm; flow rate = 1.0 mL/min.  $t_R = 14.522$  min (major) and 10.720 min (minor), Enantiomeric ratio = 94.4:5.6.

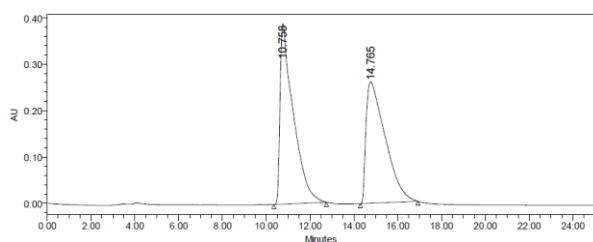

|   | RT     | Area     | % Area | Height |
|---|--------|----------|--------|--------|
| 1 | 10.758 | 16317990 | 50.63  | 389423 |
| 2 | 14.765 | 15910908 | 49.37  | 261689 |

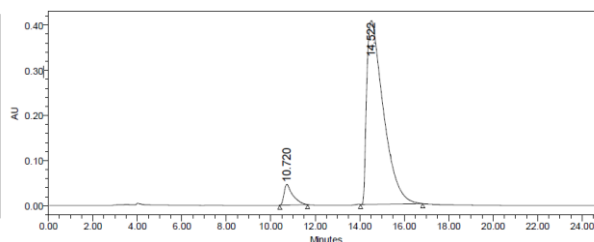

|   | RT     | Area     | % Area | Height |
|---|--------|----------|--------|--------|
| 1 | 10.720 | 1249566  | 5.56   | 45967  |
| 2 | 14.522 | 21206383 | 94.44  | 407376 |

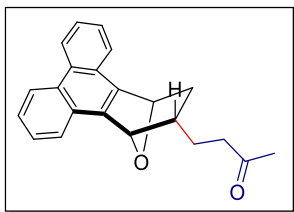

**4-((1S,2S,4R)-1,2,3,4-tetrahydro-1,4-epoxytriphenylen-2-yl)butan-2-one (3g):**

White solid. Yield = 86%; 27.2 mg. er = 94:6, dr = >99:1

$R_f$  0.3 (15 % EtOAc in Hexane)

$^1\text{H NMR}$  (500 MHz,  $\text{CDCl}_3$ )  $\delta$  8.74 – 8.72 (m, 2H), 7.91 – 7.88 (m, 2H), 7.67 – 7.62 (m, 4H), 5.97 (d,  $J = 4.6$  Hz, 1H), 5.66 (s, 1H), 2.60 (t,  $J = 7.6$  Hz, 2H), 2.18 (s, 3H), 2.13 – 2.05 (m, 1H), 1.97 – 1.90 (m, 1H), 1.78 – 1.74 (m, 1H), 1.71 – 1.65 (m, 2H).

$^{13}\text{C NMR}$  (126 MHz,  $\text{CDCl}_3$ )  $\delta$  208.3, 140.6, 140.2, 130.0, 126.8, 126.7, 126.0, 125.7, 125.6, 124.0, 123.9, 123.5, 123.5, 82.2, 78.7, 42.1, 40.2, 34.6, 29.8, 28.8.

$\text{IR}$  (ATR/ $\nu$   $\text{cm}^{-1}$ ): 2930, 2863, 1711, 1516.

$\text{HRMS}$  (ESI-TOF):  $m/z$   $[\text{M}+\text{Na}]^+$  calculated for  $\text{C}_{22}\text{H}_{20}\text{O}_2\text{Na}^+$ : 339.1356, found 339.1365.

$[\alpha]_D^{25} = +29^\circ$  ( $c = 0.001$  in  $\text{CHCl}_3$ )

**HPLC Data:** Daicel CHIRALPAK AD-H; hexane:  $i$ PrOH = 50:50; detection wavelength = 358.1 nm; flow rate = 1.0 mL/min.  $t_R = 11.267$  min (major) and 17.651 min (minor), Enantiomeric ratio = 94:6

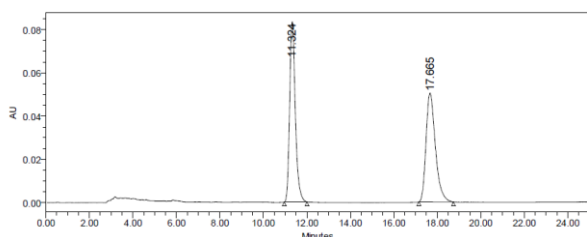

| RT       | Area    | % Area | Height |
|----------|---------|--------|--------|
| 1 11.324 | 1506292 | 50.17  | 83330  |
| 2 17.665 | 1496379 | 49.83  | 50339  |

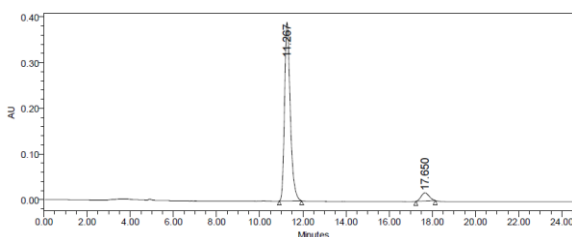

| RT       | Area    | % Area | Height |
|----------|---------|--------|--------|
| 1 11.267 | 7207861 | 94.01  | 391044 |
| 2 17.650 | 459368  | 5.99   | 17812  |

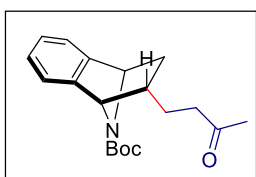

**tert-butyl(1S,2S,4R)-2-(3-oxobutyl)-1,2,3,4-tetrahydro-1,4-epiminonaphthalene-9-carboxylate (3h):**

White solid. Yield = 72%; 22.7 mg. er = 95.4:4.6, dr = >99:1

$R_f$  0.3 (10 % EtOAc in Hexane).

$^1\text{H NMR}$  (500 MHz,  $\text{CDCl}_3$ )  $\delta$  7.22 – 7.20 (m, 2H), 7.11 – 7.06 (m, 2H), 5.08 (bs, 1H), 4.82 (s, 1H), 2.52 (t,  $J = 7.5$  Hz, 2H), 2.15 (s, 3H), 1.93 – 1.87 (m, 1H), 1.77 – 1.74 (m, 1H), 1.65 – 1.59 (m, 3H), 1.36 (s, 9H).

$^{13}\text{C NMR}$  (126 MHz,  $\text{CDCl}_3$ )  $\delta$  208.3 (s, C=O), 145.3 (s, C=O), 126.3 (d, ArH), 119.7 (s, Ar), 80.0 (d, CH), 61.3 (s, C), 42.0 (t,  $\text{CH}_2$ ), 29.9 (q,  $\text{CH}_3 + \text{t}$ ,  $\text{CH}_2$ , overlapped), 28.8 (t,  $\text{CH}_2$ ), 28.2 (q,  $\text{CH}_3$ ). One (d, CH) is not visible.

$\text{IR}$  (ATR/ $\nu$   $\text{cm}^{-1}$ ): 2941, 2869, 1686, 1714.

$\text{HRMS}$  (ESI-TOF):  $m/z$   $[\text{M}+\text{Na}]^+$  calculated for  $\text{C}_{19}\text{H}_{25}\text{NO}_3\text{Na}^+$ : 338.1727, found 338.1722.

$[\alpha]_D^{25} = +37^\circ$  ( $c = 0.001$  in  $\text{CHCl}_3$ )

**HPLC Data:** Daicel CHIRALPAK OD-H; hexane: *i*PrOH = 90:10; detection wavelength = 264.0 nm; flow rate = 1.0 mL/min.  $t_R$  = 6.456 min (major) and 5.706 min (minor), Enantiomeric ratio = 95.4:4.6.

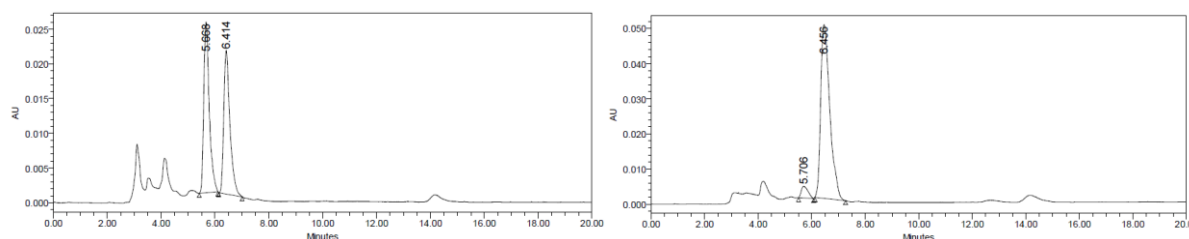

|   | RT    | Area   | % Area | Height |
|---|-------|--------|--------|--------|
| 1 | 5.668 | 352756 | 51.89  | 24583  |
| 2 | 6.414 | 327089 | 48.11  | 20677  |

|   | RT    | Area    | % Area | Height |
|---|-------|---------|--------|--------|
| 1 | 5.706 | 56505   | 4.63   | 3258   |
| 2 | 6.456 | 1163071 | 95.37  | 49342  |

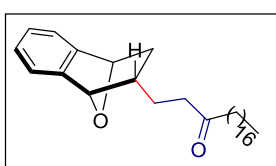

**1-((1S,2S,4R)-1,2,3,4-tetrahydro-1,4-epoxynaphthalen-2-yl)icosan-3-one-methane (1/1)  
(3i):**

White solid. Yield = 95%; 42 mg. er = 94.1:5.9, dr = >99:1

$R_f$  0.3 (5 % EtOAc in Hexane);

$^1\text{H NMR}$  (500 MHz,  $\text{CDCl}_3$ )  $\delta$  7.23 – 7.19 (m, 2H), 7.15 – 7.11 (m, 2H), 5.35 (d,  $J$  = 4.3 Hz, 1H), 5.02 (s, 1H), 2.49 (t,  $J$  = 7.5 Hz, 2H), 2.40 (t,  $J$  = 7.4 Hz, 2H), 1.99 – 1.92 (m, 1H), 1.80 – 1.73 (m, 1H), 1.71 – 1.66 (m, 1H), 1.61 – 1.55 (m, 3H), 1.25 (bs, 29H), 0.88 (t,  $J$  = 6.8 Hz, 3H).

$^{13}\text{C NMR}$  (126 MHz,  $\text{CDCl}_3$ )  $\delta$  211.2, 146.2, 146.0, 126.9, 119.2, 83.3, 79.8, 43.3, 41.4, 40.4, 34.9, 32.3, 30.1, 30.0, 29.9, 29.8, 29.8, 29.7, 29.3, 24.3, 23.1, 14.5.

IR (ATR/ $\nu$   $\text{cm}^{-1}$ ): 2917, 2855, 1703, 1456.

HRMS (ESI-TOF):  $m/z$   $[\text{M}+\text{Na}]^+$  calculated for  $\text{C}_{30}\text{H}_{48}\text{O}_2\text{Na}^+$ : 463.3547, found 463.3553.

$[\alpha]_D^{25} = +29^\circ$  ( $c$  = 0.001 in  $\text{CHCl}_3$ )

**HPLC Data:** Daicel CHIRALPAK OD-H; hexane: *i*PrOH = 98:2; detection wavelength = 264.0 nm; flow rate = 1.0 mL/min.  $t_R$  = 10.649 min (major) and 9.648 min (minor), Enantiomeric ratio = 94.1:5.9.

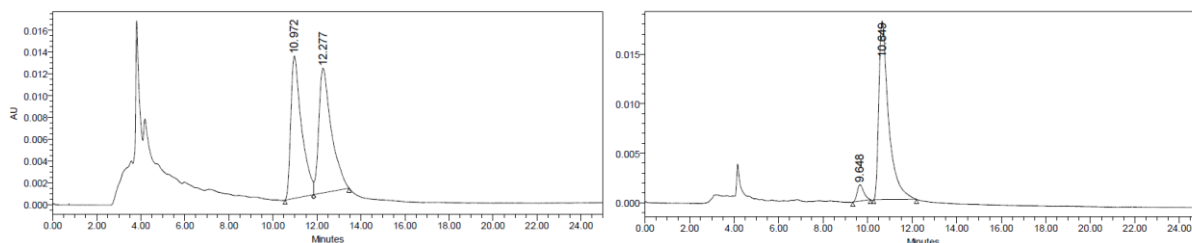

|   | RT     | Area   | % Area | Height |
|---|--------|--------|--------|--------|
| 1 | 10.972 | 441458 | 49.36  | 13037  |
| 2 | 12.277 | 452925 | 50.64  | 11434  |

|   | RT     | Area   | % Area | Height |
|---|--------|--------|--------|--------|
| 1 | 9.648  | 34092  | 5.86   | 1669   |
| 2 | 10.649 | 548152 | 94.14  | 18012  |

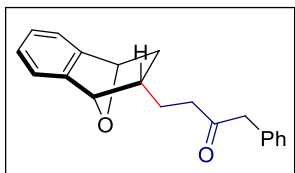

### 1-phenyl-4-((1S,2S,4R)-1,2,3,4-tetrahydro-1,4-epoxynaphthalen-2-yl)butan-2-one (3j):<sup>1</sup>

Colorless oil. Yield = 56%; 16.4 mg. er = 95.8:4.2, dr = >99:1

$R_f$  0.3 (10 % EtOAc in Hexane).

<sup>1</sup>H NMR (500 MHz, CDCl<sub>3</sub>) δ 7.34 – 7.32 (m, 2H), 7.28 – 7.27 (m, 1H), 7.21 – 7.16 (m, 4H), 7.13 – 7.11 (m, 2H), 5.32 (d, J = 4.0 Hz, 1H), 4.95 (s, 1H), 3.70 (s, 2H), 2.55 (t, J = 6.8 Hz, 2H), 1.96 – 1.89 (m, 1H), 1.79 – 1.72 (m, 1H), 1.66 – 1.61 (m, 1H), 1.54 – 1.52 (m, 2H). <sup>13</sup>C NMR (126 MHz, CDCl<sub>3</sub>) δ 208.2, 146.2, 145.9, 134.6, 129.8, 129.2, 127.5, 126.9, 119.2, 83.2, 79.7, 50.6, 40.4, 40.2, 34.8, 29.1.

IR (ATR/v cm<sup>-1</sup>): 2925, 2855, 1714, 1498, 1456.

HRMS (ESI-TOF): m/z [M+Na]<sup>+</sup> calculated for C<sub>20</sub>H<sub>20</sub>O<sub>2</sub> Na<sup>+</sup>: 315.1356, found 315.1361.

[α]<sub>D</sub><sup>25</sup> = +25° (c = 0.001 in CHCl<sub>3</sub>).

HPLC Data: Daicel CHIRALPAK OD-H; hexane: iPrOH = 85:15; detection wavelength = 264.0 nm; flow rate = 1.0 mL/min. *t*<sub>R</sub> = 16.134 min (major) and 14.932 min (minor), Enantiomeric ratio = 95.8:4.2.

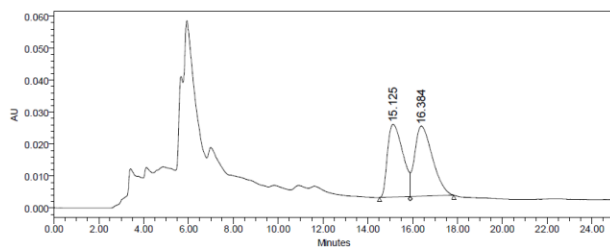

|   | RT     | Area    | % Area | Height |
|---|--------|---------|--------|--------|
| 1 | 15.125 | 1081351 | 47.17  | 22816  |
| 2 | 16.384 | 1211156 | 52.83  | 21968  |

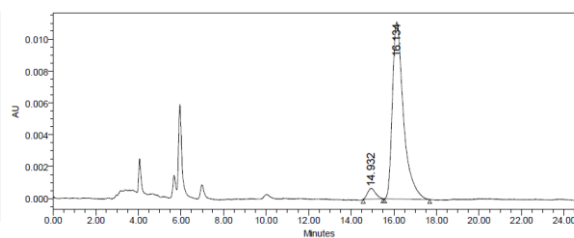

|   | RT     | Area   | % Area | Height |
|---|--------|--------|--------|--------|
| 1 | 14.932 | 17374  | 4.19   | 682    |
| 2 | 16.134 | 397547 | 95.81  | 11096  |

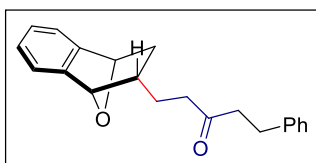

### 1-phenyl-5-((1S,2S,4R)-1,2,3,4-tetrahydro-1,4-epoxynaphthalen-2-yl) pentan-3-one (3k):<sup>1</sup>

Colourless oil. Yield = 61%; 18.7 mg. er = 94:6, dr = >99:1

$R_f$  0.3 (10 % EtOAc in Hexane);

<sup>1</sup>H NMR (500 MHz, CDCl<sub>3</sub>) δ 7.28 (s, 1H), 7.25 (s, 1H), 7.22 – 7.16 (m, 5H), 7.15 – 7.11 (m, 2H), 5.34 (d, J = 4.4 Hz, 1H), 4.99 (s, 1H), 2.90 (t, J = 7.6 Hz, 2H), 2.75 (t, J = 7.1 Hz, 2H), 2.47 (t, J = 7.4 Hz, 2H), 1.96 – 1.91 (m, 1H), 1.79 – 1.72 (m, 1H), 1.68 – 1.62 (m, 1H), 1.59 – 1.55 (m, 2H).

<sup>13</sup>C NMR (126 MHz, CDCl<sub>3</sub>) δ 210.0, 146.2, 145.9, 141.4, 128.9, 128.7, 126.9, 126.5, 119.3, 83.3, 79.7, 44.7, 41.7, 40.3, 34.8, 30.2, 29.2.

IR (ATR/v cm<sup>-1</sup>): 2938, 2920, 1698, 1498, 1384.

**HRMS (ESI-TOF):**  $m/z$   $[M+Na]^+$  calculated for  $C_{21}H_{22}O_2Na^+$ : 329.1512, found 329.1512.

$[\alpha]_D^{25} = +18^\circ$  ( $c = 0.001$  in  $CHCl_3$ )

**HPLC Data:** Daicel CHIRALPAK OD-H; hexane: *i*PrOH = 85:15; detection wavelength = 264.0 nm; flow rate = 1.0 mL/min.  $t_R = 24.695$  min (major) and 16.801 min (minor), Enantiomeric ratio = 94:6.

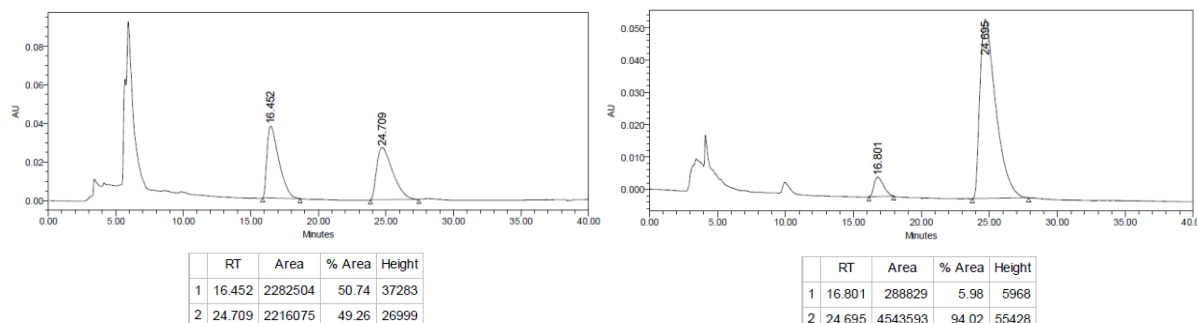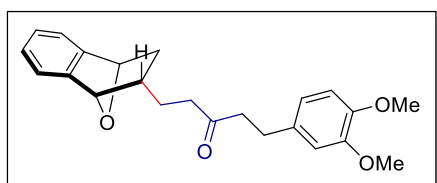

**1-(3,4-dimethoxyphenyl)-5-((1S,2S,4R)-1,2,3,4-tetrahydro-1,4-epoxynaphthalen-2-yl)pentan-3-one (3l):**

Colorless oil. Yield = 75%; 27.5 mg. er = 94.1:5.9, dr = >99:1

$R_f$  0.3 (20 % EtOAc in Hexane)

$^1H$  NMR (500 MHz,  $CDCl_3$ )  $\delta$  7.22 – 7.19 (m, 2H), 7.15 – 7.12 (m, 2H), 6.78-6.76 (m, 1H), 6.71 – 6.70 (m, 2H), 5.34 (d,  $J = 4.1$  Hz, 1H), 5.00 (s, 1H), 3.85 (s, 3H), 3.84 (s, 3H), 2.86 – 6.70 (m, 2H), 2.74 – 2.71 (m, 2H), 2.47 (t,  $J = 7.5$  Hz, 2H), 1.98 – 1.91 (m, 1H), 1.79 – 1.72 (m, 1H), 1.68 – 1.63 (m, 2H), 1.59 – 1.56 (m, 1H).

$^{13}C$  NMR (126 MHz,  $CDCl_3$ )  $\delta$  209.9, 149.1, 147.6, 145.9, 145.7, 133.8, 126.7, 120.2, 119.0, 111.9, 111.5, 83.0, 79.5, 56.0, 55.9, 44.7, 41.4, 40.0, 34.5, 29.6, 28.9.

IR (ATR/ $\nu$   $cm^{-1}$ ): 2928, 2855, 1711, 1589, 1511.

**HRMS (ESI-TOF):**  $m/z$   $[M+Na]^+$  calculated for  $C_{23}H_{26}O_4Na^+$ : 389.1723, found 389.1720.

$[\alpha]_D^{25} = +21^\circ$  ( $c = 0.001$  in  $CHCl_3$ )

**HPLC Data:** Daicel CHIRALPAK OD-H; hexane: *i*PrOH = 70:30; detection wavelength = 280.6 nm; flow rate = 1.0 mL/min.  $t_R = 30.35$  min (major) and 24.10 min (minor), Enantiomeric ratio = 94.1:5.9.

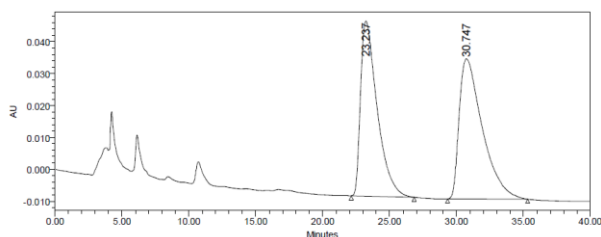

|   | RT     | Area    | % Area | Height |
|---|--------|---------|--------|--------|
| 1 | 23.237 | 4725622 | 47.25  | 54851  |
| 2 | 30.747 | 5274735 | 52.75  | 43914  |

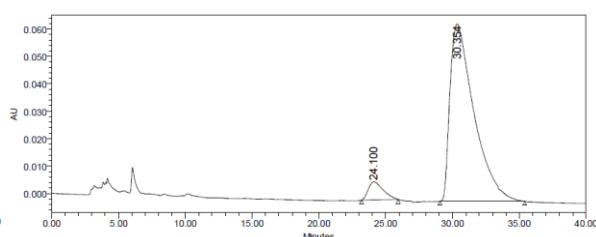

|   | RT     | Area    | % Area | Height |
|---|--------|---------|--------|--------|
| 1 | 24.100 | 507868  | 5.92   | 6561   |
| 2 | 30.354 | 8074474 | 94.08  | 64760  |

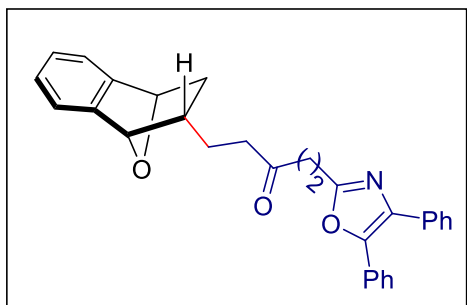

### 1-(4,5-diphenyloxazol-2-yl)-5-((1*S*,2*S*,4*R*)-1,2,3,4-tetrahydro-1,4-epoxynaphthalen-2-yl)pentan-3-one (3m):

Colorless oil. Yield = 54%; 24.2 mg. er = 94:6, dr = >99:1

$R_f$  0.2 (20% EtOAc in Hexane);

$^1\text{H NMR}$  (500 MHz,  $\text{CDCl}_3$ )  $\delta$  7.60 (d,  $J = 7.3$  Hz, 2H), 7.55 (d,  $J = 7.6$  Hz, 2H), 7.36 – 7.31 (m, 6H), 7.20 (d,  $J = 4.6$  Hz, 2H), 7.13 – 7.10 (m, 2H), 5.35 (d,  $J = 3.7$  Hz, 1H), 5.03 (s, 1H), 3.14 (t,  $J = 6.9$  Hz, 2H), 3.04 (t,  $J = 7.5$  Hz, 2H), 2.62 (t,  $J = 7.5$  Hz, 2H), 2.06 – 1.99 (m, 1H), 1.87 – 1.80 (m, 1H), 1.74 – 1.69 (m, 1H), 1.60 (d,  $J = 9.2$  Hz, 2H).

$^{13}\text{C NMR}$  (126 MHz,  $\text{CDCl}_3$ )  $\delta$  208.4, 162.4, 145.9, 145.7, 145.5, 135.2, 132.6, 129.1, 128.8, 128.7, 128.6, 128.2, 128.0, 126.6, 126.6, 126.6, 119.0, 118.9, 83.0, 79.5, 41.3, 40.0, 39.1, 34.5, 29.0, 22.3.

IR (ATR/ $\nu$   $\text{cm}^{-1}$ ): 2912, 2855, 1714, 1579, 1446.

HRMS (ESI-TOF):  $m/z$   $[\text{M}+\text{H}]^+$  calculated for  $\text{C}_{30}\text{H}_{28}\text{NO}_3^+$ : 450.2064, found 450.2061.

$[\alpha]_D^{25} = +27^\circ$  ( $c = 0.001$  in  $\text{CHCl}_3$ ).

HPLC Data: Daicel CHIRALPAK OD-H; hexane:  $i$ PrOH = 60:40; detection wavelength = 288.9 nm; flow rate = 1.0 mL/min.  $t_R = 15.690$  min (major) and 13.374 min (minor), enantiomeric ratio = 94:6.

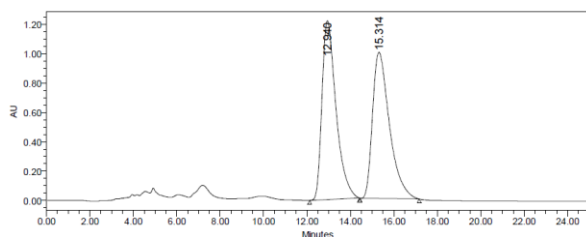

|   | RT     | Area     | % Area | Height  |
|---|--------|----------|--------|---------|
| 1 | 12.940 | 54757462 | 50.40  | 1219149 |
| 2 | 15.314 | 53894453 | 49.60  | 996864  |

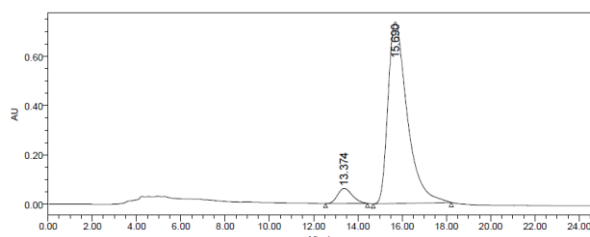

|   | RT     | Area     | % Area | Height |
|---|--------|----------|--------|--------|
| 1 | 13.374 | 2819579  | 5.98   | 61342  |
| 2 | 15.690 | 44306469 | 94.02  | 735184 |

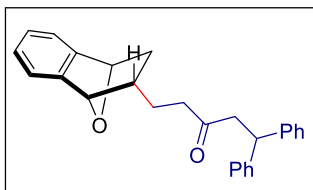

**1,1-diphenyl-4-((1*S*,2*S*,4*R*)-1,2,3,4-tetrahydro-1,4-epoxynaphthalen-2-yl)butan-2-one (3n):**

Colorless oil. Yield = 92%; 35.0 mg. er = 94:6, dr = >99:1

**R<sub>f</sub>** 0.3 (10% EtOAc in Hexane);

**<sup>1</sup>H NMR (500 MHz, CDCl<sub>3</sub>)** δ 7.29 – 7.26 (m, 2H), 7.25 – 7.21 (m, 5H), 7.20 – 7.16 (m, 4H), 7.15 – 7.11 (m, 3H), 5.31 (d, *J* = 4.3 Hz, 1H), 4.92 (s, 1H), 4.60 (t, *J* = 7.6 Hz, 1H), 3.17 (d, *J* = 7.3 Hz, 2H), 2.40 (t, *J* = 7.4 Hz, 2H), 1.89 – 1.82 (m, 1H), 1.69– 1.64 (m, 1H), 1.56 – 1.52 (m, 1H), 1.49 (d, *J* = 7.8 Hz, 2H).

**<sup>13</sup>C NMR (126 MHz, CDCl<sub>3</sub>)** δ 208.8, 145.9, 145.6, 144.0, 128.7, 127.8, 126.6, 119.0, 118.9, 83.0, 79.4, 49.0, 46.2, 42.0, 39.8, 34.4, 28.6.

**IR (ATR/v cm<sup>-1</sup>):** 2933, 2855, 1711, 1493, 1451.

**HRMS (ESI-TOF):** *m/z* [M+Na]<sup>+</sup> calculated for C<sub>27</sub>H<sub>26</sub>O<sub>2</sub> Na<sup>+</sup>: 405.1825, found 405.1823.

**[α]<sub>D</sub><sup>25</sup>** = +20° (*c* = 0.001 in CHCl<sub>3</sub>).

**HPLC Data:** Daicel CHIRALPAK OD-H; hexane: *i*PrOH = 50:50; detection wavelength = 264.0 nm; flow rate = 1.0 mL/min. *t<sub>R</sub>* = 28.703 min (major) and 12.522 min (minor), enantiomeric ratio = 94:6.

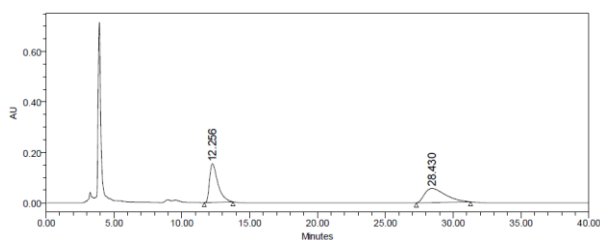

|   | RT     | Area    | % Area | Height |
|---|--------|---------|--------|--------|
| 1 | 12.256 | 6535309 | 52.33  | 152849 |
| 2 | 28.430 | 5954039 | 47.67  | 55820  |

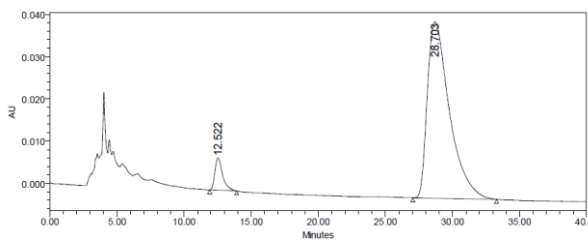

|   | RT     | Area    | % Area | Height |
|---|--------|---------|--------|--------|
| 1 | 12.522 | 303562  | 5.98   | 7687   |
| 2 | 28.703 | 4773118 | 94.02  | 41768  |

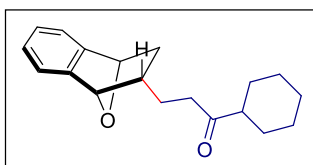

**1-cyclohexyl-3-((1*S*,2*S*,4*R*)-1,2,3,4-tetrahydro-1,4-epoxynaphthalen-2-yl)propan-1-one (3o):**

Colorless oil. Yield = 73%; 21 mg. er = 94.1:5.9, dr = >99:1

**R<sub>f</sub>** 0.4 (5% EtOAc in Hexane);

**<sup>1</sup>H NMR (500 MHz, CDCl<sub>3</sub>)** δ 7.23 – 7.18 (m, 2H), 7.15 – 7.11 (m, 2H), 5.35 (d, *J* = 5.3 Hz, 1H), 5.03 (s, 1H), 2.53 (t, *J* = 7.4 Hz, 2H), 2.39 – 2.31 (m, 1H), 1.98 – 1.91 (m, 1H), 1.86 – 1.74 (m, 5H), 1.69 – 1.64 (m, 2H), 1.61 – 1.59 (m, 1H), 1.36 – 1.18 (m, 6H).



$^{13}\text{C}$  NMR (126 MHz,  $\text{CDCl}_3$ )  $\delta$  213.8, 146.0, 145.8, 126.6, 119.0, 83.1, 79.5, 51.1, 40.1, 38.9, 34.6, 28.9, 28.7, 26.0, 25.8.

IR (ATR/ $\nu$   $\text{cm}^{-1}$ ): 2925, 2855, 1706, 1456.

HRMS (ESI-TOF):  $m/z$   $[\text{M}+\text{Na}]^+$  calculated for  $\text{C}_{19}\text{H}_{24}\text{O}_2\text{Na}^+$ : 307.1669, found 307.1682.

$[\alpha]_D^{25} = +37^\circ$  ( $c = 0.001$  in  $\text{CHCl}_3$ ).

HPLC Data: Daicel CHIRALPAK OD-H; hexane:  $i\text{PrOH} = 98:2$ ; detection wavelength = 264.0 nm; flow rate = 1.0 mL/min.  $t_R = 16.174$  min (major) and 14.193 min (minor), Enantiomeric ratio = 94.1:5.9.

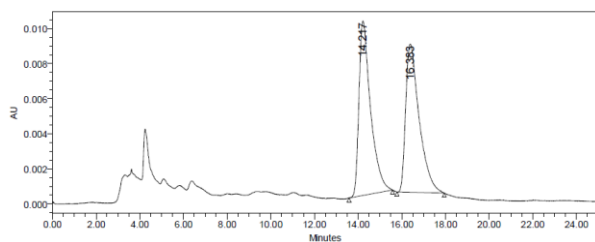

|   | RT     | Area   | % Area | Height |
|---|--------|--------|--------|--------|
| 1 | 14.217 | 371889 | 50.27  | 9954   |
| 2 | 16.383 | 367825 | 49.73  | 8482   |

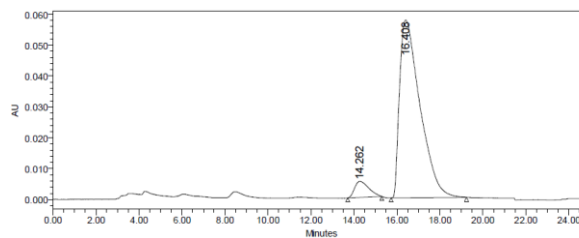

|   | RT     | Area    | % Area | Height |
|---|--------|---------|--------|--------|
| 1 | 14.262 | 237314  | 5.90   | 5199   |
| 2 | 16.408 | 3786743 | 94.10  | 57532  |

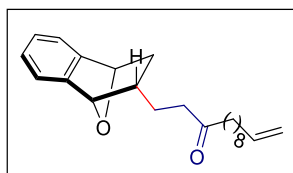

### 1-((1S,2S,4R)-1,2,3,4-tetrahydro-1,4-epoxynaphthalen-2-yl)tridec-12-en-3-one (3p):

Colorless oil. Yield = 62%; 21.2 mg. er = 94.9:5.1, dr = >99:1

$R_f$  0.5 (5% EtOAc in Hexane);

$^1\text{H}$  NMR (500 MHz,  $\text{CDCl}_3$ )  $\delta$  7.23 – 7.19 (m, 2H), 7.14 – 7.12 (m, 2H), 5.86 – 5.76 (m, 1H), 5.36 (d,  $J = 3.8$  Hz, 1H), 5.02 (s, 1H), 5.01 – 4.91 (m, 2H), 2.49 (t,  $J = 7.4$  Hz, 2H), 2.42 – 2.38 (m, 2H), 2.06 – 2.00 (m, 2H), 1.99 – 1.91 (m, 1H), 1.80 – 1.72 (m, 1H), 1.71 – 1.66 (m, 1H), 1.62 – 1.60 (m, 2H), 1.58 – 1.53 (m, 2H), 1.39 – 1.33 (m, 2H), 1.29 – 1.27 (m, 8H).

$^{13}\text{C}$  NMR (126 MHz,  $\text{CDCl}_3$ )  $\delta$  211.2, 146.2, 146.0, 139.6, 126.9, 119.2, 114.5, 83.3, 79.8, 43.3, 41.3, 40.4, 34.8, 34.2, 29.7, 29.7, 29.6, 29.4, 29.2, 24.3.

IR (ATR/ $\nu$   $\text{cm}^{-1}$ ): 2923, 2853, 1709, 1460.

HRMS (ESI-TOF):  $m/z$   $[\text{M}+\text{Na}]^+$  calculated for  $\text{C}_{23}\text{H}_{32}\text{O}_2\text{Na}^+$ : 363.2295, found 363.2318.

$[\alpha]_D^{25} = +23^\circ$  ( $c = 0.001$  in  $\text{CHCl}_3$ ).

HPLC Data: Daicel CHIRALPAK OD-H; hexane:  $i\text{PrOH} = 98:2$ ; detection wavelength = 264.0 nm; flow rate = 1.0 mL/min.  $t_R = 15.890$  min (major) and 14.230 min (minor), Enantiomeric ratio = 94.9:5.1.

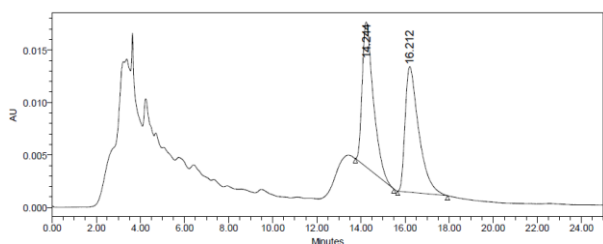

|   | RT     | Area   | % Area | Height |
|---|--------|--------|--------|--------|
| 1 | 14.244 | 487185 | 48.81  | 13815  |
| 2 | 16.212 | 510907 | 51.19  | 11977  |

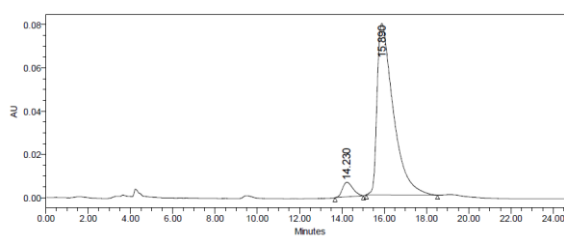

|   | RT     | Area    | % Area | Height |
|---|--------|---------|--------|--------|
| 1 | 14.230 | 228559  | 5.14   | 6750   |
| 2 | 15.890 | 4215099 | 94.86  | 79162  |

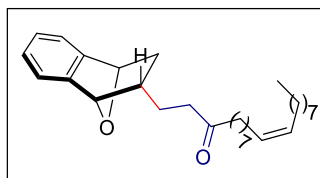

**(Z)-1-((1S,2S,4R)-1,2,3,4-tetrahydro-1,4-epoxynaphthalen-2-yl)icos-11-en-3-one-methane (1/1) (3q):**

Colorless oil. Yield = 68%; 29.8 mg. er = 89:11, dr = >99:1

$R_f$  0.4 (5 % EtOAc in Hexane);

$^1\text{H NMR}$  (500 MHz,  $\text{CDCl}_3$ )  $\delta$  7.23 – 7.19 (m, 2H), 7.15 – 7.12 (m, 2H), 5.39 – 5.31 (m, 3H), 5.02 (s, 1H), 2.49 (t,  $J = 7.5$  Hz, 2H), 2.40 (t,  $J = 7.5$  Hz, 2H), 2.03 – 1.99 (m, 4H), 1.97 – 1.91 (m, 1H), 1.80 – 1.73 (m, 1H), 1.71 – 1.66 (m, 1H), 1.61 – 1.58 (m, 4H), 1.35 – 1.26 (m, 20H), 0.88 (t,  $J = 6.7$  Hz, 3H).

$^{13}\text{C NMR}$  (126 MHz,  $\text{CDCl}_3$ )  $\delta$  211.0, 146.0, 145.8, 130.2, 129.9, 126.7, 119.0, 83.1, 79.5, 43.1, 41.1, 40.2, 34.6, 32.1, 30.0, 29.9, 29.7, 29.5, 29.4, 29.9, 29.1, 27.4, 27.4, 24.1, 22.9, 14.3.

**IR** (ATR/ $\nu$   $\text{cm}^{-1}$ ): 2936, 2868, 1709, 1460.

**HRMS (ESI-TOF):**  $m/z$   $[\text{M}+\text{Na}]^+$  calculated for  $\text{C}_{30}\text{H}_{46}\text{NO}_2\text{Na}^+$ : 461.3390, found 461.3403.

$[\alpha]_D^{25} = +21^\circ$  ( $c = 0.001$  in  $\text{CHCl}_3$ ).

**HPLC Data:** Daicel CHIRALPAK OD-H; hexane:  $i$ PrOH = 98:2; detection wavelength = 264.0 nm; flow rate = 1.0 mL/min.  $t_R = 12.080$  min (major) and 10.912 min (minor), Enantiomeric ratio = 89:11.

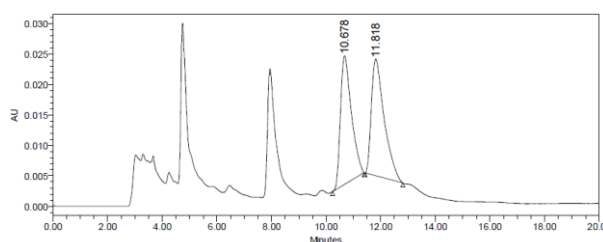

|   | RT     | Area   | % Area | Height |
|---|--------|--------|--------|--------|
| 1 | 10.678 | 582779 | 48.33  | 21077  |
| 2 | 11.818 | 623138 | 51.67  | 19110  |

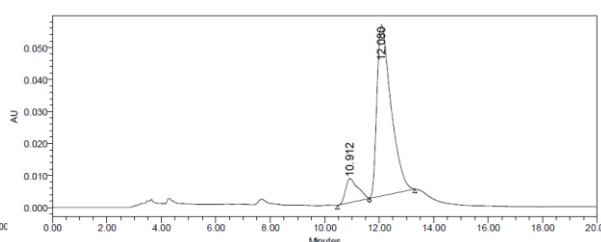

|   | RT     | Area    | % Area | Height |
|---|--------|---------|--------|--------|
| 1 | 10.912 | 237308  | 10.98  | 7533   |
| 2 | 12.080 | 1922998 | 89.02  | 53414  |

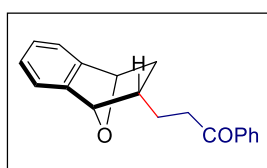

**1-phenyl-3-((1S,2S,4R)-1,2,3,4-tetrahydro-1,4-epoxynaphthalen-2-yl)propan-1-one (3r):<sup>1</sup>**

Colorless oil. Yield = 50%; 13.9 mg. er = 96.1:3.9, dr = >99:1

**R<sub>f</sub>** 0.4 (8% EtOAc in Hexane);

**<sup>1</sup>H NMR (500 MHz, CDCl<sub>3</sub>)** δ 7.97 (d, *J* = 8.5 Hz, 2H), 7.57 (t, *J* = 8.0 Hz, 1H), 7.47 (t, *J* = 7.7 Hz, 2H), 7.24 – 7.19 (m, 2H), 7.14 – 7.12 (m, 2H), 5.38 (t, *J* = 2.7 Hz, 1H), 5.09 (s, 1H), 3.07 (t, *J* = 7.4 Hz, 2H), 2.18 – 2.10 (m, 1H), 1.98 – 1.91 (m, 1H), 1.83 – 1.78 (m, 1H), 1.67 – 1.65 (m, 2H).

**<sup>13</sup>C NMR (126 MHz, CDCl<sub>3</sub>)** δ 200.0, 146.0, 145.7, 137.1, 133.2, 128.8, 128.2, 126.6, 119.0, 118.9, 83.1, 79.5, 40.2, 36.9, 34.7, 29.6.

**IR (ATR/v cm<sup>-1</sup>):** 2956, 2923, 2852, 1740, 1680, 1459.

**HRMS (ESI-TOF):** *m/z* [M+Na]<sup>+</sup> calculated for C<sub>19</sub>H<sub>18</sub>O<sub>2</sub>Na<sup>+</sup>: 301.1199, found 301.1204.

**[α]<sub>D</sub><sup>25</sup>** = +16° (c = 0.001 in CHCl<sub>3</sub>)

**HPLC Data:** Daicel CHIRALPAK OD-H; hexane: *i*PrOH = 90:10; detection wavelength = 239.1 nm; flow rate = 1.0 mL/min. *t<sub>R</sub>* = 15.093 min (major) and 13.211 min (minor), Enantiomeric ratio = 96.1:3.9.

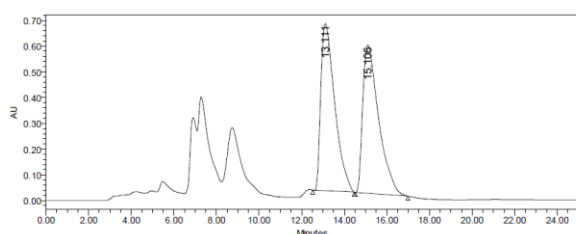

|   | RT     | Area     | % Area | Height |
|---|--------|----------|--------|--------|
| 1 | 13.111 | 29460245 | 49.62  | 649048 |
| 2 | 15.106 | 29914646 | 50.38  | 575379 |

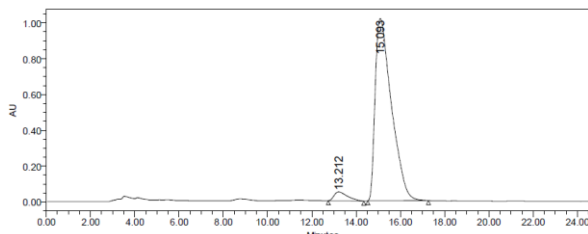

|   | RT     | Area     | % Area | Height  |
|---|--------|----------|--------|---------|
| 1 | 13.212 | 2117960  | 3.91   | 49835   |
| 2 | 15.093 | 52074969 | 96.09  | 1020316 |

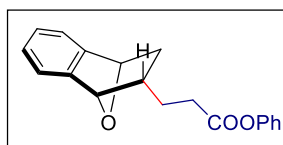

**phenyl 3-((1*S*,2*S*,4*R*)-1,2,3,4-tetrahydro-1,4-epoxynaphthalen-2-yl)propanoate (3s):**

Colorless oil. Yield = 56%; 16.5 mg. er = 82.5:17.5, dr = >99:1

**R<sub>f</sub>** 0.3 (5% EtOAc in Hexane)

**<sup>1</sup>H NMR (500 MHz, CDCl<sub>3</sub>)** δ 7.39 – 7.35 (m, 2H), 7.25 – 7.21 (m, 3H), 7.17 – 7.14 (m, 2H), 7.08 – 7.05 (m, 2H), 5.40 (d, *J* = 3.7 Hz, 1H), 5.11 (s, 1H), 2.73 – 2.62 (m, 2H), 2.19 – 2.12 (m, 1H), 2.01 – 1.94 (m, 1H), 1.86 – 1.80 (m, 1H), 1.70 – 1.68 (m, 2H).

**<sup>13</sup>C NMR (126 MHz, CDCl<sub>3</sub>)** δ 172.0, 150.9, 146.0, 145.7, 129.6, 126.8, 126.0, 121.7, 119.1, 83.0, 79.6, 40.2, 34.7, 33.1, 30.2.

**IR (ATR/v cm<sup>-1</sup>):** 2920, 2852, 1753, 1589, 1488, 1191.

**HRMS (ESI-TOF):** *m/z* [M+Na]<sup>+</sup> calculated for C<sub>19</sub>H<sub>18</sub>O<sub>3</sub>Na<sup>+</sup>: 317.1148, found 317.1154.

**[α]<sub>D</sub><sup>25</sup>** = +24° (c = 0.001 in CHCl<sub>3</sub>).

**HPLC Data:** Daicel CHIRALPAK IC-3; hexane: *i*PrOH = 70:30; detection wavelength = 264.0 nm; flow rate = 1.0 mL/min. *t<sub>R</sub>* = 21.628 min (major) and 12.797 min (minor), enantiomeric ratio = 82.5:17.5.

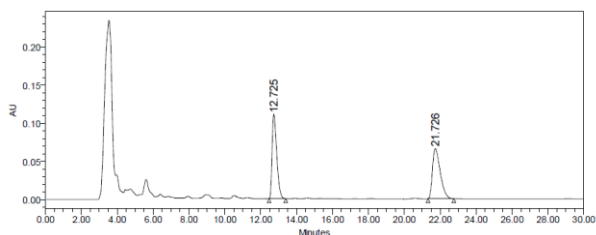

|   | RT     | Area    | % Area | Height |
|---|--------|---------|--------|--------|
| 1 | 12.725 | 1988683 | 50.09  | 110456 |
| 2 | 21.726 | 1981355 | 49.91  | 65650  |

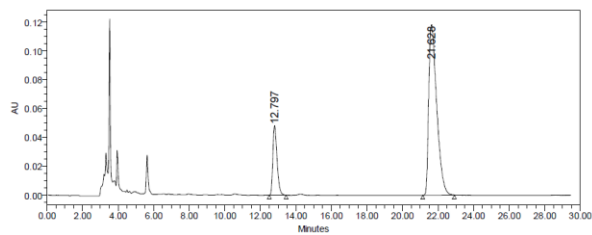

|   | RT     | Area    | % Area | Height |
|---|--------|---------|--------|--------|
| 1 | 12.797 | 783858  | 17.53  | 48040  |
| 2 | 21.628 | 3688134 | 82.47  | 118347 |

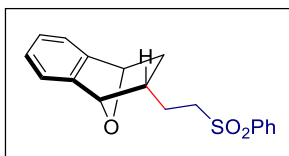

**(1S,2S,4R)-2-(2-(phenylsulfonyl)ethyl)-1,2,3,4-tetrahydro-1,4-epoxynaphthalene (3t):**

Colorless oil. Yield = 65%; 20.5 mg. er = 96:4, dr = >99:1

$R_f$  0.2 (20% EtOAc in Hexane);

$^1\text{H NMR}$  (500 MHz,  $\text{CDCl}_3$ )  $\delta$  7.94 – 7.92 (m, 2H), 7.69 – 7.65 (m, 1H), 7.61 – 7.56 (m, 2H), 7.21 – 7.18 (m, 2H), 7.15 – 7.12 (m, 2H), 5.34 (d,  $J = 4.9$  Hz, 1H), 4.98 (s, 1H), 3.17 (dd,  $J = 8.7, 7.5$  Hz, 2H), 2.13 – 2.04 (m, 1H), 1.96 – 1.88 (m, 1H), 1.84 – 1.78 (m, 1H), 1.64 – 1.60 (m, 1H), 1.56 – 1.51 (m, 1H).

$^{13}\text{C NMR}$  (126 MHz,  $\text{CDCl}_3$ )  $\delta$  145.5, 144.9, 139.0, 133.9, 129.4, 128.1, 126.7, 119.0, 82.6, 79.3, 54.8, 39.3, 34.2, 27.7.

IR (ATR/ $\nu$   $\text{cm}^{-1}$ ): 2928, 1735, 1459, 1443, 1306, 1145.

HRMS (ESI-TOF):  $m/z$   $[\text{M}+\text{Na}]^+$  calculated for  $\text{C}_{18}\text{H}_{18}\text{SO}_3\text{Na}^+$ : 337.0869, found 337.0881.

$[\alpha]_D^{25} = +36^\circ$  (c = 0.001 in  $\text{CHCl}_3$ ).

HPLC Data: Daicel CHIRALPAK OD-H; hexane:  $i$ PrOH = 60:40; detection wavelength = 264.0 nm; flow rate = 1.0 mL/min.  $t_R = 22.456$  min (major) and 11.638 min (minor), enantiomeric ratio = 96:4.

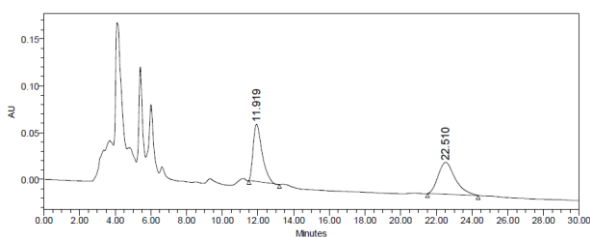

|   | RT     | Area    | % Area | Height |
|---|--------|---------|--------|--------|
| 1 | 11.919 | 2188623 | 49.07  | 61848  |
| 2 | 22.510 | 2271591 | 50.93  | 34184  |

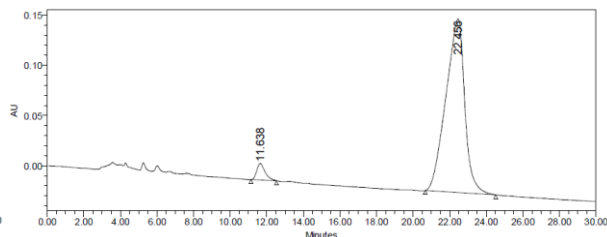

|   | RT     | Area     | % Area | Height |
|---|--------|----------|--------|--------|
| 1 | 11.638 | 517209   | 4.01   | 16315  |
| 2 | 22.456 | 12366357 | 95.99  | 172628 |

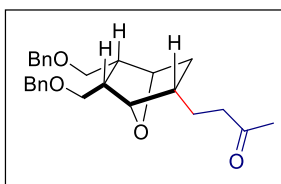

**4-((1S,2S,4R,5R,6S)-5,6-bis((benzyloxy)methyl)-7-oxabicyclo[2.2.1]heptan-2-yl)butan-2-one (5):**

Yellowish-dense liquid. Yield = 58%; 23.7 mg. er = 97.9:2.1, dr = >99:1

**R<sub>f</sub>** 0.3 (20% EtOAc in Hexane).

**<sup>1</sup>H NMR (500 MHz, CDCl<sub>3</sub>)** δ 7.37 – 7.31 (m, 4H), 7.30 – 7.26 (m, 6H), 4.50 – 4.42 (m, 5H), 4.11 (s, 1H), 3.44 – 3.41 (m, 2H), 3.34 – 3.31 (m, 2H), 2.40 (t, *J* = 7.4 Hz, 2H), 2.14 – 2.11 (m, 5H), 1.75 – 1.66 (m, 3H), 1.53 – 1.43 (m, 1H), 1.31 – 1.25 (m, 1H).

**<sup>13</sup>C NMR (126 MHz, CDCl<sub>3</sub>)** δ 208.8 (s, C=O), 138.4 (s, Ar), 128.6 (d, ArH), 127.9 (d, ArH), 127.7 (d, ArH), 83.2 (d, CH), 79.6 (d, CH), 73.4 (t, CH<sub>2</sub>), 69.1 (t, CH<sub>2</sub>), 69.0 (t, CH<sub>2</sub>), 46.0 (q, CH<sub>3</sub>), 45.9 (d, CH), 42.1 (t, CH<sub>2</sub>), 41.6 (d, CH), 37.0 (t, CH<sub>2</sub>), 30.0 (d, CH), 29.3 (t, CH<sub>2</sub>).

**IR (ATR/v cm<sup>-1</sup>):** 2930, 2865, 1740, 1719, 1451, 1368.

**HRMS (ESI-TOF):** *m/z* [M+Na]<sup>+</sup> calculated for C<sub>26</sub>H<sub>32</sub>O<sub>4</sub>Na<sup>+</sup>: 431.2193, found 431.2209.

**[α]<sub>D</sub><sup>25</sup>** = -12° (c = 0.001 in CHCl<sub>3</sub>).

**HPLC Data:** Daicel CHIRALPAK OJ-H; hexane: *i*PrOH = 50:50; detection wavelength = 258.0 nm; flow rate = 1.0 mL/min. *t<sub>R</sub>* = 11.837 min (major) and 10.356 min (minor), Enantiomeric ratio = 97.9:2.1.

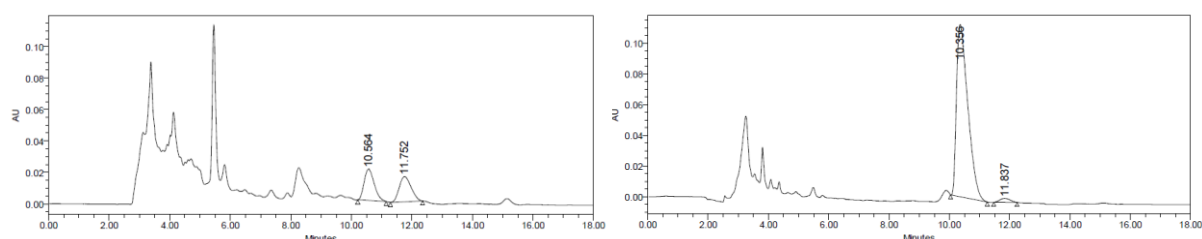

| RT | Area   | % Area | Height |       |
|----|--------|--------|--------|-------|
| 1  | 10.564 | 461994 | 51.54  | 19952 |
| 2  | 11.752 | 434464 | 48.46  | 15986 |

| RT | Area   | % Area  | Height |        |
|----|--------|---------|--------|--------|
| 1  | 10.356 | 2923414 | 97.89  | 112088 |
| 2  | 11.837 | 62990   | 2.11   | 2604   |

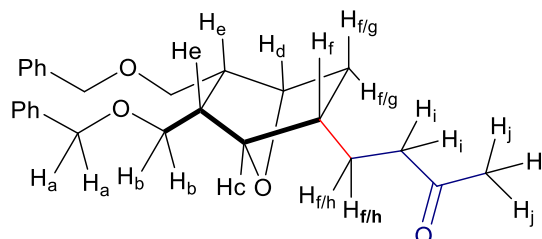

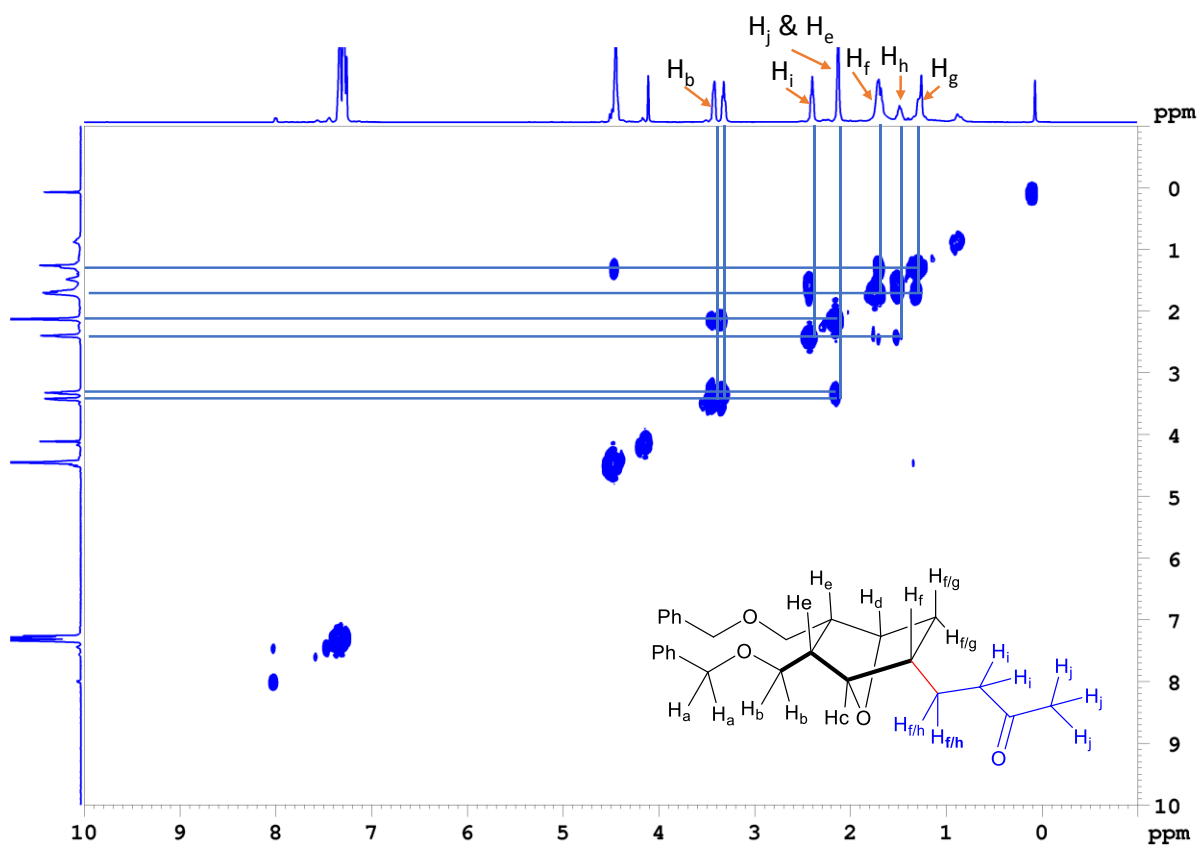

Figure S1. COSY for the adduct 5 in CDCl<sub>3</sub>

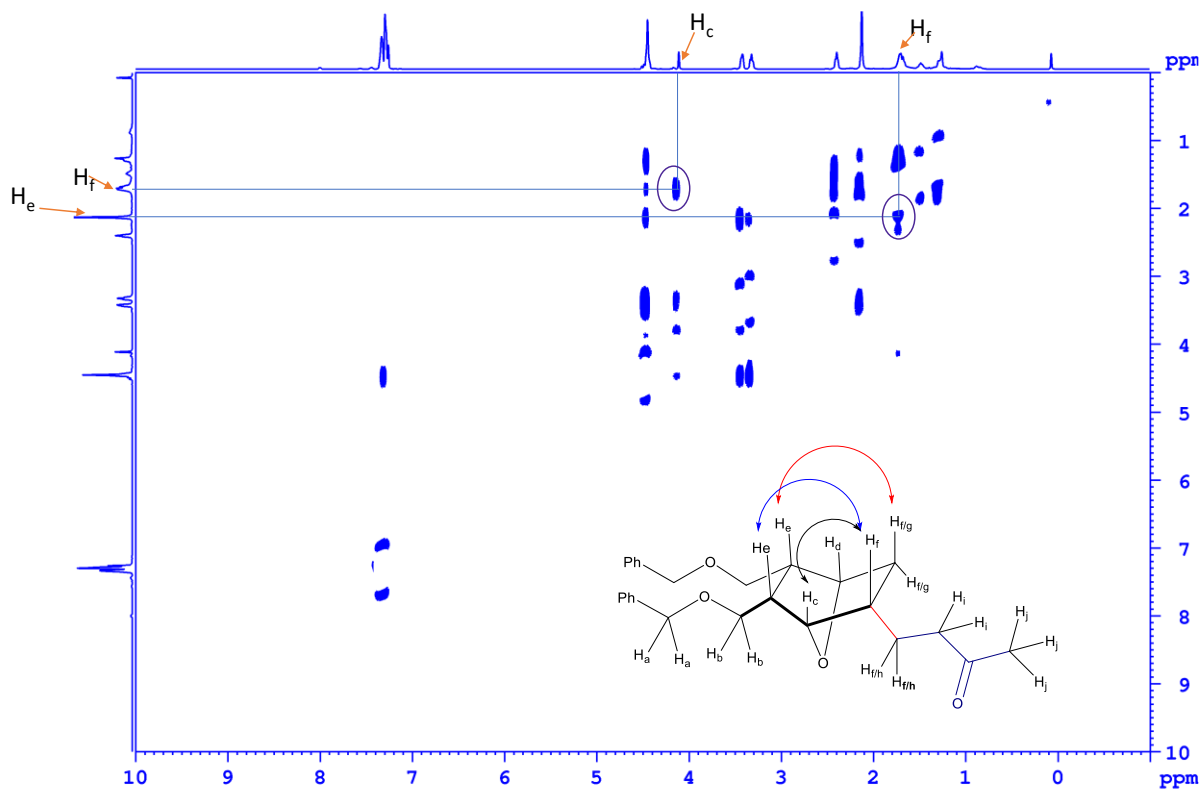

Figure S2. NOESY for the adduct 5 in CDCl<sub>3</sub>

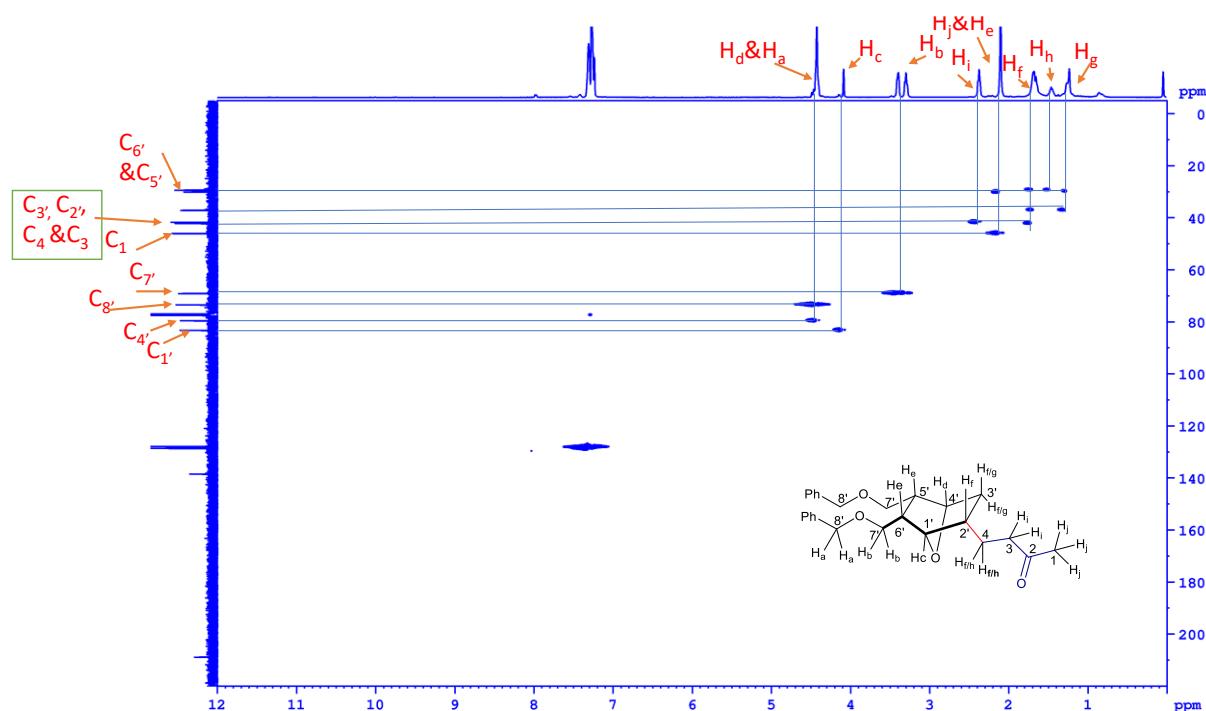

Figure S3. HSQC for the adduct **5** in  $\text{CDCl}_3$

## 5. Derivatization of the Asymmetric Products

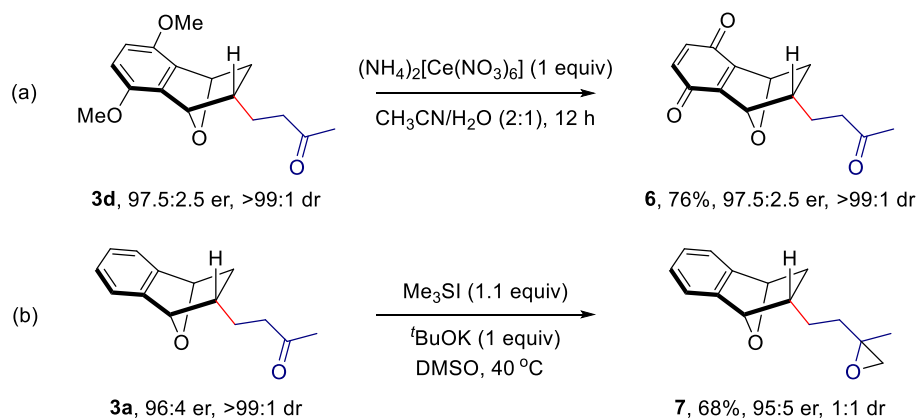

### a) CAN Oxidation of **3d**:

To the solution of **3d** (0.05 mmol; 13.8 mg) in MeCN-water (0.75 mL, 2:1), CAN (0.15 mmol; 83 mg) was added at 0 °C. The reaction mixture was allowed to stir at 24 °C for 12 h. The reaction mixture was quenched by saturated aq.  $\text{NaHCO}_3$  and extracted by ethyl acetate (3 x 10 mL). The combined organic layer was dried over anhydrous  $\text{Na}_2\text{SO}_4$ , filtered, and concentrated. The crude mixture was purified by flash column chromatography to yield **6**.<sup>2</sup>

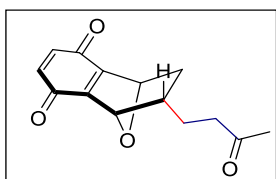

**(1*S*,2*S*,4*R*)-2-(3-oxobutyl)-1,2,3,4-tetrahydro-1,4-epoxynaphthalene-5,8-dione (6):**

Yellowish Solid. Yield = 76%; 19.0 mg. er = 97.8:2.2, dr = >99:1

$R_f$  0.3 (20 % EtOAc in Hexane)

$^1\text{H NMR}$  (500 MHz,  $\text{CDCl}_3$ )  $\delta$  6.61 (s, 2H), 5.40 (d,  $J = 0.9$  Hz, 1H), 5.08 (s, 1H), 2.54 (t,  $J = 7.4$  Hz, 2H), 2.16 (s, 3H), 1.91 – 1.77 (m, 3H), 1.72 – 1.68 (m, 1H), 1.64 – 1.61 (m, 1H).

$^{13}\text{C NMR}$  (126 MHz,  $\text{CDCl}_3$ )  $\delta$  207.9, 183.2, 183.1, 150.9, 150.7, 136.4, 136.3, 80.7, 41.8, 38.0, 32.1, 30.2, 28.1.

IR (ATR/ $\nu$   $\text{cm}^{-1}$ ): 2954, 2920, 2855, 1703, 1680, 1456, 1376.

HRMS (ESI-TOF):  $m/z$   $[\text{M}+\text{Na}]^+$  calculated for  $\text{C}_{14}\text{H}_{14}\text{O}_4\text{Na}^+$ : 269.0784, found 269.0789.

$[\alpha]_D^{25} = -1^\circ$  ( $c = 0.001$  in  $\text{CHCl}_3$ ).

**HPLC Data:** Daicel CHIRALPAK OD-H; hexane:  $i$ PrOH = 85:15; detection wavelength = 252.1 nm; flow rate = 1.0 mL/min.  $t_R = 19.940$  min (major) and 17.894 min (minor), enantiomeric ratio = 97.8:2.2.

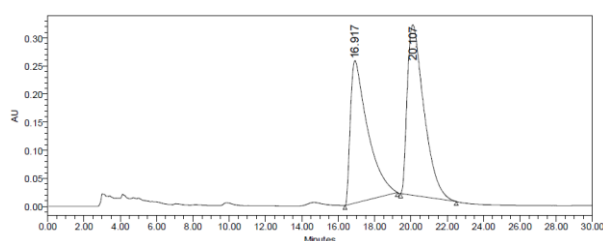

|   | RT     | Area     | % Area | Height |
|---|--------|----------|--------|--------|
| 1 | 16.917 | 16793367 | 46.44  | 253737 |
| 2 | 20.107 | 19364601 | 53.56  | 303403 |

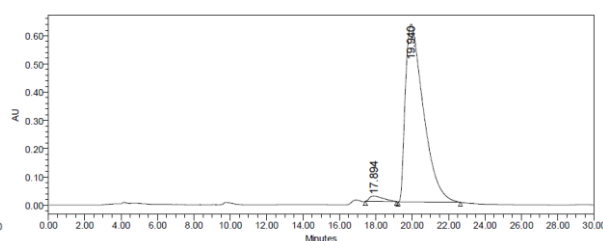

|   | RT     | Area     | % Area | Height |
|---|--------|----------|--------|--------|
| 1 | 17.894 | 985598   | 2.23   | 18418  |
| 2 | 19.940 | 43279438 | 97.77  | 628533 |

**b) Epoxidation of 3a:**

To a solution of  $t$ BuOK (1 equiv., 112 mg) in DMSO at room temperature, trimethyl sulphonium iodide (1.1 equiv., 121mg) was added and stirred for 30 minutes. Then a solution of **3a** (0.5 mmol, 108 mg) in DMSO was added and stirred overnight. After the completion of the reaction, it was quenched with water and extracted with ethyl acetate (3 x 10 mL). The combined organic layer was dried over anhydrous  $\text{Na}_2\text{SO}_4$ , filtered, and concentrated. The crude product was purified by flash column chromatography on silica gel with hexane and ethyl acetate mixture as eluent to afford the desired epoxidation product **7**.<sup>3</sup>

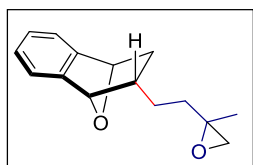

**(1*S*,2*S*,4*R*)-2-(2-(2-methyloxiran-2-yl)ethyl)-1,2,3,4-tetrahydro-1,4-epoxynaphthalene (7):**

Colourless oil. Yield = 68%; 15.7 mg. er = 95:5, dr = 1:1

$R_f$  0.3 (5% EtOAc in Hexane);

$^1\text{H NMR}$  (500 MHz,  $\text{CDCl}_3$ )  $\delta$  7.24 – 7.20 (m, 4H), 7.18 – 7.10 (m, 4H), 5.36 (s, 1H), 5.35 (s, 1H), 5.04 (s, 1H), 5.02 (s, 1H), 2.63 – 2.61 (m, 2H), 2.59 (d,  $J = 4.8$  Hz, 2H), 1.84 – 1.73 (m, 2H), 1.70 – 1.64 (m, 4H), 1.63 – 1.55 (m, 8H), 1.34 (s, 3H), 1.33 (s, 3H).

$^{13}\text{C NMR}$  (126 MHz,  $\text{CDCl}_3$ )  $\delta$  145.9, 145.8, 126.6, 126.6, 118.9, 118.9, 118.9, 83.6, 83.0, 79.5, 56.9, 56.9, 54.0, 40.7, 40.6, 35.4, 35.4, 34.8, 30.6, 21.1, 21.0.

IR (ATR/ $\nu$   $\text{cm}^{-1}$ ): 2923, 2858, 1727, 1462.

HRMS (ESI-TOF):  $m/z$   $[\text{M}+\text{Na}]^+$  calculated for  $\text{C}_{14}\text{H}_{14}\text{O}_4\text{Na}^+$ : 253.1199, found 253.1210.



$[\alpha]_D^{25} = +38^\circ$  ( $c = 0.001$  in  $\text{CHCl}_3$ ).

**HPLC Data:** Daicel CHIRALPAK IC-3; hexane:  $i$ PrOH = 60:40; detection wavelength = 264.0 nm; flow rate = 1.0 mL/min.  $t_R = 18.224$  min, 12.998 min (major) and 10.494 min, 11.627 min (minor), enantiomeric ratio = 95:5, diastereomeric ratio = 1:1.

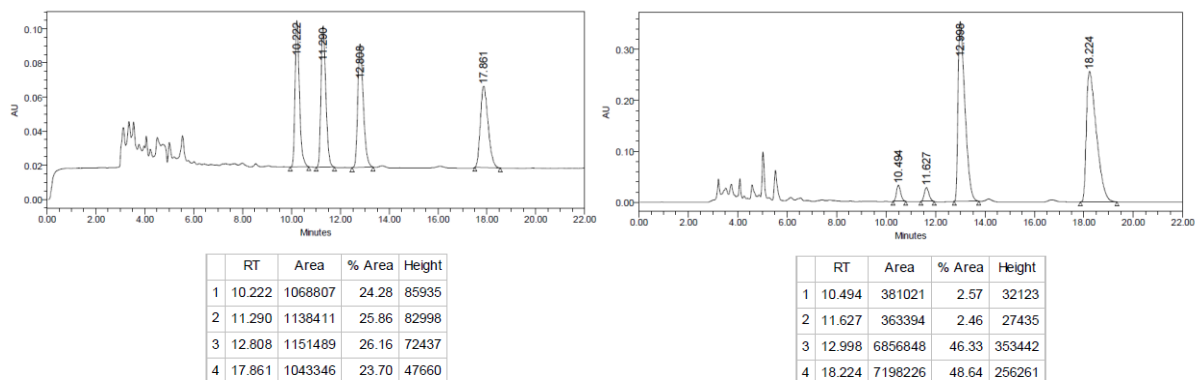

## 6. Synthesis of the starting materials:

### 6A. General procedure for the synthesis of Bicyclic alkene

#### A.

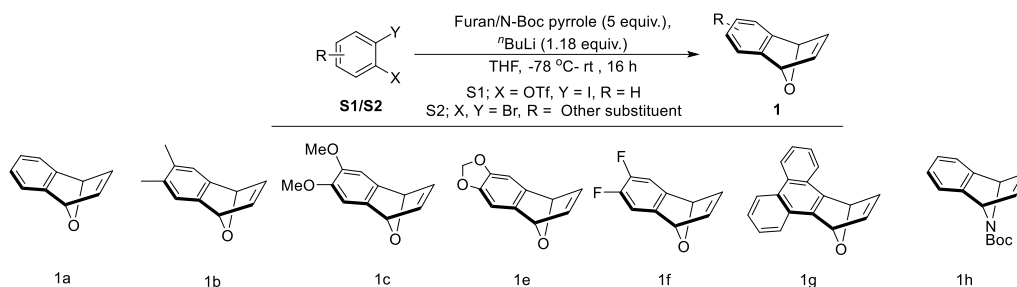

A 100 mL Schlenk tube equipped with a magnetic stir bar and **S1** or **S2** (3 mmol) was kept under vacuum for 10 minutes and purged with Ar by three times. Then furan (5 equiv., 1.2 mL) in THF/ $\text{Et}_2\text{O}$  (20 mL) was added, and the mixture was cooled to  $-78^\circ\text{C}$ .  $n$ BuLi (1.5 mL, 2 M in hexanes, 1.05 mmol) was added to the mixture dropwise, maintaining the reaction temperature. The reaction was stirred for 2 hours at  $-78^\circ\text{C}$  and then warmed to rt. After 16 h, the reaction mixture was quenched by the sat.  $\text{NH}_4\text{Cl}$  solution. The organic layer was separated, and the aqueous layer was extracted three times with DCM/ $\text{Et}_2\text{O}$ . The combined organic layers were washed with brine, dried over anhydrous  $\text{Na}_2\text{SO}_4$ , concentrated, and purified by column chromatography (EtOAc/hexane) on silica gel to yield the targeted starting material.<sup>4</sup>

## B.

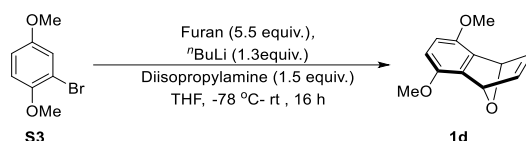

A 100 mL Schlenk tube equipped with a magnetic stir bar was kept under vacuum for 10 minutes and purged with Ar. Then diisopropylamine (1.5 equiv., 0.5 mL) in THF (4 mL) was added, and the solution was cooled to -78 °C. *n*BuLi (1.4 mL, 1.9 M in hexanes, 2.6 mmol) was added to the mixture dropwise. It was kept at -78 °C for 15 minutes. Then furan (5.5 equiv., 0.8 mL) was added dropwise. After 5 min, **S3** (2 mmol) in 1 mL THF was added to the mixture. The reaction was stirred for 2 hours at -78 °C and then warmed to rt. After 16 h, the reaction mixture was quenched by the sat. NH<sub>4</sub>Cl solution. The organic layer was separated, and the aqueous layer was extracted three times with DCM/Et<sub>2</sub>O. The combined organic layers were washed with brine, dried over Na<sub>2</sub>SO<sub>4</sub>, concentrated, and purified by column chromatography (EtOAc/hexane) on silica gel to yield the targeted starting material.<sup>5</sup>

## 6B. General procedure for the synthesis of $\alpha,\beta$ -unsaturated ketone:

### A.

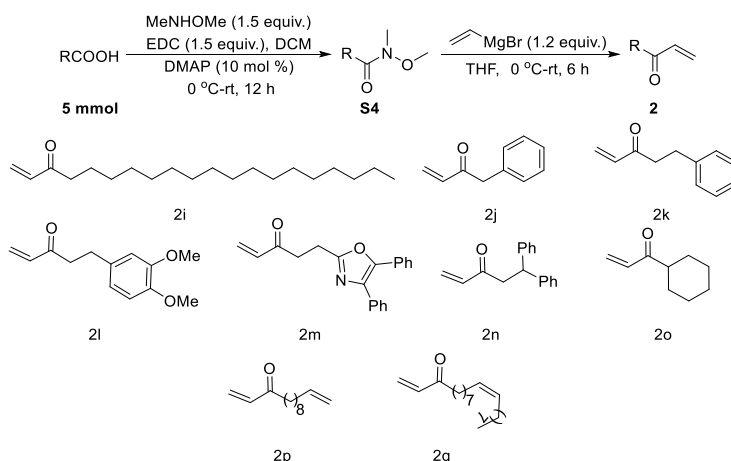

Carboxylic acid (5 mmol) and 4-dimethylaminopyridine (10 mol%) were dissolved in CH<sub>2</sub>Cl<sub>2</sub> (12.5 mL), and 1-(3-dimethylaminopropyl)-3-ethylcarbodiimide hydrochloride (1.5 equiv.) was added portion wise. The reaction mixture was stirred for 1h at rt. N,O-dimethyl hydroxylamine (1.5 equiv.) was added, and the mixture was stirred for 16 h at rt. After the completion of the reaction, water was added, and the aqueous layer was extracted with CH<sub>2</sub>Cl<sub>2</sub>. The combined organic layers were washed with saturated aq. NaHCO<sub>3</sub> and saturated aq. NaCl solutions, dried over anhydrous Na<sub>2</sub>SO<sub>4</sub>, and concentrated under reduced pressure. The crude product was purified by flash chromatography on silica, providing the desired Weinreb amide.<sup>6</sup> To the stirring solution of **S4** (4 mmol) in 6 mL anhydrous THF at <0 °C (ice-NaCl bath), a solution of vinyl magnesium bromide (1.2 equiv., 4.8 mmol, 1M in THF) was added dropwise. The resulting mixture was stirred at 0°C for 1h (white solid formed), then at rt for 4 h (the solid dissolved). The reaction was monitored by checking the TLC. After the completion of the reaction, saturated aq. NH<sub>4</sub>Cl solution was added, and the aqueous layer was extracted with diethyl ether. The combined organic layers were washed with saturated aq. NaCl and saturated

aq. NaCl solution, dried over anhydrous Na<sub>2</sub>SO<sub>4</sub>, and concentrated under reduced pressure. The crude product was purified by flash chromatography on silica, providing the desired  $\alpha,\beta$ -unsaturated ketone.<sup>7</sup>

## B.

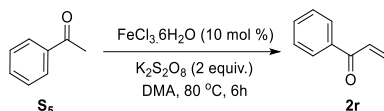

**S5** (1 mmol), FeCl<sub>3</sub>·6H<sub>2</sub>O (27 mg, 0.1 mmol), K<sub>2</sub>S<sub>2</sub>O<sub>8</sub> (540 mg, 2.0 mmol), and DMA (4.0 mL) were sequentially added to a 15 mL tube under air. The tube was sealed and stirred at 80 °C for 6 h. Upon completion (monitored by TLC), the resulting mixture was diluted with Et<sub>2</sub>O (15 mL) and washed with brine (10 mL × 3). The organic layer was dried over Na<sub>2</sub>SO<sub>4</sub>, filtered, and concentrated under reduced pressure. The crude product was purified via flash chromatography on silica gel (230-400 mesh) using hexane-EtOAc as eluent to yield the desired product **2r**.<sup>8</sup>

## 6C.

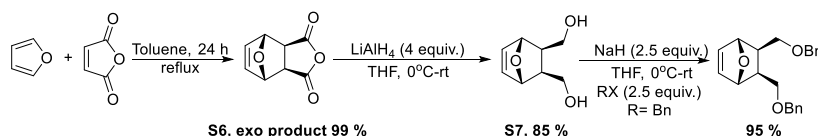

Maleic anhydride (5 mmol) and furan (1.5 equiv., 7.5 mmol) were dissolved in 10 mL of toluene. The resulting mixture was heated to reflux for 24 h. A white precipitate was formed. The reaction was cooled to rt. The solid was filtered with a Büchner funnel and washed with ether. After recrystallization from hexane-EtOAc, crystals were collected. Exo-cycloadduct **S6** (822 mg, 95%) was gained as a white powder and used without further purification.

**S6** (4.95 mmol) was dissolved in dry THF (10 mL) and kept at 0 °C. Then LiAlH<sub>4</sub> (4 equiv.) was added to the solution slowly under an argon atmosphere. The reaction was warmed to room temperature and stirred for 7 h. After the completion of the reaction, the reaction mixture was quenched by the saturated aq. NH<sub>4</sub>Cl solution, and extracted with EtOAc. Combined organic layers were washed with brine, dried over Na<sub>2</sub>SO<sub>4</sub>, and concentrated in vacuo. The crude product was purified via flash chromatography on silica gel (230-400 mesh) using hexane-EtOAc as eluent to yield the desired product **S7** (658 mg, 85%).

NaH (2.5 equiv.) was taken in a 50 mL RB with a magnetic stir bar and kept in a vacuum for 10 min. Then a solution of **S7** (1 equiv., 1.0 mmol) in dry THF was added slowly at 0 °C. A benzyl bromide (2.5 equiv., 2.5 mmol) was added after 30 minutes and kept at room temperature under an argon atmosphere overnight. After the completion of the reaction, it was quenched by the addition of water (5 mL), extracted with ether, dried over Na<sub>2</sub>SO<sub>4</sub>, and concentrated in vacuo. The crude product was purified via flash chromatography on silica gel (230-400 mesh) by using hexane-EtOAc as eluent to yield the desired product **4** (320 mg, 95%).<sup>9</sup>

## 7. Characterization data of starting materials:

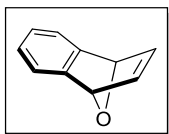

**1,4-dihydro-1,4-epoxynaphthalene (1a):** The above-targeted compound was prepared by following procedure **6A.A** from **S1**.<sup>4a</sup>

Colorless solid. Yield = 87 %; 376 mg.

*R<sub>f</sub>* 0.4 (5 % EtOAc in Hexane);

<sup>1</sup>H NMR (500 MHz, CDCl<sub>3</sub>) δ 7.27– 7.25 (m, 2H), 7.03 (t, J = 1.1 Hz, 2H), 6.99 – 6.97 (m, 2H), 5.72 (s, 2H).

<sup>13</sup>C NMR (126 MHz, CDCl<sub>3</sub>) δ 149.1, 143.1, 125.1, 120.4, 82.4.

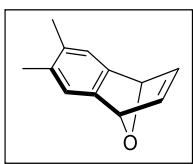

**6,7-dimethyl-1,4-dihydro-1,4-epoxynaphthalene (1b):** The above-targeted compound was prepared by following procedure **6A.A** from **S2b**.<sup>4b</sup>

White solid. Yield = 84 %; 432 mg.

*R<sub>f</sub>* 0.5 (3 % EtOAc in Hexane);

<sup>1</sup>H NMR (500 MHz, CDCl<sub>3</sub>) δ 7.06 (s, 2H), 7.00 (s, 2H), 5.66 (s, 2H), 2.20 (s, 6H).

<sup>13</sup>C NMR (126 MHz, CDCl<sub>3</sub>) δ 146.8, 143.2, 132.7, 122.3, 82.4, 19.9.

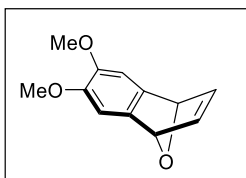

**6,7-dimethoxy-1,4-dihydro-1,4-epoxynaphthalene (1c):** The above-targeted compound was prepared by following procedure **6A.A** from **S2c**.<sup>4b</sup>

White solid. Yield = 63 %; 386 mg.

*R<sub>f</sub>* 0.3 (15 % EtOAc in Hexane);

<sup>1</sup>H NMR (500 MHz, CDCl<sub>3</sub>) δ 7.04 (s, 2H), 6.96 (s, 2H), 5.67 (s, 2H), 3.84 (s, 6H).

<sup>13</sup>C NMR (126 MHz, CDCl<sub>3</sub>) δ 145.9, 143.4, 141.8, 106.9, 82.6, 56.5.

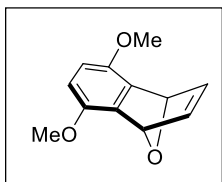

**5,8-dimethoxy-1,4-dihydro-1,4-epoxynaphthalene (1d):** The above-targeted compound was prepared by following procedure **6A.B** from **S3**.<sup>5</sup>

White solid. Yield = 86 %; 527 mg.

*R<sub>f</sub>* 0.3 (15% EtOAc in Hexane);

**<sup>1</sup>H NMR (500 MHz, CDCl<sub>3</sub>)** δ 7.07 (s, 2H), 6.54 (s, 2H), 5.93 (s, 2H), 3.79 (s, 6H).  
**<sup>13</sup>C NMR (126 MHz, CDCl<sub>3</sub>)** δ 148.1, 143.0, 137.7, 111.9, 80.5, 56.6.

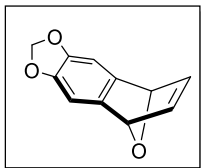

**5,8-dihydro-5,8-epoxynaphtho[2,3-d][1,3]dioxole (1e):** The above-targeted compound was prepared by following procedure **6A.A** from **S2e**.<sup>4b</sup>

Yield = 90 %; 508 mg.

*R<sub>f</sub>* 0.3 (5% EtOAc in Hexane);

**<sup>1</sup>H NMR (500 MHz, CDCl<sub>3</sub>)** δ 7.04 (s, 2H), 6.83 (s, 2H), 5.93 (s, 1H), 5.89 (s, 1H), 5.64 (s, 2H).

**<sup>13</sup>C NMR (126 MHz, CDCl<sub>3</sub>)** δ 144.6, 143.6, 143.5, 104.1, 101.4, 82.7.

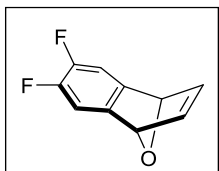

**6,7-difluoro-1,4-dihydro-1,4-epoxynaphthalene (1f):** The above-targeted compound was prepared by following procedure **6A.A** from **S2f**.<sup>4d</sup>

Yellow liquid. Yield = 62 %; 335 mg.

*R<sub>f</sub>* 0.6 (15% EtOAc in Hexane);

**<sup>1</sup>H NMR (500 MHz, CDCl<sub>3</sub>)** δ 7.07 (t, *J*<sub>F-H</sub> = 7.7 Hz, 2H), 7.03 (s, 2H), 5.69 (s, 2H).

**<sup>13</sup>C NMR (126 MHz, CDCl<sub>3</sub>)** δ 147.5 (dd, <sup>1</sup>*J*<sub>F-C</sub> = 248.22, <sup>2</sup>*J*<sub>F-C</sub> = 15.12 Hz), 145.3 (t, <sup>3</sup>*J*<sub>F-C</sub> = 5.04 Hz), 143.2, 110.9–110.0 (m), 82.3.

**<sup>19</sup>F NMR (471 MHz, CDCl<sub>3</sub>)** δ -142.30.

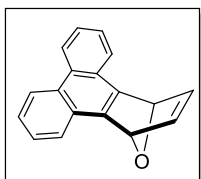

**1,4-dihydro-1,4-epoxytriphenylene (1g):** The above-targeted compound was prepared by following procedure **6A.A** from **S2g**.<sup>4c</sup>

White solid. Yield = 75 %; 550 mg.

*R<sub>f</sub>* 0.2 (5% EtOAc in Hexane);

**<sup>1</sup>H NMR (500 MHz, CDCl<sub>3</sub>)** δ 8.74 (d, *J* = 9.8 Hz, 2H), 7.95 (d, *J* = 9.5 Hz, 2H), 7.64 (d, *J* = 6.1 Hz, 4H), 7.29 (s, 2H), 6.40 (s, 2H).

**<sup>13</sup>C NMR (126 MHz, CDCl<sub>3</sub>)** δ 147.0, 144.1, 127.3, 126.8, 126.0, 123.6, 123.2, 103.2, 82.2.

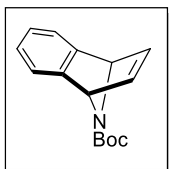

**Tert-butyl 1,4-dihydro-1,4-epiminonaphthalene-9-carboxylate (1h):** The above-targeted compound was prepared by following procedure **6A.A** from **S1h**.<sup>4a</sup>

Yellowish solid. Yield = 75 %; 547 mg.

$R_f$  0.3 (5% EtOAc in Hexane);

$^1\text{H NMR}$  (500 MHz,  $\text{CDCl}_3$ )  $\delta$  7.26 (s, 2H), 6.99 – 6.93 (m, 4H), 5.48 (s, 2H), 1.38 (s, 9H).

$^{13}\text{C NMR}$  (126 MHz,  $\text{CDCl}_3$ )  $\delta$  155.3, 148.5, 125.1, 121.1, 80.7, 66.3, 28.3.

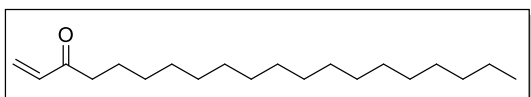

**Icos-1-en-3-one (2i):** The above-targeted compound was prepared by following procedure **6B.A** from **S4i**.<sup>6-7</sup>

White solid. Yield (50 %; 590 mg)

$R_f$  0.3 (2% EtOAc in Hexane);

$^1\text{H NMR}$  (500 MHz,  $\text{CDCl}_3$ )  $\delta$  6.35 (dd,  $J = 17.7, 10.5$  Hz, 1H), 6.21 (d,  $J = 17.7$  Hz, 1H), 5.81 (d,  $J = 11.9$  Hz, 1H), 2.57 (t,  $J = 7.4$  Hz, 2H), 1.64 – 1.58 (m, 2H), 1.55 (s, 2H), 1.25 (s, 26H), 0.88 (t,  $J = 6.8$  Hz, 3H).

$^{13}\text{C NMR}$  (126 MHz,  $\text{CDCl}_3$ )  $\delta$  201.3, 136.8, 127.9, 39.9, 32.1, 29.8, 29.7, 29.6, 29.5, 29.5, 29.4, 24.2, 22.8, 14.3.

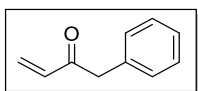

**1-phenylbut-3-en-2-one (2j):** The targeted compound was prepared by following procedure **6B.A** from **S4**.<sup>6-7</sup>

Colorless liquid. Yield (40 %; 234 mg).

$^1\text{H NMR}$  (500 MHz,  $\text{CDCl}_3$ )  $\delta$  7.33 (ddd,  $J = 7.5, 6.3, 1.4$  Hz, 2H), 7.29 – 7.25 (m, 1H), 7.23 – 7.20 (m, 2H), 6.41 (dd,  $J = 17.5, 10.4$  Hz, 1H), 6.31 (dd,  $J = 17.6, 1.3$  Hz, 1H), 5.83 (dd,  $J = 10.4, 1.4$  Hz, 1H), 3.88 (s, 2H).

$^{13}\text{C NMR}$  (126 MHz,  $\text{CDCl}_3$ )  $\delta$  197.9, 135.7, 134.2, 129.6, 129.2, 128.9, 127.1, 47.3.

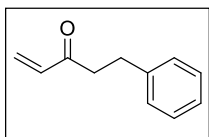

**5-phenylpent-1-en-3-one (2k):** The targeted compound was prepared by following procedure **6B.A** from **S4k**.<sup>6-7</sup>

Colorless liquid. Yield = 61 %, 385 mg.

$R_f$  0.3 (2% EtOAc in Hexane)

$^1\text{H NMR}$  (500 MHz,  $\text{CDCl}_3$ )  $\delta$  7.32 – 7.27 (m, 2H), 7.21 – 7.18 (m, 3H), 6.39 – 6.33 (m, 1H), 6.24 – 6.19 (m, 1H), 5.83 (d,  $J = 10.7$  Hz, 1H), 2.99 – 2.90 (m, 4H).

$^{13}\text{C}$  NMR (126 MHz,  $\text{CDCl}_3$ )  $\delta$  199.9, 141.2, 136.7, 128.7, 128.5, 128.3, 126.3, 41.4, 30.0.

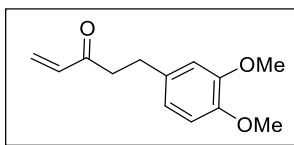

**5-(3,4-dimethoxyphenyl)pent-1-en-3-one (2l):** The above-targeted compound was prepared by following procedure **6B.A** from **S4l**.<sup>6-7</sup>

Colourless liquid. Yield = 55 %, 485 mg.

$R_f$  0.2 (5% EtOAc in Hexane);

$^1\text{H}$  NMR (500 MHz,  $\text{CDCl}_3$ )  $\delta$  6.80 – 6.78 (m, 1H), 6.73 (s, 2H), 6.43 – 6.30 (m, 1H), 6.23 – 6.19 (m, 1H), 5.83 (dd,  $J$  = 10.7, 2.6 Hz, 1H), 3.86 (s, 3H), 3.84 (s, 3H), 2.90 (bs, 4H).

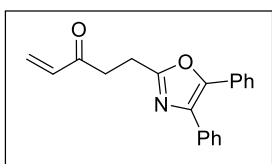

**5-(4,5-diphenyloxazol-2-yl)pent-1-en-3-one (2m):** The above-targeted compound was prepared by following procedure **6B.A** from **S4m**.<sup>6-7</sup>

Colourless liquid. Yield = 51 %, 619 mg.

$R_f$  0.3 (10% EtOAc in Hexane);

$^1\text{H}$  NMR (500 MHz,  $\text{CDCl}_3$ )  $\delta$  7.66 – 7.60 (m, 2H), 7.59 – 7.53 (m, 2H), 7.38 – 7.29 (m, 6H), 6.46 – 6.41 (m, 1H), 6.34 – 6.31 (m, 1H), 5.91 (dd,  $J$  = 10.5, 1.1 Hz, 1H), 3.24 – 3.18 (m, 4H).

$^{13}\text{C}$  NMR (126 MHz,  $\text{CDCl}_3$ )  $\delta$  198.4, 162.4, 145.4, 136.3, 135.1, 133.8, 129.0, 128.8, 128.7, 128.6, 128.5, 128.1, 128.0, 126.5, 36.7, 22.0.

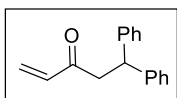

**5,5-diphenylpent-1-en-3-one (2n):** The above-targeted compound was prepared by following procedure **6B.A** from **S4n**.<sup>6-7</sup>

Colourless liquid. Yield = 65 %, 615 mg.

$R_f$  0.3 (3% EtOAc in Hexane);

$^1\text{H}$  NMR (500 MHz,  $\text{CDCl}_3$ )  $\delta$  7.35 – 7.25 (m, 8H), 7.24 – 7.19 (m, 2H), 6.39 – 6.34 (m, 1H), 6.24 (dd,  $J$  = 17.7, 1.1 Hz, 1H), 5.82 (dd,  $J$  = 10.6, 1.1 Hz, 1H), 4.73 (t,  $J$  = 7.5 Hz, 1H), 3.39 (d,  $J$  = 7.5 Hz, 2H).

$^{13}\text{C}$  NMR (126 MHz,  $\text{CDCl}_3$ )  $\delta$  198.5, 143.9, 136.5, 128.5, 128.3, 127.9, 127.8, 126.4, 45.9, 45.6.

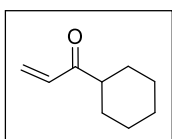

**1-cyclohexylprop-2-en-1-one (2o):** The above-targeted compound was prepared by following procedure **6B.A** from **S4o**.<sup>6-7</sup>

Colourless liquid. Yield = 58 %, 321 mg.

$R_f$  0.3 (2% EtOAc in Hexane);

$^1\text{H NMR}$  (500 MHz,  $\text{CDCl}_3$ )  $\delta$  6.44 – 6.37 (m, 1H), 6.23 (dd,  $J = 17.5, 1.5$  Hz, 1H), 5.72 (dd,  $J = 10.5, 1.5$  Hz, 1H), 2.63 – 2.56 (m, 1H), 1.83 – 1.76 (m, 4H), 1.67 (d,  $J = 12.4$  Hz, 1H), 1.40 – 1.19 (m, 5H).

$^{13}\text{C NMR}$  (126 MHz,  $\text{CDCl}_3$ )  $\delta$  203.5, 135.1, 127.8, 48.3, 28.6, 26.0, 25.8.

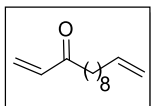

**trideca-1,12-dien-3-one (2p):** The above-targeted compound was prepared by following procedure **6B.A** from **S4p**.<sup>6-7</sup>

Colourless liquid. Yield = 52 %, 405 mg.

$R_f$  0.5 (3% EtOAc in Hexane);

$^1\text{H NMR}$  (500 MHz,  $\text{CDCl}_3$ )  $\delta$  6.34 (m, 1H), 6.20 (d,  $J = 17.7$  Hz, 1H), 5.85 – 5.74 (m, 2H), 5.02 – 4.88 (m, 2H), 2.56 (t,  $J = 7.5$  Hz, 2H), 2.05 – 2.00 (m, 2H), 1.63 – 1.59 (m, 2H), 1.39 – 1.35 (m, 2H), 1.28 (s, 8H).

$^{13}\text{C NMR}$  (126 MHz,  $\text{CDCl}_3$ )  $\delta$  201.2, 139.3, 136.7, 127.9, 114.3, 39.8, 33.9, 29.5, 29.4, 29.3, 29.2, 29.0, 24.1.

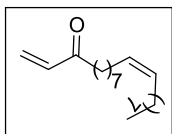

**(Z)-icosa-1,11-dien-3-one (2q):** The above-targeted compound was prepared by following procedure **6B.A** from **S4q**.<sup>6-7</sup>

Colourless liquid. Yield = 63 %, 737 mg.

$R_f$  0.5 (2% EtOAc in Hexane);

$^1\text{H NMR}$  (500 MHz,  $\text{CDCl}_3$ )  $\delta$  6.39 – 6.31 (m, 1H), 6.20 (d,  $J = 17.5$  Hz, 1H), 5.80 (d,  $J = 10.7$  Hz, 1H), 5.38 – 5.32 (m, 2H), 2.57 (t,  $J = 7.5$  Hz, 2H), 2.02 – 2.00 (m, 4H), 1.65 – 1.59 (m, 2H), 1.33 – 1.24 (m, 20H), 0.88 (t,  $J = 6.9$  Hz, 3H).

$^{13}\text{C NMR}$  (126 MHz,  $\text{CDCl}_3$ )  $\delta$  201.2, 136.8, 130.1, 129.9, 127.9, 39.8, 32.1, 29.9, 29.8, 29.7, 29.5, 29.4, 29.3, 27.4, 27.3, 24.2, 22.8, 14.2.

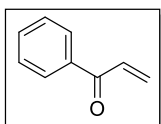

**1-phenylprop-2-en-1-one (2r):** The above-targeted compound was prepared by following procedure **6B.B** from **S4r**.<sup>8</sup>

Colourless liquid. Yield = 70 %, 93 mg.

$R_f$  0.4 (4% EtOAc in Hexane).



$^1\text{H NMR}$  (500 MHz,  $\text{CDCl}_3$ )  $\delta$  7.96 – 7.90 (m, 2H), 7.57 – 7.53 (m, 1H), 7.48 – 7.43 (m, 2H), 7.14 (dd,  $J$  = 17.0, 10.6 Hz, 1H), 6.45 – 6.40 (m, 1H), 5.93 – 5.88 (m, 1H).  
 $^{13}\text{C NMR}$  (126 MHz,  $\text{CDCl}_3$ )  $\delta$  191.0, 137.3, 133.0, 132.5, 130.1, 128.7, 128.6.

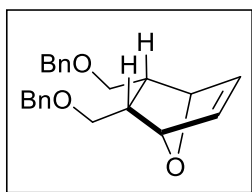

**(5S,6R)-5,6-bis((benzyloxy)methyl)-7-oxabicyclo[2.2.1]hept-2-ene (4):** The above-targeted compound was prepared by following procedure **6C** from **S7**.<sup>9</sup>

Colourless liquid. Yield = 95 %; 320.00 mg.

$R_f$  0.3 (5% EtOAc in Hexane).

$^1\text{H NMR}$  (500 MHz,  $\text{CDCl}_3$ )  $\delta$  7.38 – 7.28 (m, 10H), 6.36 (s, 2H), 4.89 (s, 2H), 4.55 – 4.47 (m, 4H), 3.62 – 3.57 (m, 2H), 3.42 – 3.57 (m, 2H), 1.98 (t,  $J$  = 6.3 Hz, 2H).

$^{13}\text{C NMR}$  (126 MHz,  $\text{CDCl}_3$ )  $\delta$  138.4, 135.7, 128.6, 127.9, 127.8, 80.9, 73.5, 70.0, 40.2.

## 8. Control Experiments and Mechanistic Studies:

### 8.1 Deuterium Scrambling Experiments

a)

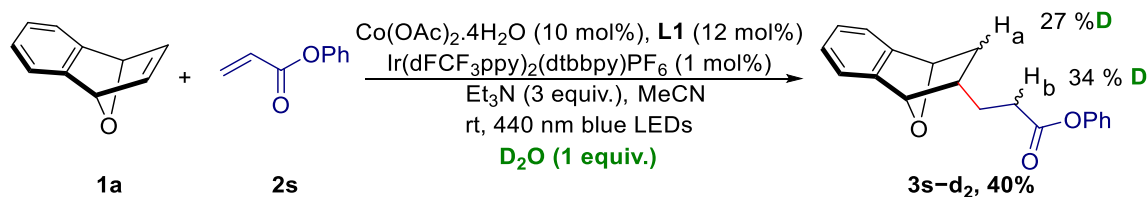

In an argon-filled glove box, a 15 mL reaction tube was charged with  $\text{Co}(\text{OAc})_2 \cdot 4\text{H}_2\text{O}$  (2 mg; 10 mol%) and (*S,S*)-L1 (5.6 mg; 12 mol%) in 1 mL dry acetonitrile. The mixture was stirred for 10 minutes. Then  $\text{Ir}(\text{dFCF}_3\text{ppy})_2(\text{dtbbpy})\text{PF}_6$  (1 mg; 1 mol%), triethyl amine (41  $\mu\text{L}$ ; 3 equiv.), **1a** (14.4 mg, 0.1 mmol) and **2a** (43  $\mu\text{L}$ ; 5 equiv.) were sequentially added into the tube. The tube was sealed and removed from the glove box. Then  $\text{D}_2\text{O}$  (1.8  $\mu\text{L}$ ; 1 equiv.) was added into the tube. The tube was sealed and removed from the glove box. Then the reaction tube was stirred for 24 hours under irradiation with 440 nm blue LEDs at room temperature. After completion of the reaction, the mixture was filtered through the small pad of silica gel with additional ethyl acetate and concentrated in vacuo. The crude product was purified by flash column chromatography on silica gel with hexane and Ethyl acetate as eluent to afford the desired reductive coupling product **3s-d<sub>2</sub>**. Deuterium incorporation was observed at 27% and 34% at 'a' and 'b' positions, respectively.

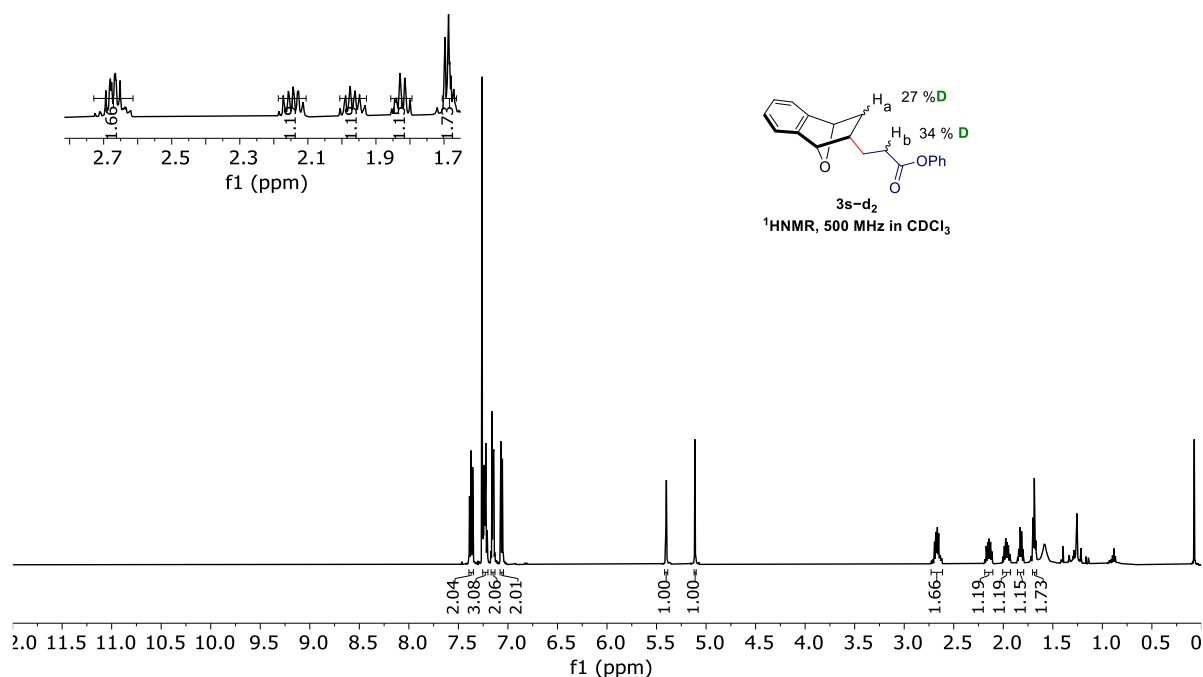

**Figure S4.**  $^1\text{H}$  NMR of **3s-d<sub>2</sub>** indicated 27% and 34% D incorporations at ‘a’ and ‘b’ positions, respectively.

b)

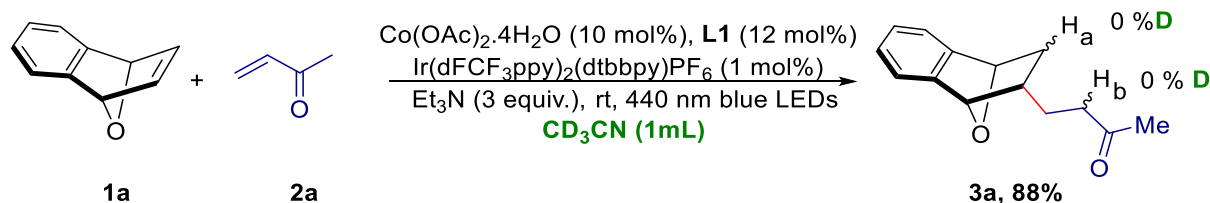

In an argon-filled glove box, a 15 mL reaction tube was charged with  $\text{Co}(\text{OAc})_2 \cdot 4\text{H}_2\text{O}$  (2 mg; 10 mol%) and (*S,S*)-L1 (5.6 mg; 12 mol%) in 1 mL  $\text{CD}_3\text{CN}$ . The mixture was stirred for 10 minutes. Then  $\text{Ir}(\text{dFCF}_3\text{ppy})_2(\text{dtbbpy})\text{PF}_6$  (1 mg; 1 mol%), triethyl amine (41  $\mu\text{L}$ ; 3 equiv.), **1a** (14.4 mg, 0.1 mmol) and **2a** (43  $\mu\text{L}$ ; 5 equiv.) were sequentially added into the tube. The tube was sealed and removed from the glove box. Then the reaction tube was stirred for 24 hours under irradiation with 440 nm blue LEDs at room temperature. After completion of the reaction, the mixture was filtered through the small pad of silica gel with additional ethyl acetate and concentrated in vacuo. The crude product was purified by flash column chromatography on silica gel with Hexane and Ethyl acetate as eluent to afford the desired reductive coupling product. Deuterium incorporation was not observed at ‘a’ and ‘b’ positions.

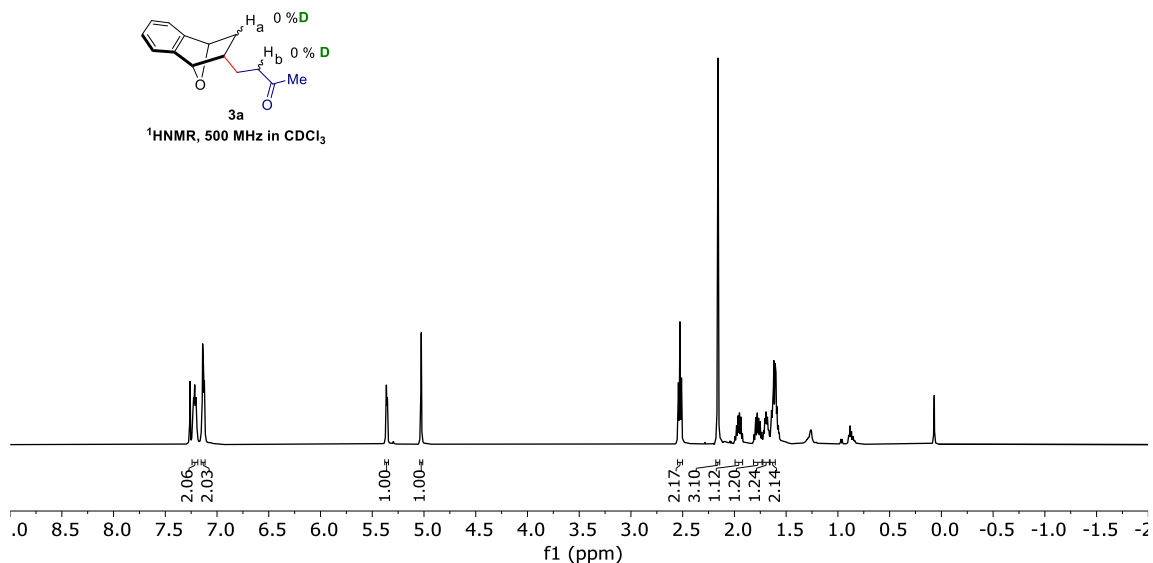

**Figure S5.**  $^1\text{H}$  NMR of **3a** indicated 0% D incorporations at ‘a’ and ‘b’ positions.

**c)**

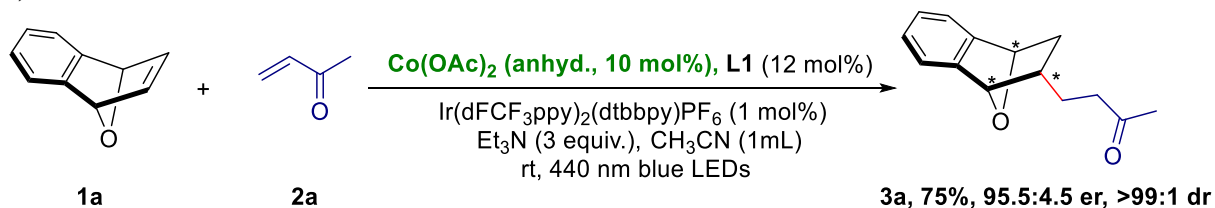

In a argon-filled glove box, a 15 mL reaction tube was charged with  $\text{Co(OAc)}_2$  (anhyd.) (1.7 mg; 10 mol%) and (*S,S*)-L1 (5.6 mg; 12 mol%) in 1 mL dry acetonitrile. The mixture was stirred for 10 minutes. Then  $\text{Ir(dFCF}_3\text{ppy)}_2\text{(dtbbpy)PF}_6$  (1 mg; 1 mol%), triethyl amine (41  $\mu\text{L}$ ; 3 equiv.), **1a** (14.4 mg, 0.1 mmol) and **2a** (43  $\mu\text{L}$ ; 5 equiv.) were sequentially added into the tube. The tube was sealed and removed from the glove box. Then the reaction tube was stirred for 24 hours under irradiation with 440 nm blue LEDs at room temperature. After completion of the reaction, the mixture was filtered through the small pad of silica gel with additional ethyl acetate and concentrated in vacuo. The crude product was purified by flash column chromatography on silica gel with Hexane and Ethyl acetate as eluent to afford the desired reductive coupling product **3a** in 75% yield, 95.5:4.5 er and >99:1 dr.

### 8.2 Light on-off experiment:

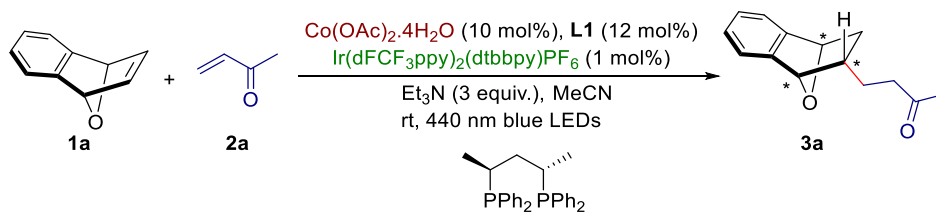

In an argon-filled glove box, a 15 mL reaction tube was charged with  $\text{Co(OAc)}_2 \cdot 4\text{H}_2\text{O}$  (2 mg; 10 mol%) and (*S,S*)-L1 (5.6 mg; 12 mol%) in 1 mL dry acetonitrile. The mixture was stirred for 10 minutes. Then  $\text{Ir(dFCF}_3\text{ppy)}_2\text{(dtbbpy)PF}_6$  (1 mg; 1 mol%), triethyl amine (41  $\mu\text{L}$ ; 3 equiv.),

**1a** (14.4 mg, 0.1 mmol) and **2a** (43  $\mu$ L; 5 equiv.) were sequentially added into the tube. The tube was sealed and removed from the glove box. Then the reaction tube was placed in light and dark for every alternative 20 min up to 2 hours. After every 20 min interval, the aliquot was taken out by a needle under the Ar atmosphere and quenched with water, the organic part was taken in EtOAc, and Gas chromatography was carried out. The yields were determined using 1,3,5-trimethoxy benzene as an internal standard.

**Table S8:**

| Entry | time (min) | Light source | GC yield (%) |
|-------|------------|--------------|--------------|
| 1     | 0          | --           | 0            |
| 2     | 20         | on           | 39           |
| 3     | 40         | off          | 39           |
| 4     | 60         | on           | 62.7         |
| 5     | 80         | off          | 62.8         |
| 6     | 100        | on           | 65.2         |
| 7     | 120        | off          | 65.5         |

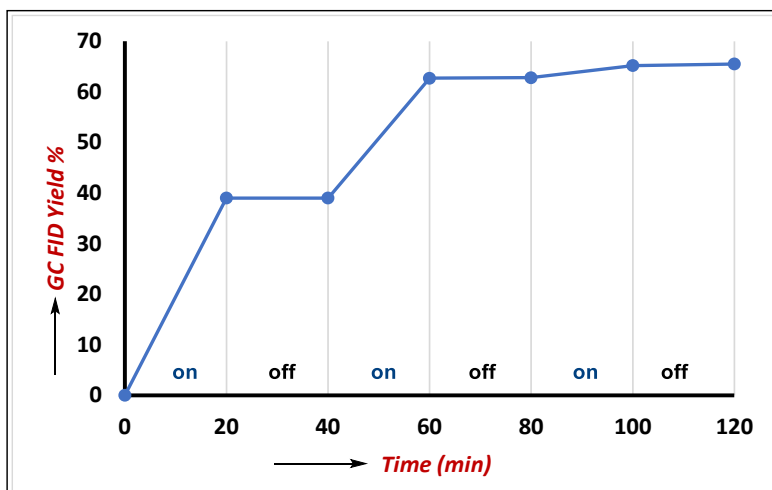

**Figure S6.** Reaction profile with the light on/off over time.

### 8.3 Stern-Vollmer fluorescence quenching studies

Rates of quenching ( $k_q$ ) were determined using Stern–Vollmer kinetics (eq. 1).

$$\frac{I_0}{I} = k_q \tau_0 [\text{Quencher}] + 1 \dots\dots (1)$$

Where  $I_0$  is the luminescence intensity without the quencher,  $I$  is the intensity with the quencher, and  $\tau_0$  is the lifetime of the photocatalyst (2300 ns for  $[\text{Ir}(\text{dFCF}_3\text{ppy})_2(\text{dtbbpy})\text{PF}_6]$  in acetonitrile).

Stern-Vollmer fluorescence quenching studies were carried out using a  $10^{-8}$  M solution of  $[\text{Ir}(\text{dFCF}_3\text{ppy})_2(\text{dtbbpy})\text{PF}_6]$  in acetonitrile and variable concentrations of triethyl amine ( $\text{Et}_3\text{N}$ ). The samples were prepared in 3.5 mL quartz cuvettes, equipped with PTFE stoppers, and sealed with Parafilm inside an argon-filled glove bag. The solutions were irradiated at 440nm, and the luminescence was measured at 472nm.

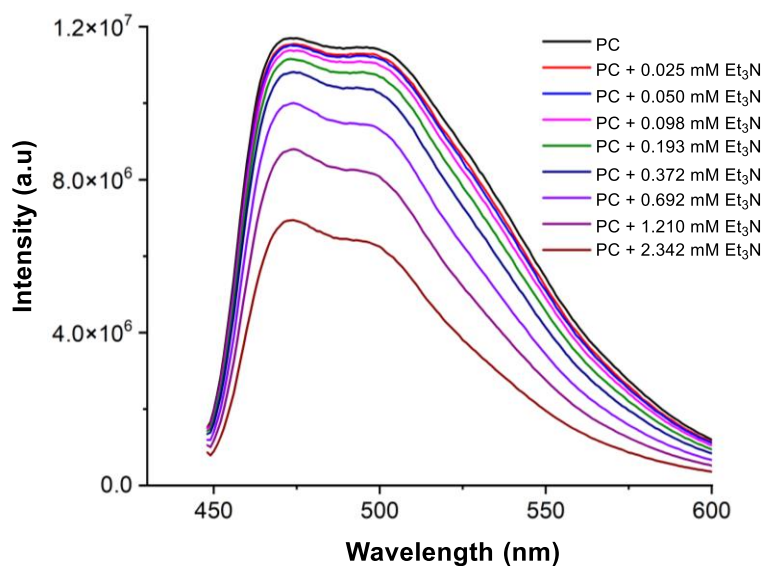

**Figure S7a.** Stern–Volmer Luminescence quenching experiment of  $\text{Ir}(\text{dFCF}_3\text{ppy})_2(\text{dtbbpy})\text{PF}_6$  with  $\text{NEt}_3$  in MeCN. The emission intensity of  $\text{Ir}(\text{dFCF}_3\text{ppy})_2(\text{dtbbpy})\text{PF}_6$  solution is strongly affected by the gradual increase of the amount of  $\text{NEt}_3$ .

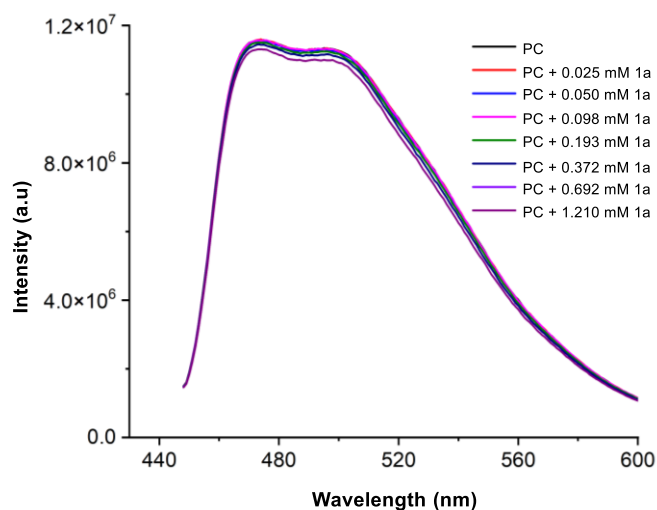

**Figure S7b.** Stern–Volmer Luminescence quenching experiment of  $\text{Ir}(\text{dFCF}_3\text{ppy})_2(\text{dtbbpy})\text{PF}_6$  with **1a** in MeCN. The emission intensity of  $\text{Ir}(\text{dFCF}_3\text{ppy})_2(\text{dtbbpy})\text{PF}_6$  solution was unaffected by the gradual increase of the amount of **1a**.

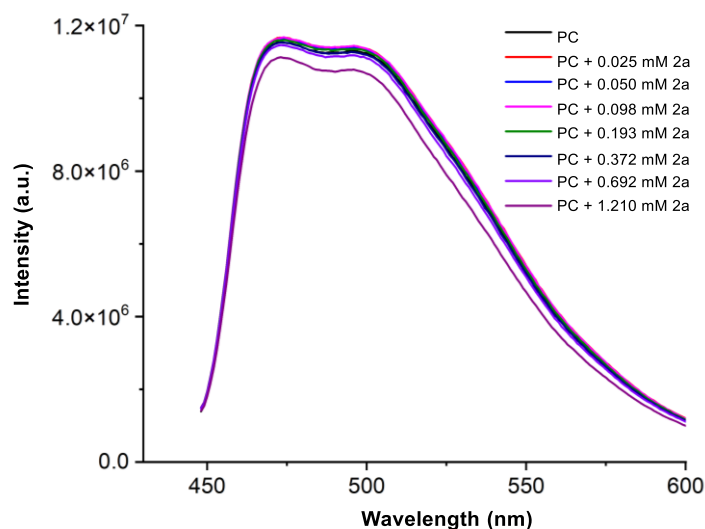

**Figure S7c.** Stern–Volmer Luminescence quenching experiment of Ir(dFCF<sub>3</sub>ppy)<sub>2</sub>(dtbbpy)PF<sub>6</sub> with **2a** in MeCN. The emission intensity of Ir(dFCF<sub>3</sub>ppy)<sub>2</sub>(dtbbpy)PF<sub>6</sub> solution was unaffected by the gradual increase of the amount of **2a**.

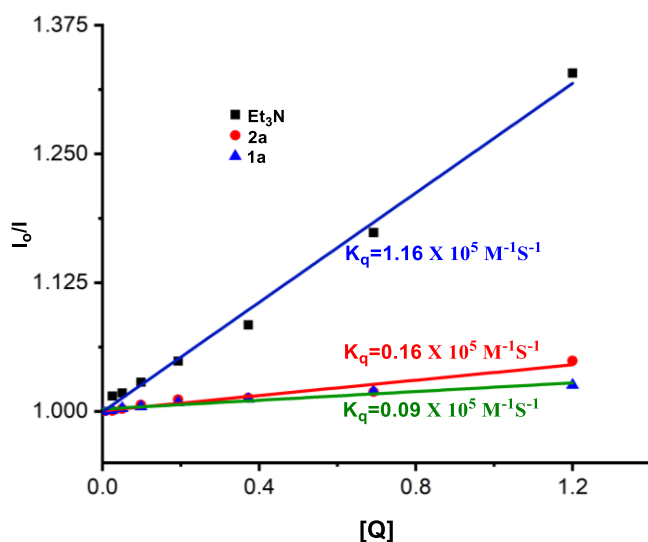

**Figure S7d.** Stern–Volmer Linear plot of Ir(dFCF<sub>3</sub>ppy)<sub>2</sub>(dtbbpy)PF<sub>6</sub> at a variable concentration of Et<sub>3</sub>N, **1a** and **2a**.

A linear Stern-Volmer plot was obtained at the variable concentration of Et<sub>3</sub>N. From the plot  $k_q = 1.16 \times 10^5 \text{ M}^{-1} \text{ s}^{-1}$  was obtained.

A similar experiment was repeated against variable concentrations of oxabicyclic alkene. Relatively no quenching was observed, and a linear Stern-Volmer plot was drawn with  $k_q = 0.091 \times 10^5 \text{ M}^{-1} \text{ s}^{-1}$ .

A similar experiment was repeated against variable concentrations of methyl vinyl ketone. No quenching was observed, and a linear Stern-Volmer plot was drawn with  $k_q = 0.16 \times 10^5 \text{ M}^{-1} \text{ s}^{-1}$ .

#### 8.4 Cyclic Voltammetry:

Glassy Carbon, Platinum (Pt) wire, Ag/AgCl (aqueous, saturated KCl) electrodes were used as the working, counter, and reference electrodes, respectively. Cyclic Voltammetry was carried out in CHI-660 potentiostat workstation at a rate of 0.1 V/s in acetonitrile with 0.1 M tetrabutylammonium hexafluorophosphate as a supporting electrolyte. Ag/AgCl electrode was standardized using ferrocene. To convert the potentials from Ag/AgCl (non-aqueous) to SCE, the potential for ferrocene was measured under the above conditions in CH<sub>3</sub>CN, and 0.450 V was added from the measured values. The whole solution was degassed with nitrogen bubbling to remove the dissolved oxygen. The Co(OAc)<sub>2</sub>·4H<sub>2</sub>O·(S,S)-bdpp complex was formed in situ by adding Co(OAc)<sub>2</sub>·4H<sub>2</sub>O (0.01 mmol) and (S,S)-bdpp (0.012 mmol) into acetonitrile (3 mL). The solutions were stirred for 2 h in Ar filled glove box. As shown in Figure S7, the first reduction peak [ $E_{1/2}(\text{Co(II)/Co(I)}) = -0.87 \text{ V vs SCE}$  in MeCN] of the red-coloured cyclic voltammogram is corresponding to the Co(II)/Co(I) couple of Co(OAc)<sub>2</sub>·4H<sub>2</sub>O·(S,S)-bdpp complex. Based on the earlier literature, the reduction potential of Ir(dFCF<sub>3</sub>ppy)<sub>2</sub>(dtbbpy)PF<sub>6</sub> [ $E_{1/2}(\text{Ir(III)/Ir(II)}) = -1.37 \text{ V vs SCE}$  in MeCN] is  $-1.37 \text{ V vs SCE}$  in MeCN. The reduced Ir(II) spontaneously undergoes a single electron transfer (SET) to reduce the diphosphine coordinated Co(II) complex [ $E_{1/2}(\text{Ir(III)/Ir(II)}) = -1.37 \text{ V}$ ,  $E_{1/2}(\text{Co(II)/Co(I)}) = -0.87 \text{ V vs SCE}$  in MeCN] and regenerates Ir(III) and produces the low valent Co(I) complex.

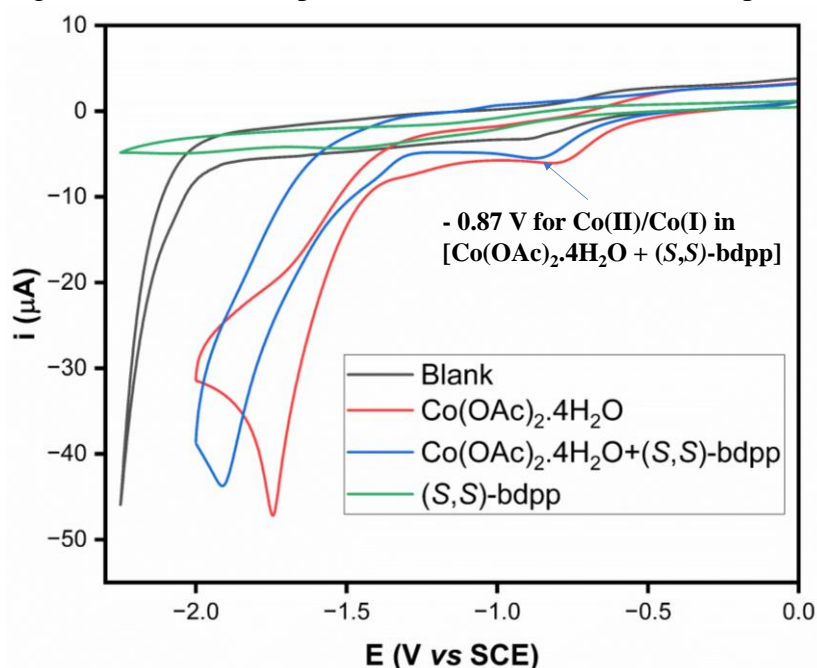

**Figure S8.** Reductive Cyclic Voltammogram of blank, Co(OAc)<sub>2</sub>·4H<sub>2</sub>O, (S,S)-bdpp ligand and the Co(OAc)<sub>2</sub>·4H<sub>2</sub>O in presence of (S,S)-bdpp in MeCN.

## 9. Scale-up experiment:

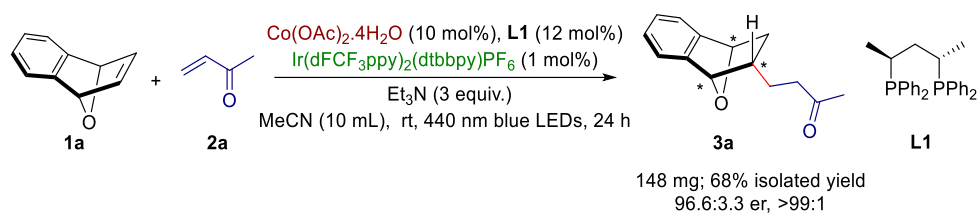

In an argon-filled glove box, a 50 mL Schenk RB was charged with  $\text{Co}(\text{OAc})_2 \cdot 4\text{H}_2\text{O}$  (20 mg; 10 mol%) and (*S,S*)-L1 (53 mg; 12 mol%) in 10 mL dry acetonitrile. The mixture was stirred for 10 min. Then  $\text{Ir}(\text{dFCF}_3\text{ppy})_2(\text{dtbbpy})\text{PF}_6$  (10 mg; 1 mol%), triethyl amine (418  $\mu\text{L}$ ; 3 equiv.), **1a** (144.17 mg, 1 mmol) and **2a** (416  $\mu\text{L}$ ; 5 equiv.) were sequentially added into the RB. The RB was sealed and removed from the glove box. Then the reaction vessel was stirred for 24 h under irradiation with 440 nm blue LEDs at room temperature. After completion of the reaction, the mixture was filtered through the small pad of silica gel with additional ethyl acetate and concentrated in vacuo. The crude product was purified by flash column chromatography on silica gel with Hexane and Ethyl acetate as eluent to afford the desired reductive coupling product. Then, the enantiomeric ratio was checked by the chiral HPLC stationary phase column.

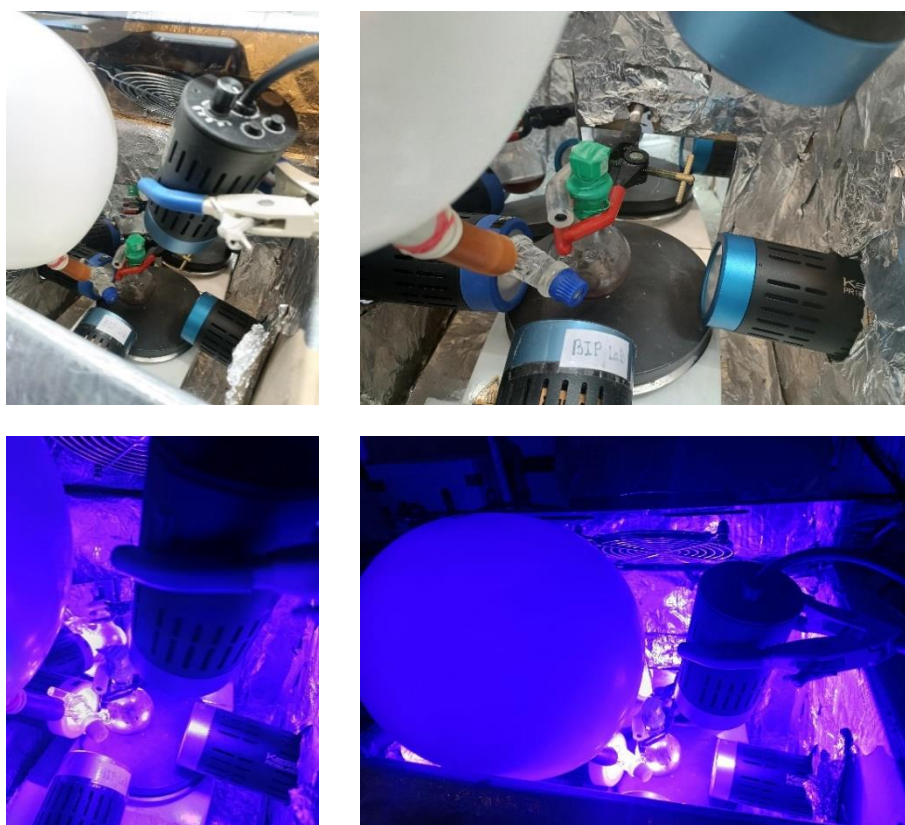

Figure S8: Reaction set-up for the scale-up reaction.



## 10. Crystal Data of 3h:

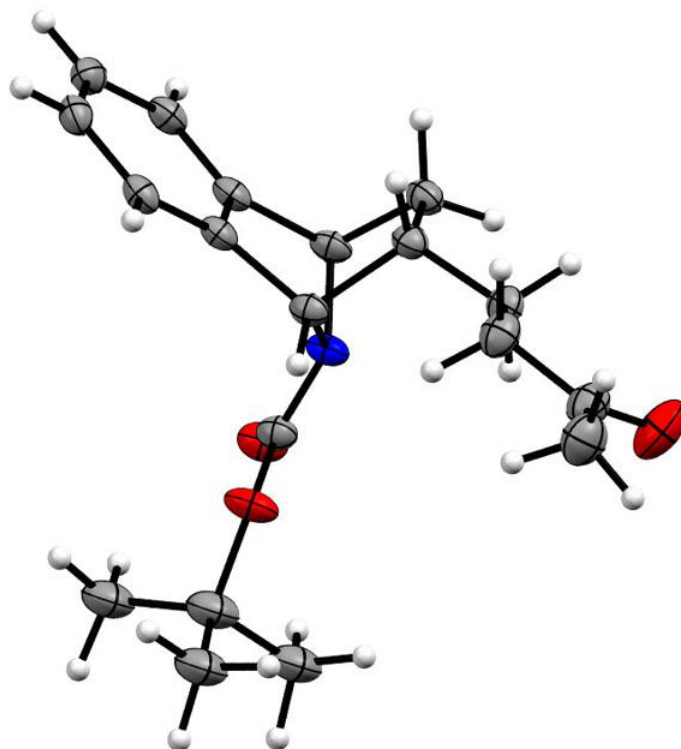

CCDC: 2268782.

**Figure S9:** Molecular structure for compound **3h**. Crystallization procedure: 10.0 mg solid compound was taken in a glass vial and dissolved in 0.5 mL hexane. It was kept in another glass vial containing 0.5 mL pentane and was capped tightly. It was allowed for slow diffusion at 1 °C. Its melting point is in range 61-63 °C.

**Table S9: Crystal data and structure refinement for 3h\_auto.**

|                                    |                                                 |
|------------------------------------|-------------------------------------------------|
| Identification code                | “3h”auto                                        |
| Empirical formula                  | C <sub>19</sub> H <sub>25</sub> NO <sub>3</sub> |
| Formula weight                     | 315.40                                          |
| Temperature/K                      | 100.3(9)                                        |
| Crystal system                     | orthorhombic                                    |
| Space group                        | P2 <sub>1</sub> 2 <sub>1</sub> 2 <sub>1</sub>   |
| a/Å                                | 6.13080(10)                                     |
| b/Å                                | 11.62940(10)                                    |
| c/Å                                | 25.4879(3)                                      |
| α/°                                | 90                                              |
| β/°                                | 90                                              |
| γ/°                                | 90                                              |
| Volume/Å <sup>3</sup>              | 1817.22(4)                                      |
| Z                                  | 4                                               |
| ρ <sub>calc</sub> /cm <sup>3</sup> | 1.153                                           |
| μ/mm <sup>-1</sup>                 | 0.618                                           |

|                                             |                                                               |
|---------------------------------------------|---------------------------------------------------------------|
| F(000)                                      | 680.0                                                         |
| Crystal size/mm <sup>3</sup>                | 0.5 × 0.05 × 0.01                                             |
| Radiation                                   | Cu Kα (λ = 1.54184)                                           |
| 2θ range for data collection/°              | 6.936 to 135.98                                               |
| Index ranges                                | -7 ≤ h ≤ 7, -13 ≤ k ≤ 13, -30 ≤ l ≤ 30                        |
| Reflections collected                       | 21967                                                         |
| Independent reflections                     | 3309 [R <sub>int</sub> = 0.0683, R <sub>sigma</sub> = 0.0304] |
| Data/restraints/parameters                  | 3309/0/194                                                    |
| Goodness-of-fit on F <sup>2</sup>           | 1.022                                                         |
| Final R indexes [I ≥ 2σ(I)]                 | R <sub>1</sub> = 0.0424, wR <sub>2</sub> = 0.1044             |
| Final R indexes [all data]                  | R <sub>1</sub> = 0.0437, wR <sub>2</sub> = 0.1055             |
| Largest diff. peak/hole / e Å <sup>-3</sup> | 0.28/-0.48                                                    |
| Flack parameter                             | -0.04(11)                                                     |

## 11. Unsuccessful Substates:

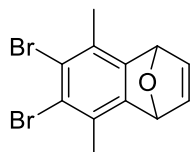

Debrominated pdt

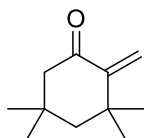

mostly ring opening pdt

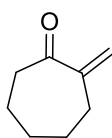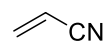

10 % pdt  
and the er is n.d

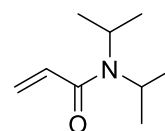

no pdt formation

## 12. Reference:

1. J. Yang, Y. Sekiguchi and N. Yoshikai, *ACS Catal.*, 2019, **9**, 5638-5644.
2. Y. Huang, C. Ma, Y. X. Lee, R.-Z. Huang and Y. Zhao, *Angew. Chem. Int. Ed.*, 2015, **54**, 13696-13700.
3. A. J. Day, T. C. Jenkins, M. Kischkewitz, K. E. Christensen, D. L. Poole and T. J. Donohoe, *Org. Lett.*, 2023, **25**, 614-618.
4. (a) T. Matsumoto, T. Hosoya, M. Katsuki and K. Suzuki, *Tetrahedron Lett.*, 1991, **32**, 6735-6736; (b) R. Luo, J. Liao, L. Xie, W. Tang and A. S. C. Chan, *Chem. Commun.*, 2013, **49**, 9959-9961; (c) M. Mansø, L. Fernandez, Z. Wang, K. Moth-Poulsen and M. B. Nielsen, *Journal*, 2020, **25**; (d) M. Davoust, J. A. Kitching, M. J. Fleming and M. Lautens, *Chem. Eur. J.*, 2010, **16**, 50-54.
5. K. Yoshida, T. Toyoshima, N. Akashi, T. Imamoto and A. Yanagisawa, *Chem. Commun.*, 2009, DOI: 10.1039/B902602A, 2923-2925.
6. Y. Tan, W. Yuan, L. Gong and E. Meggers, *Angew. Chem. Int. Ed.*, 2015, **54**, 13045-13048.
7. S. Chanthamath, S. Takaki, K. Shibatomi and S. Iwasa, *Angew. Chem. Int. Ed.*, 2013, **52**, 5818-5821.
8. Y.-M. Li, S.-J. Lou, Q.-H. Zhou, L.-W. Zhu, L.-F. Zhu and L. Li, *Eur. J. Org. Chem.*, 2015, **2015**, 3044-3047.
9. A. Köse, *J. Heterocycl. Chem.*, 2021, **58**, 1171-1178.

### 13. Copies of NMR Spectra

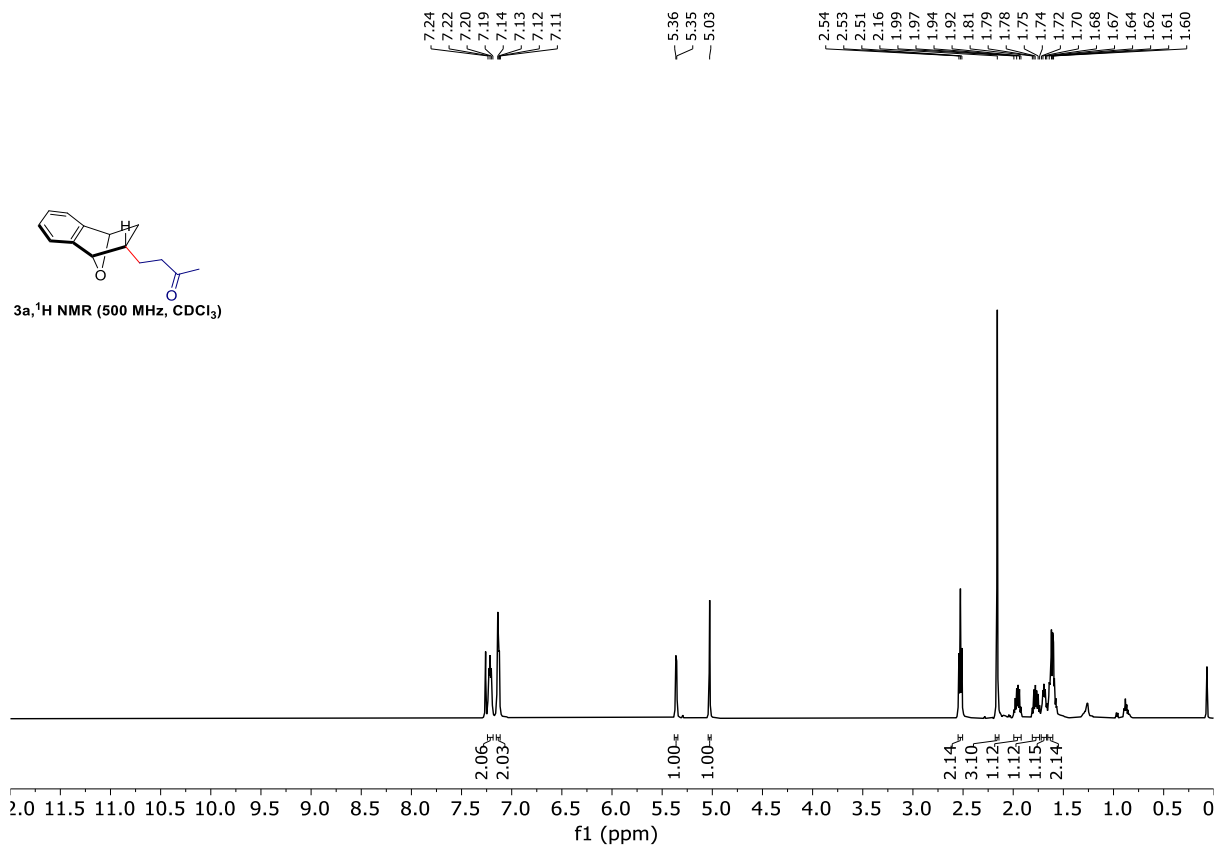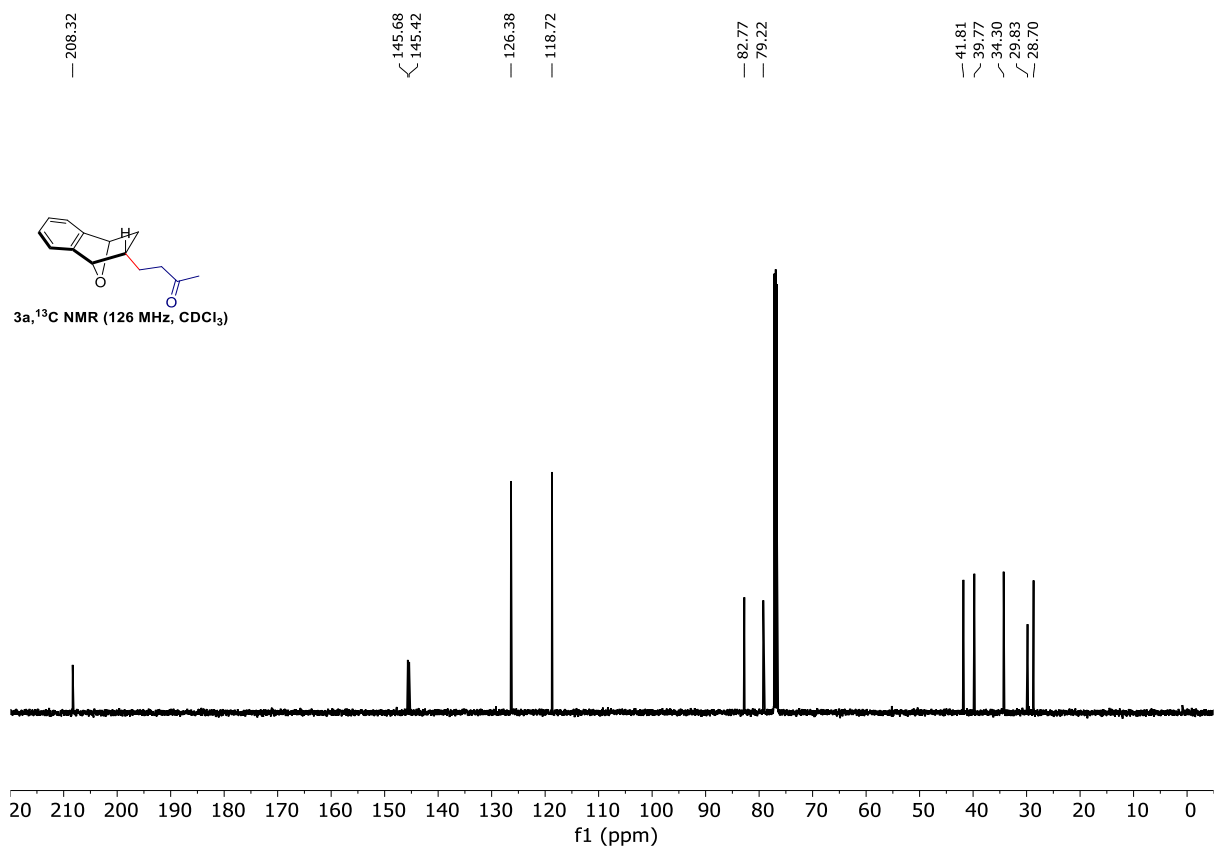

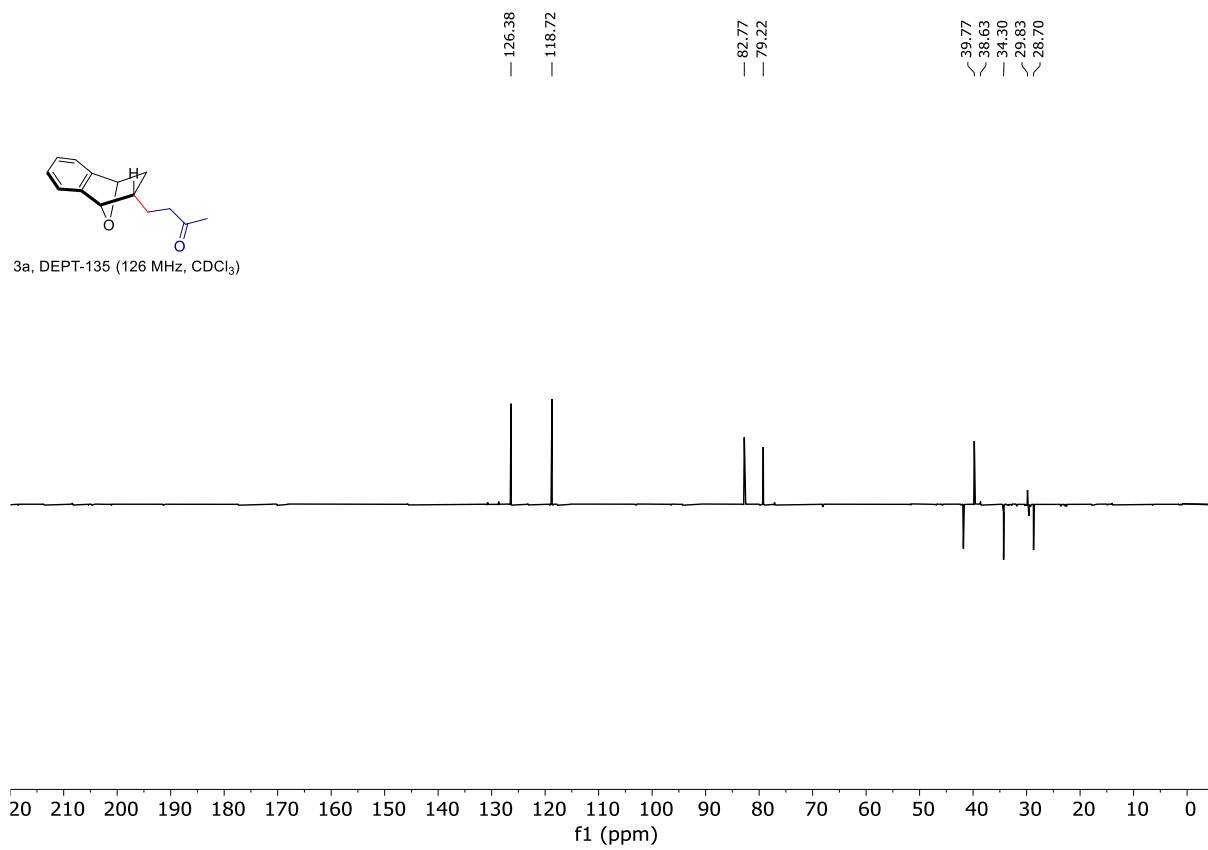

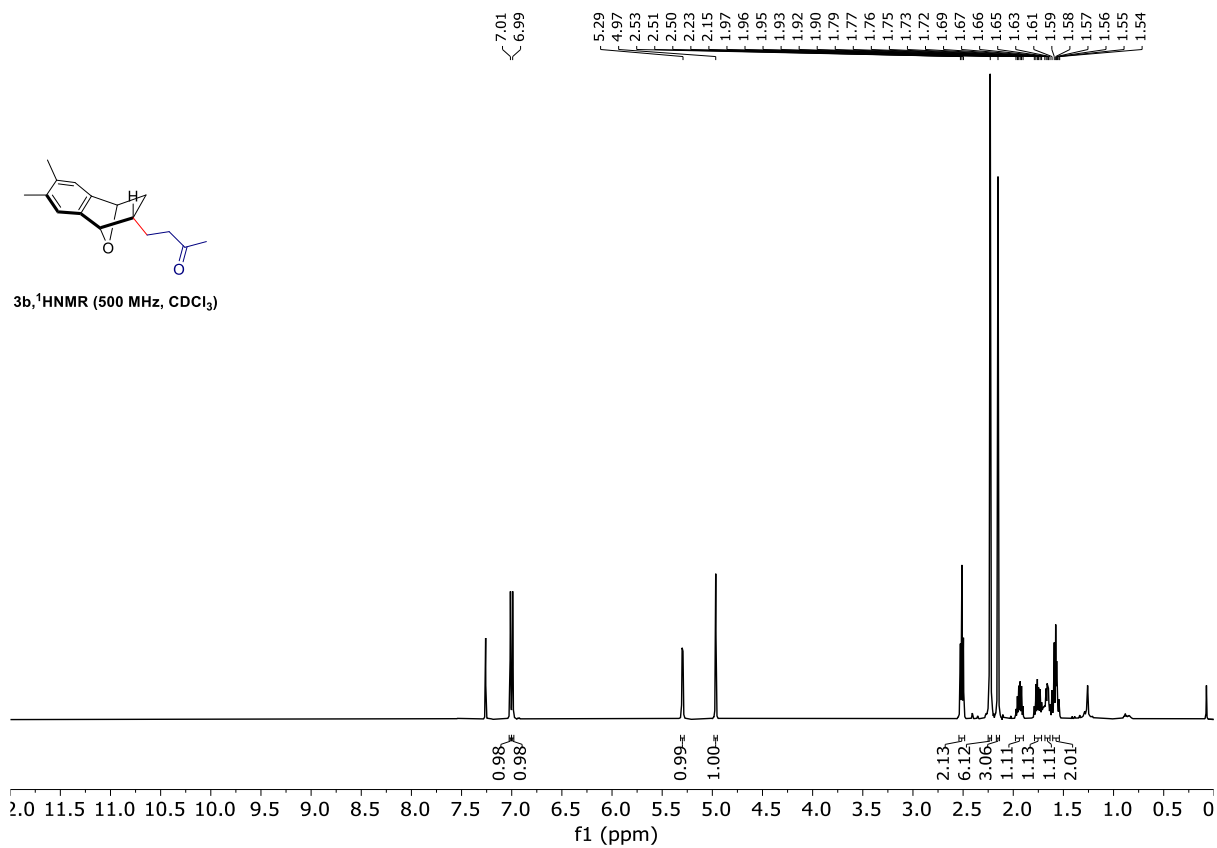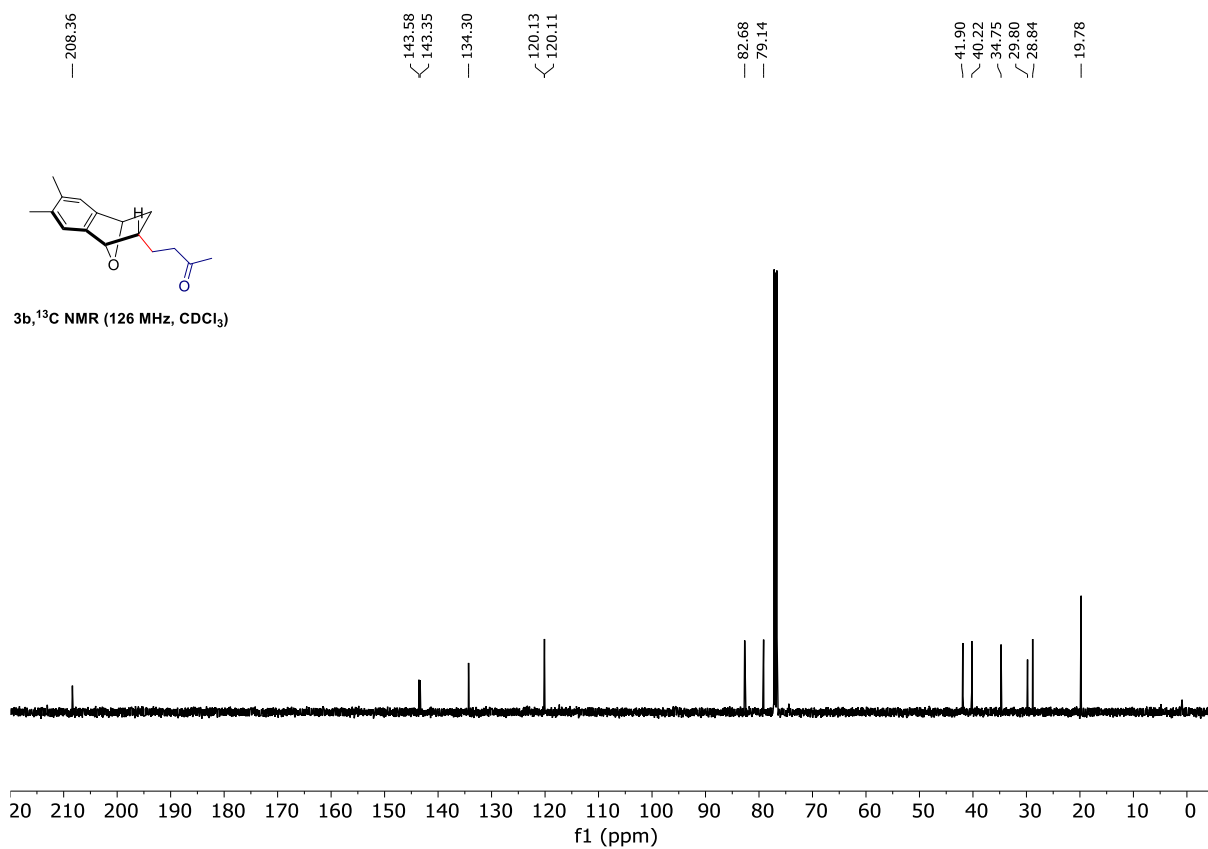

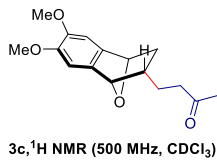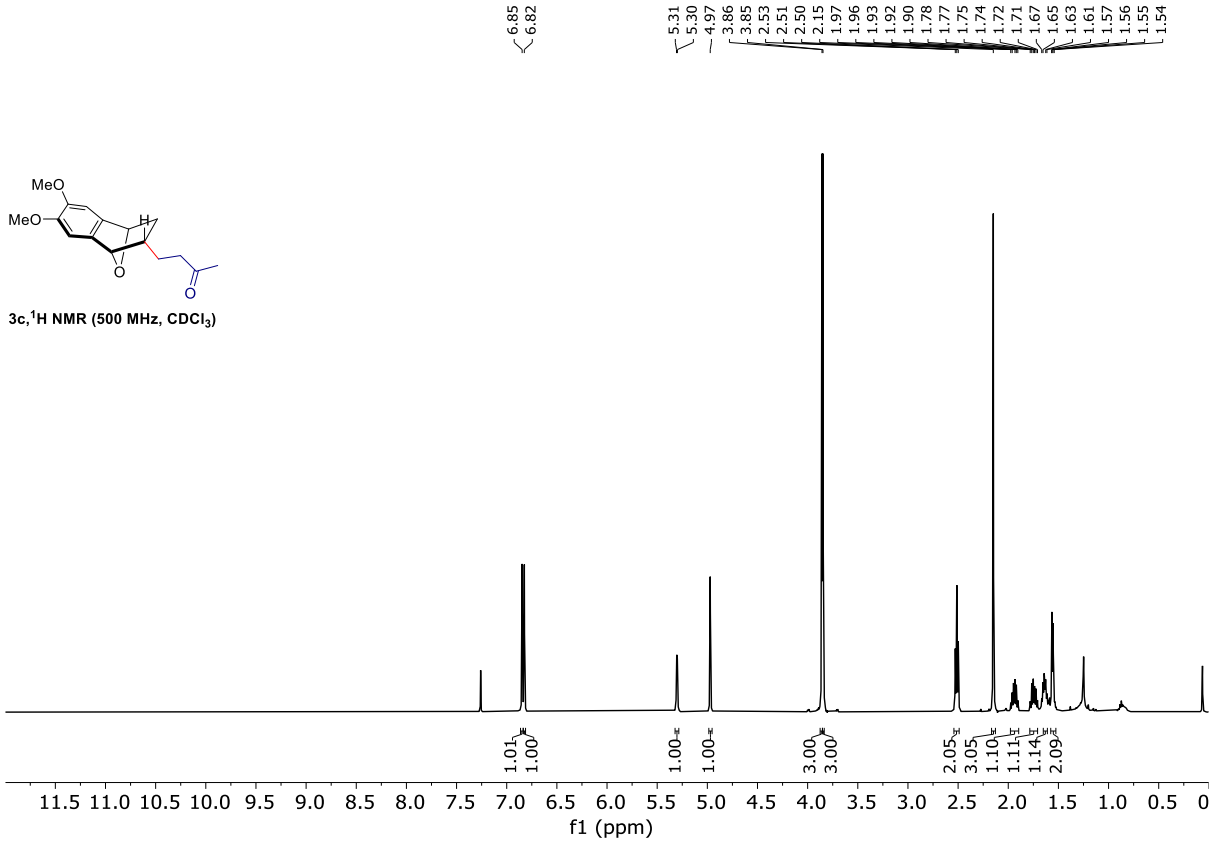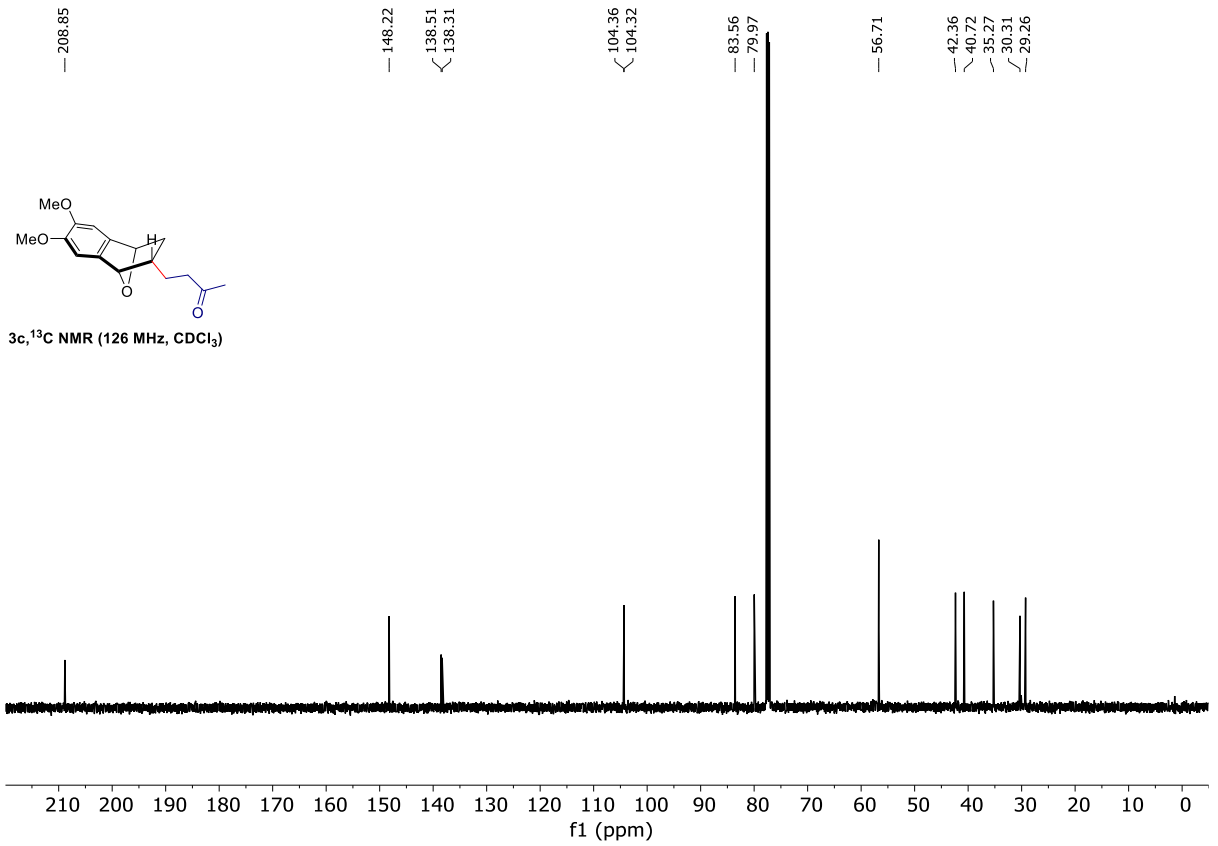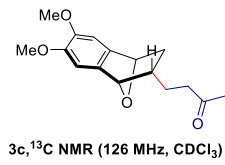

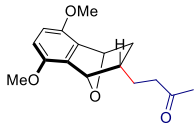

3d, <sup>1</sup>H NMR (500 MHz, CDCl<sub>3</sub>)

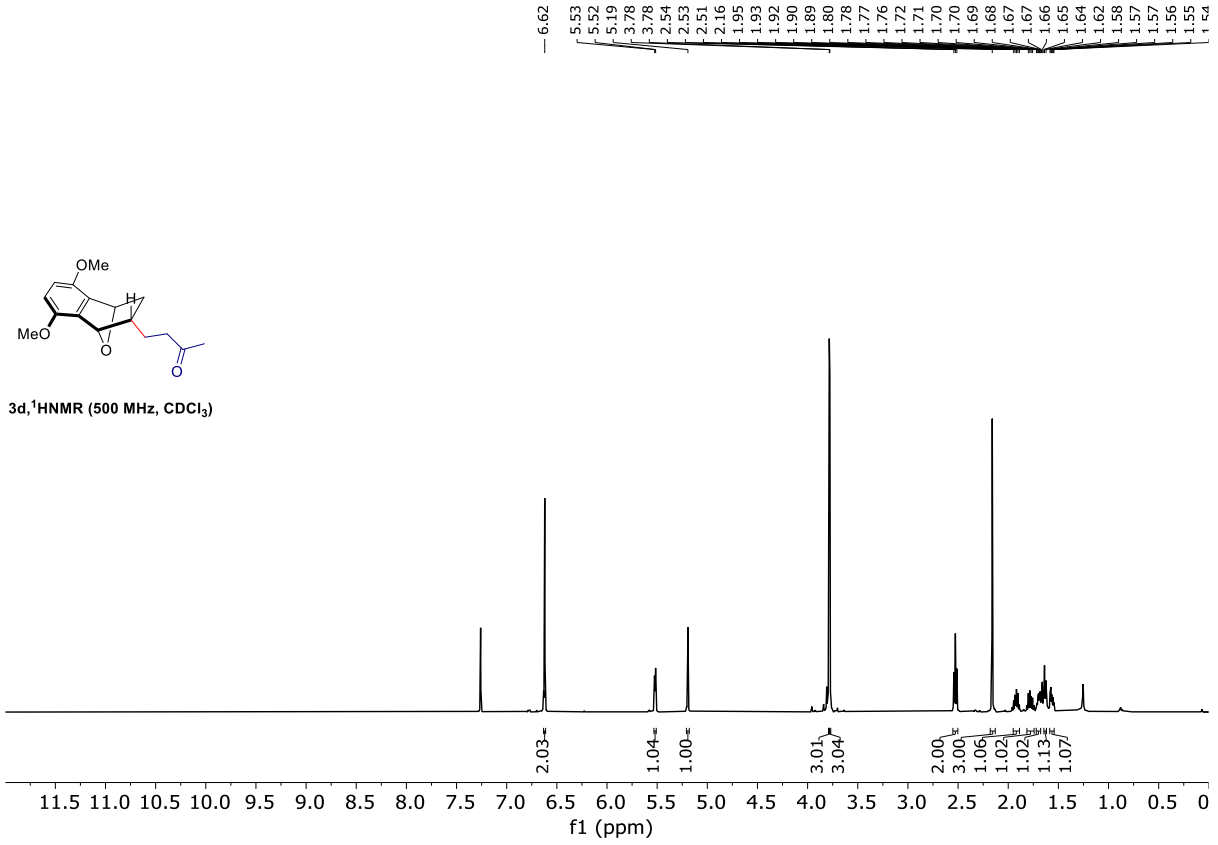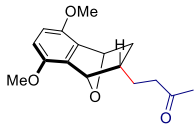

3d, <sup>13</sup>C NMR (126 MHz, CDCl<sub>3</sub>)

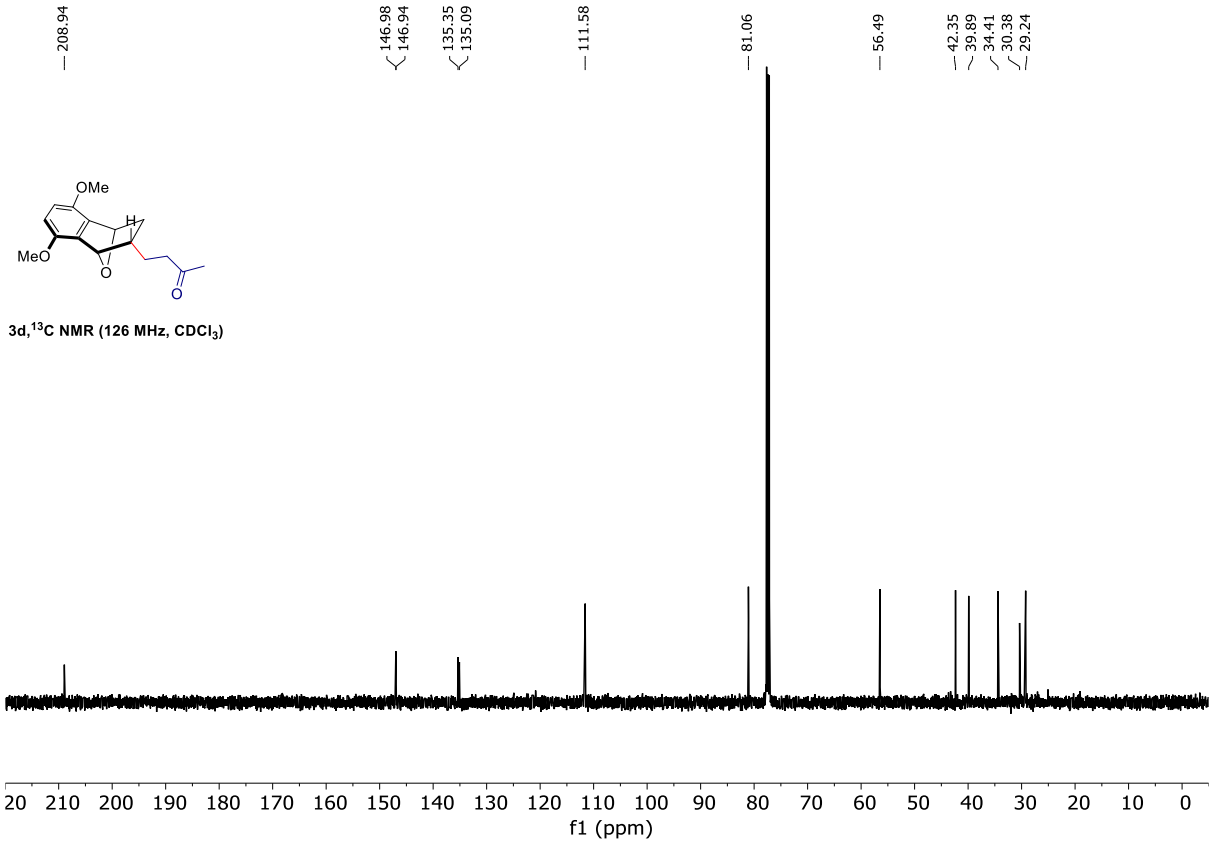



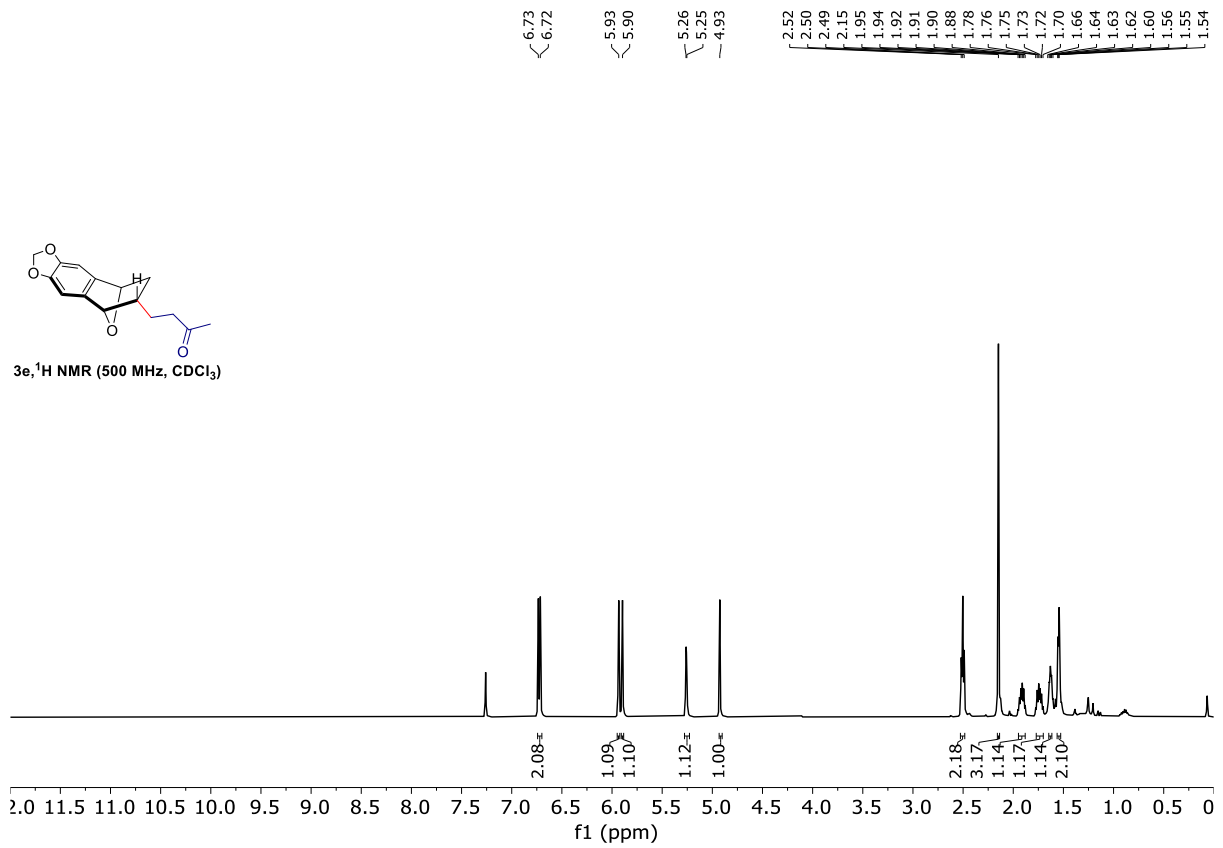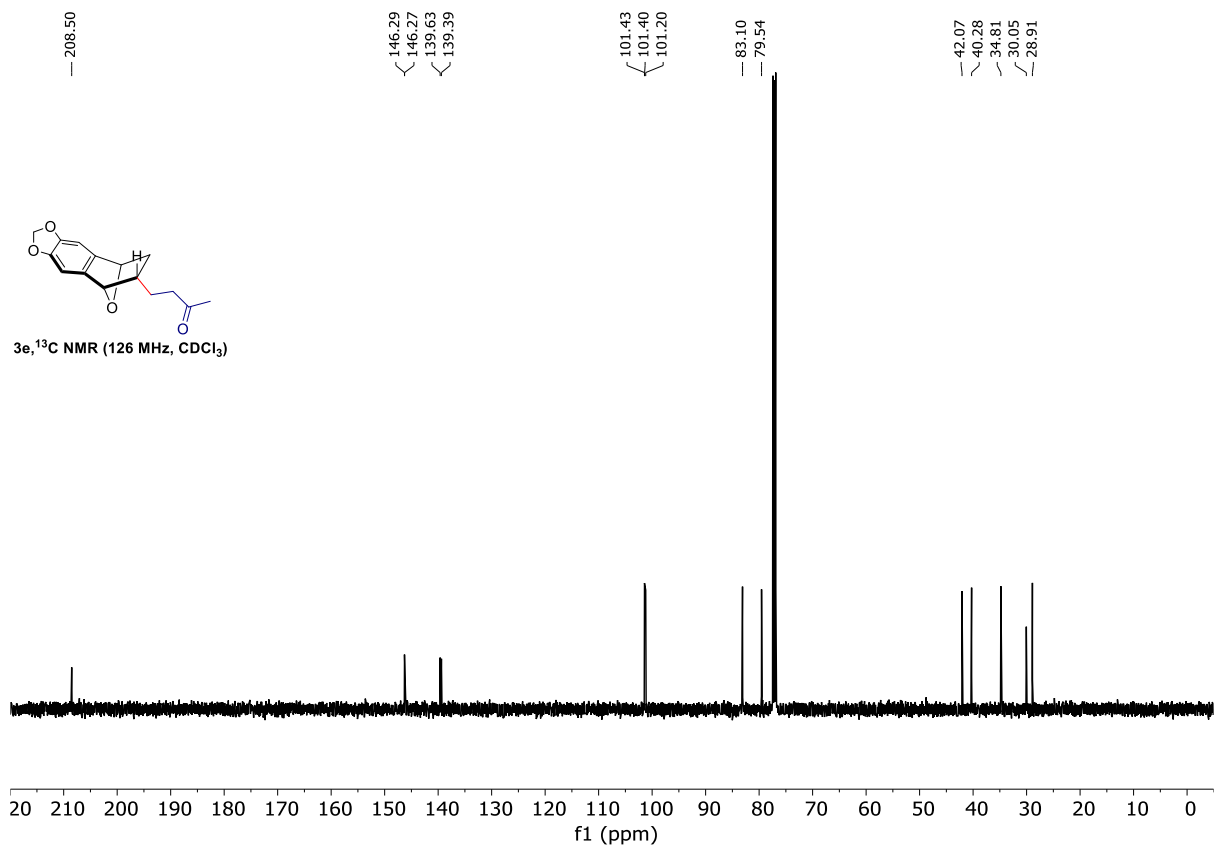

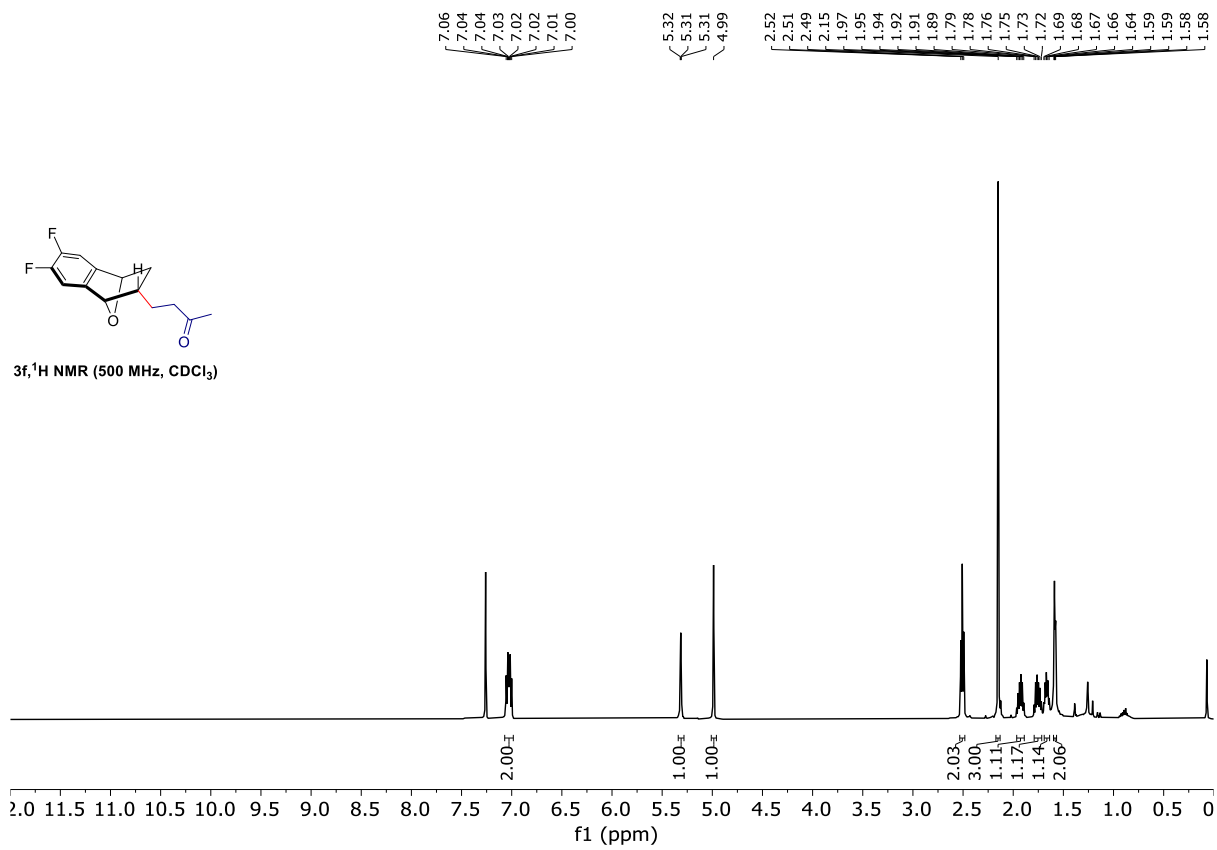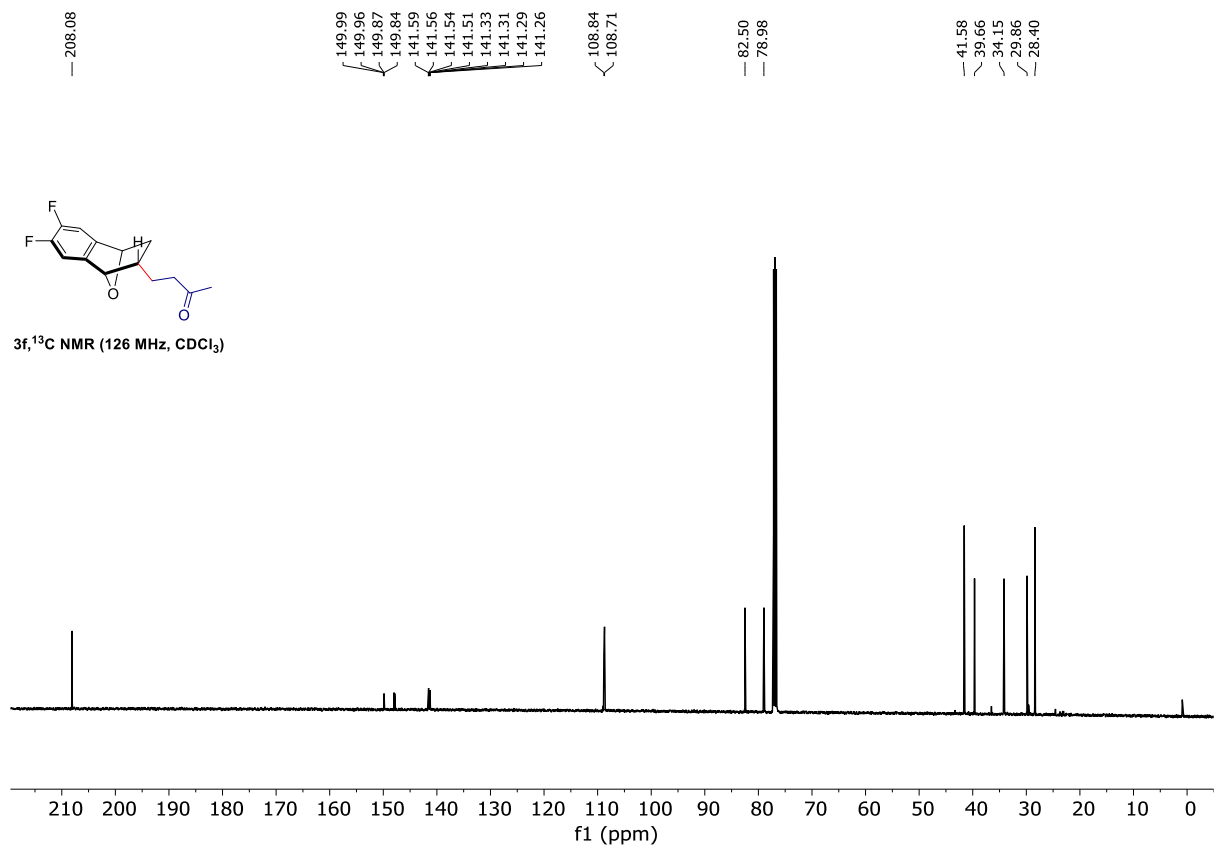

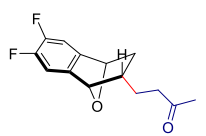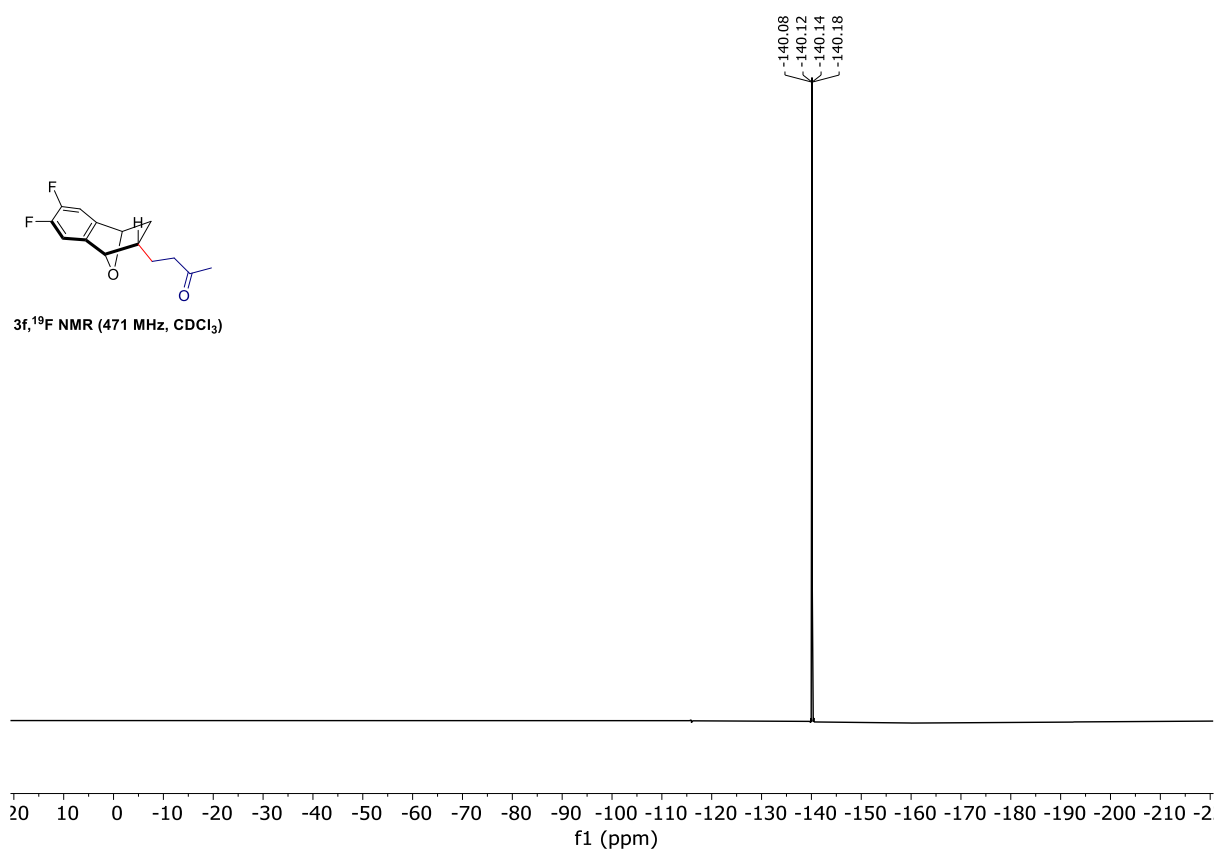

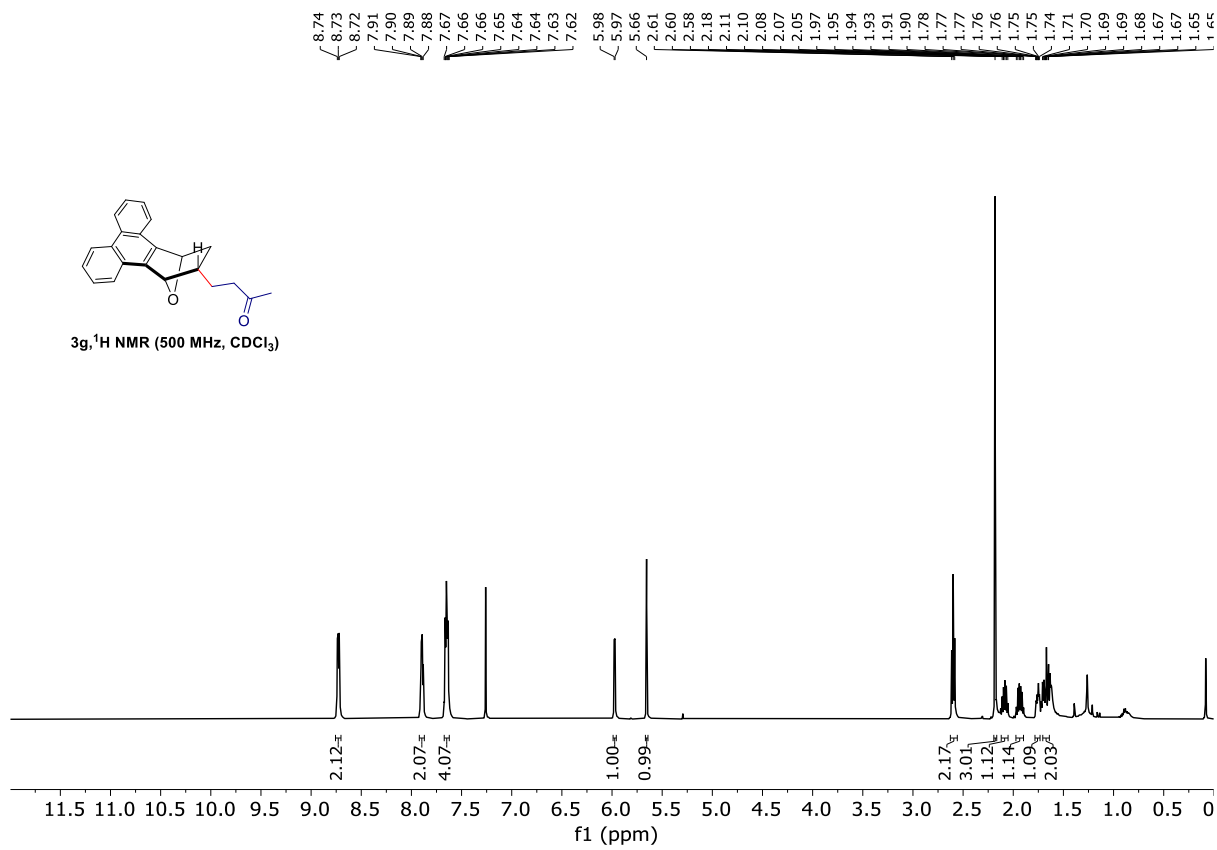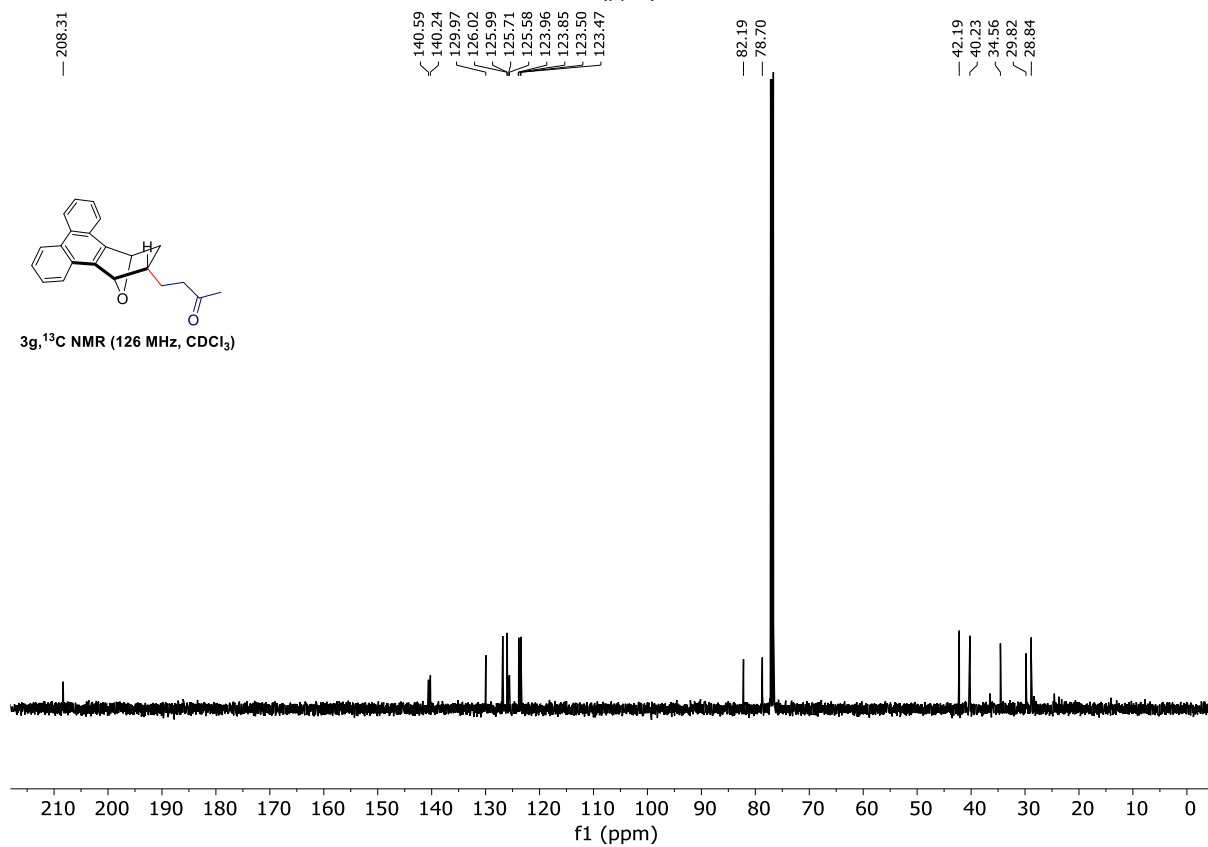

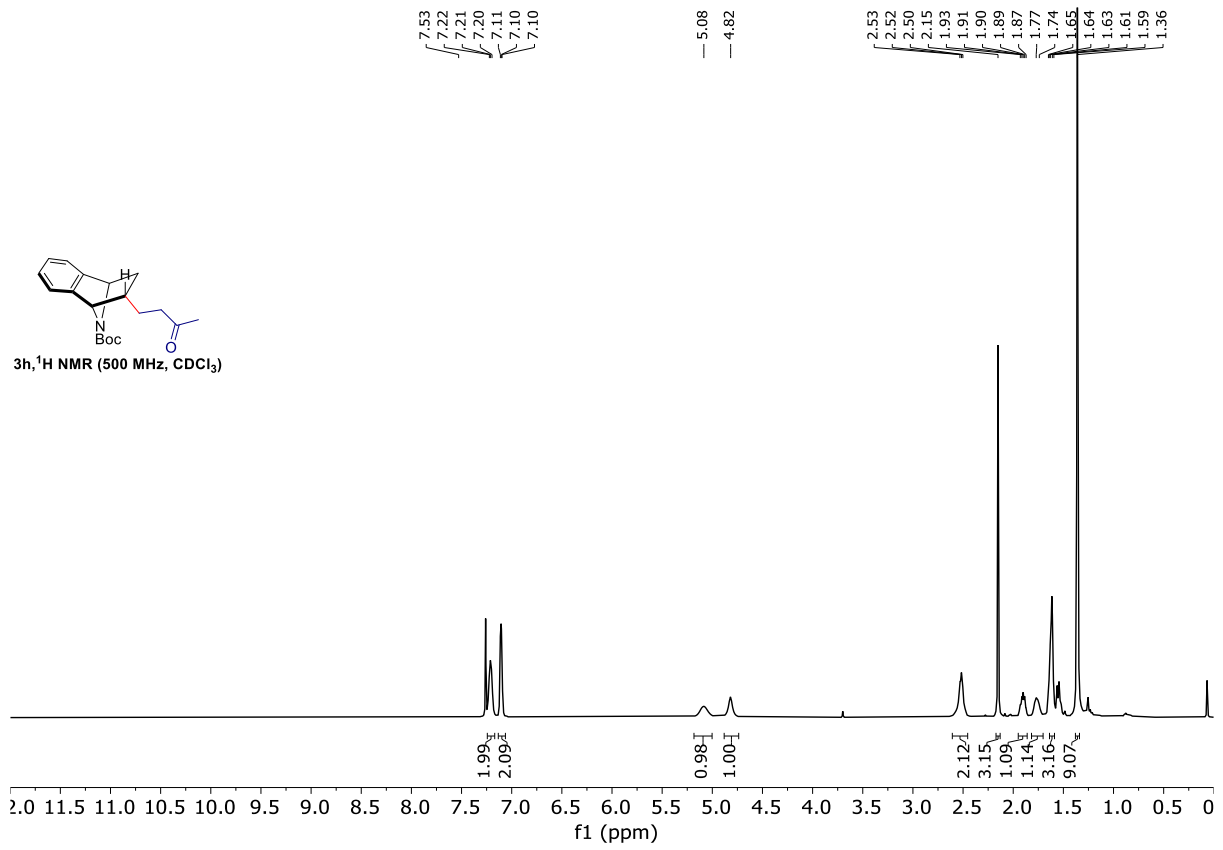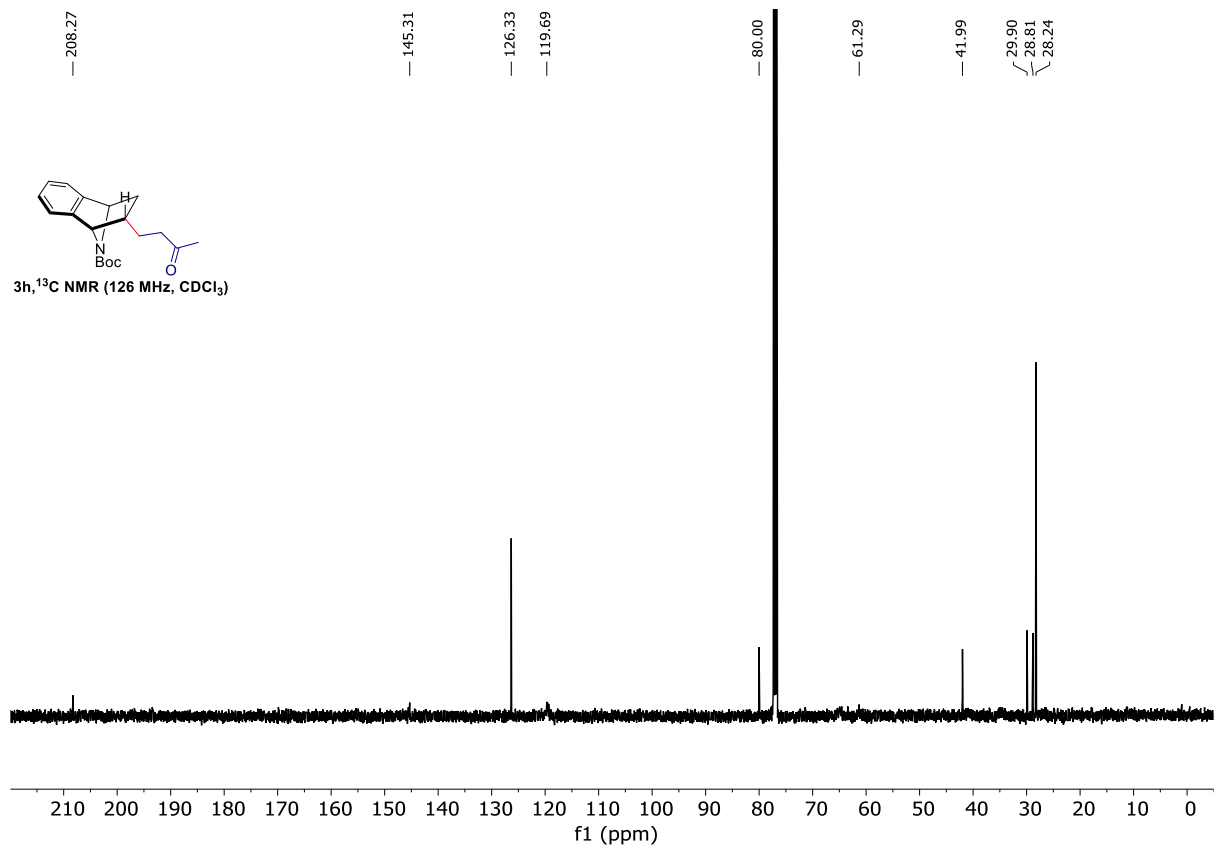

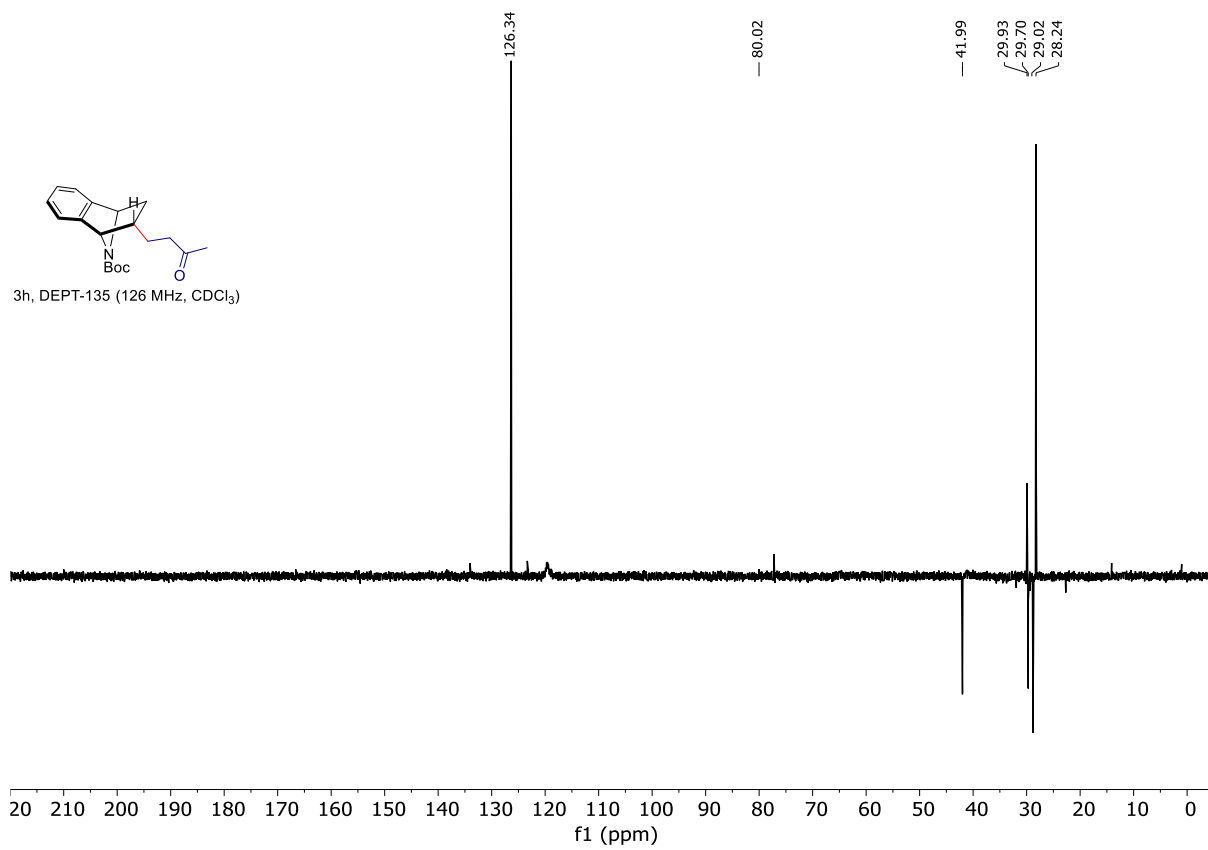

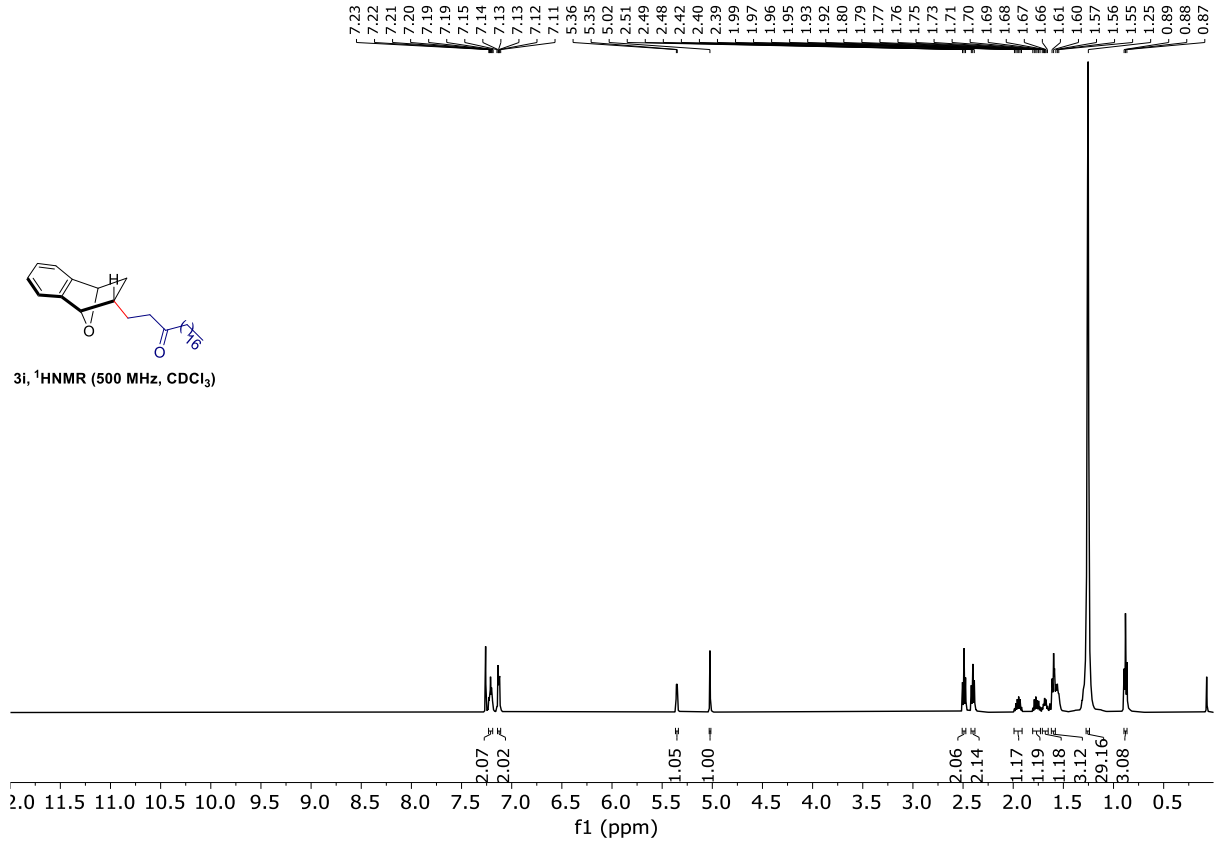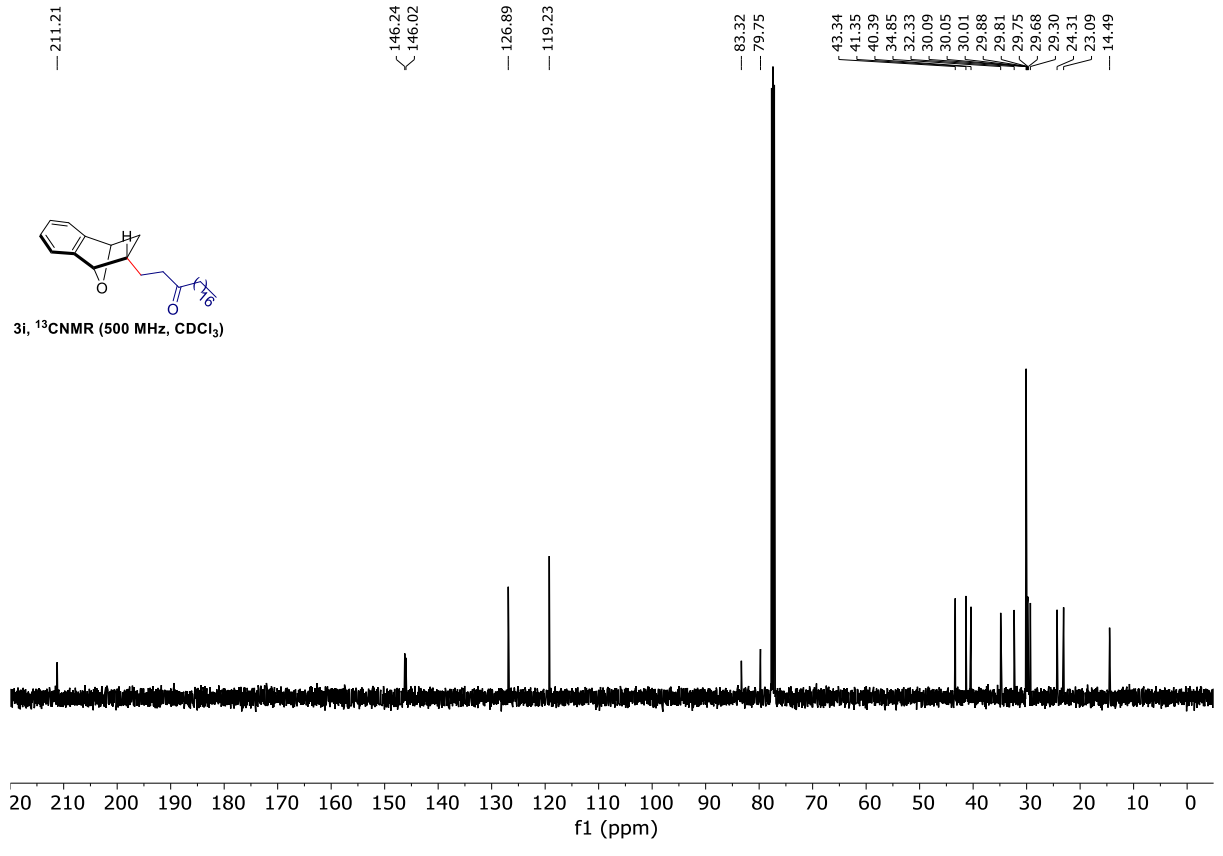

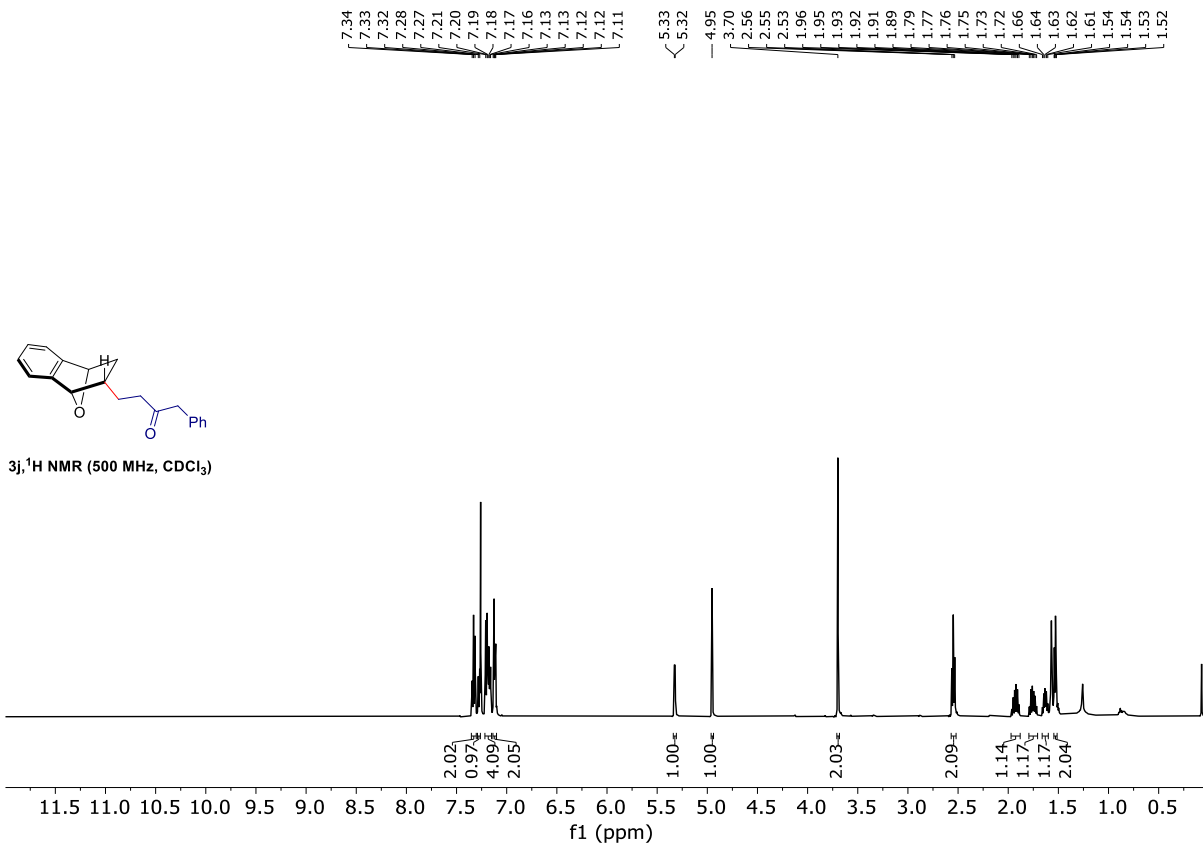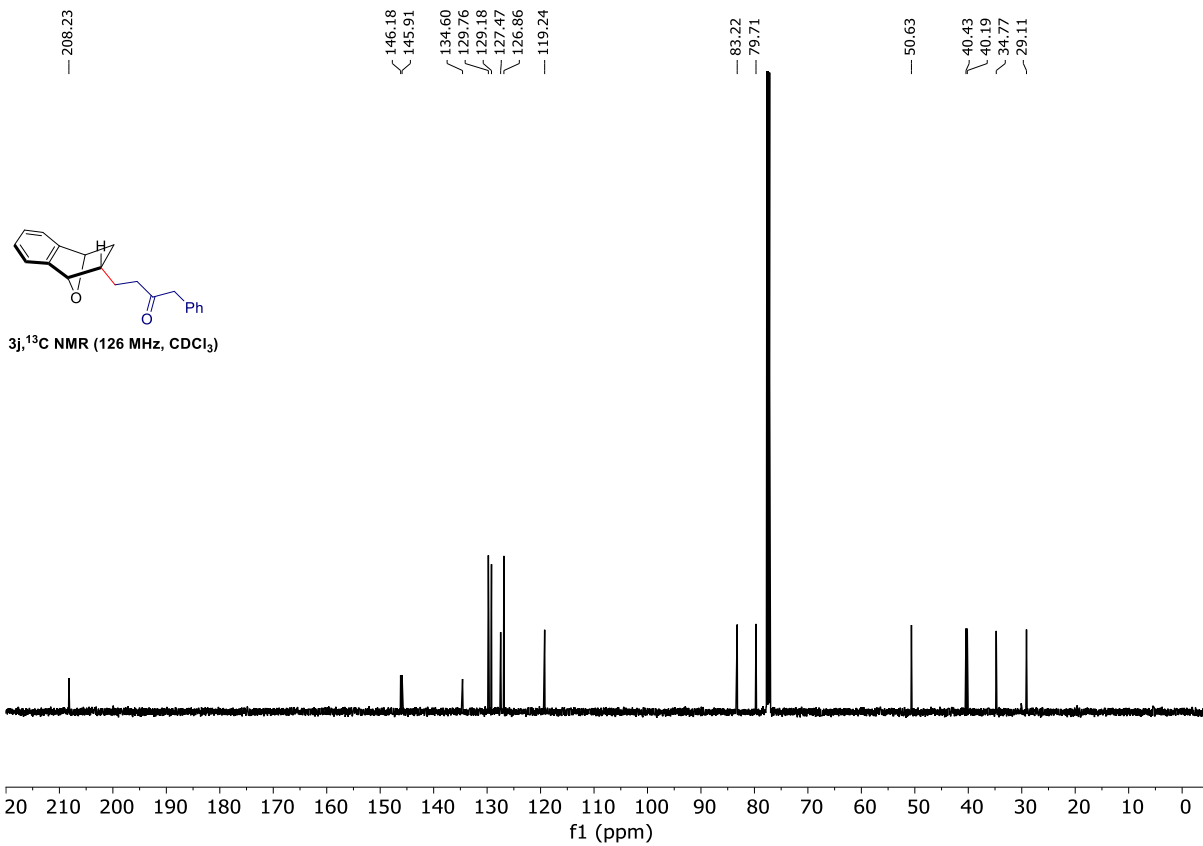



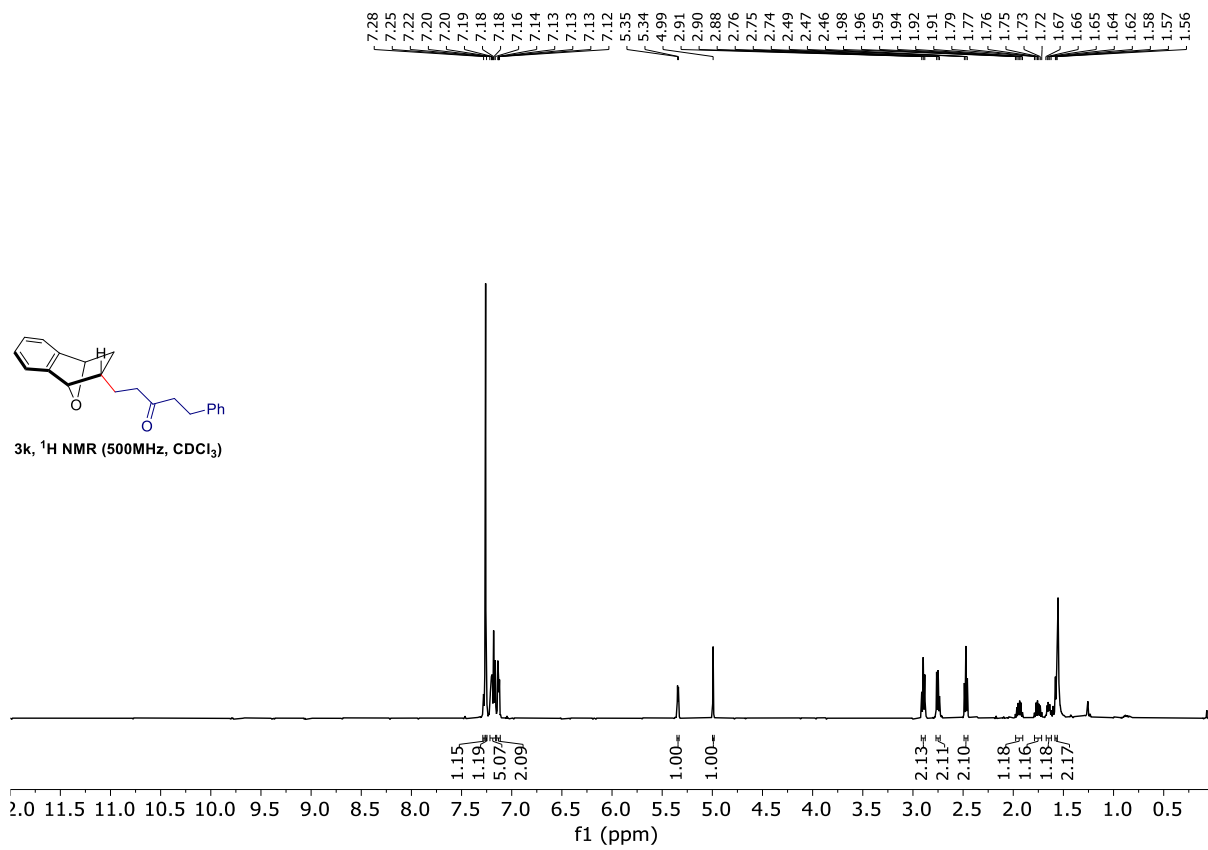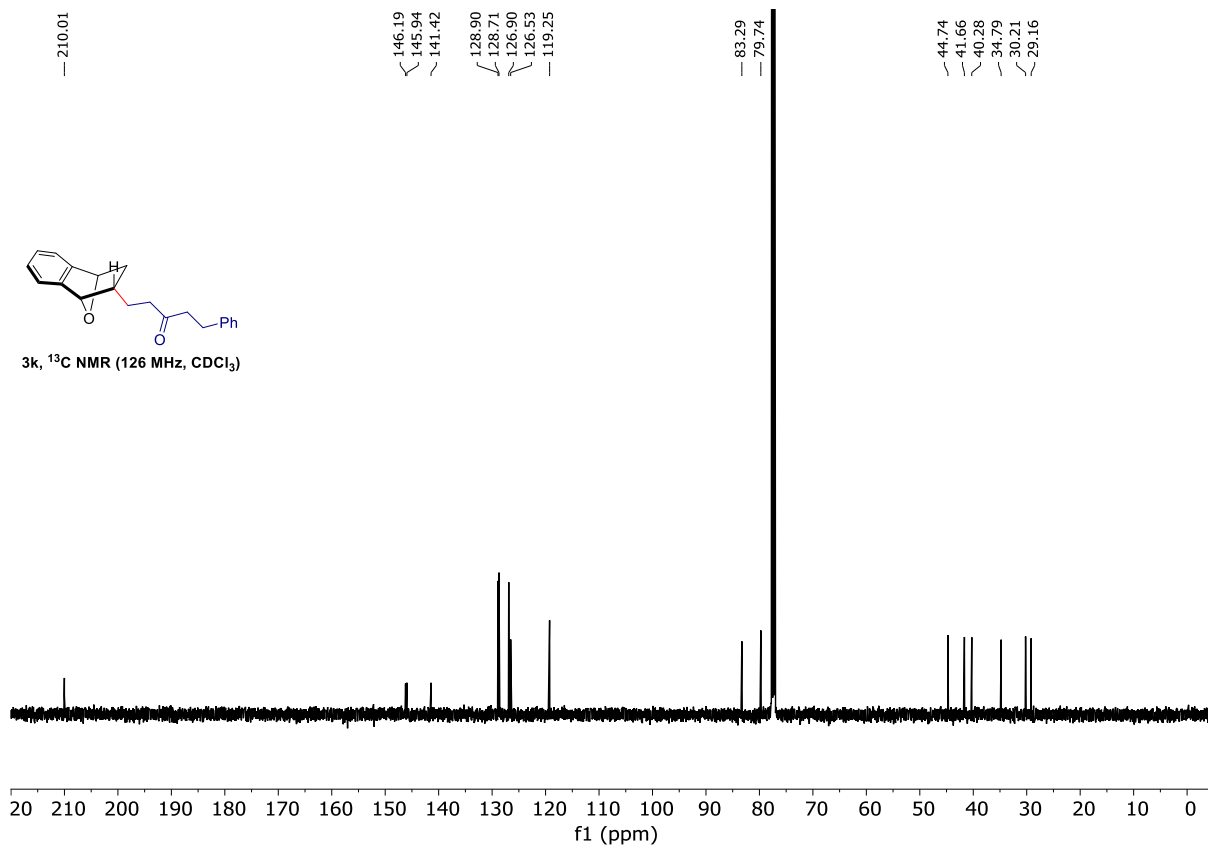

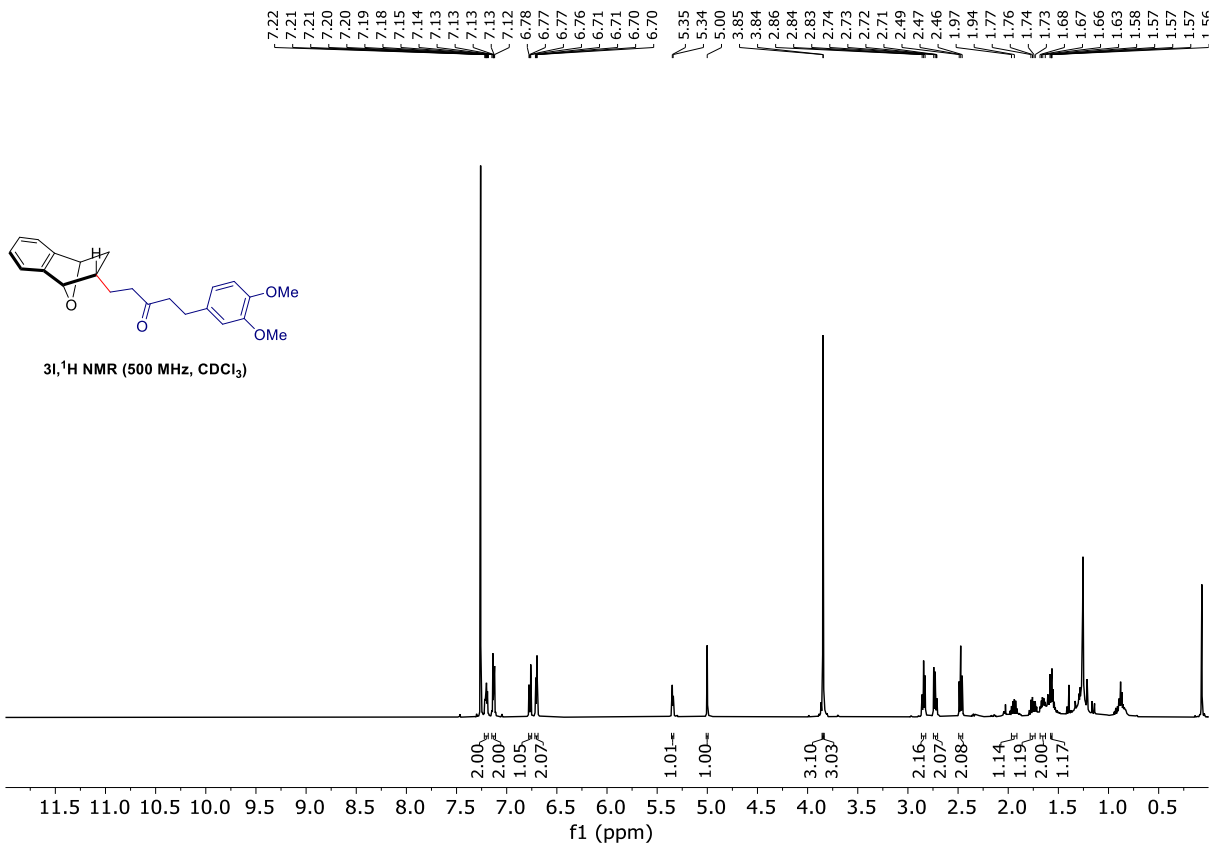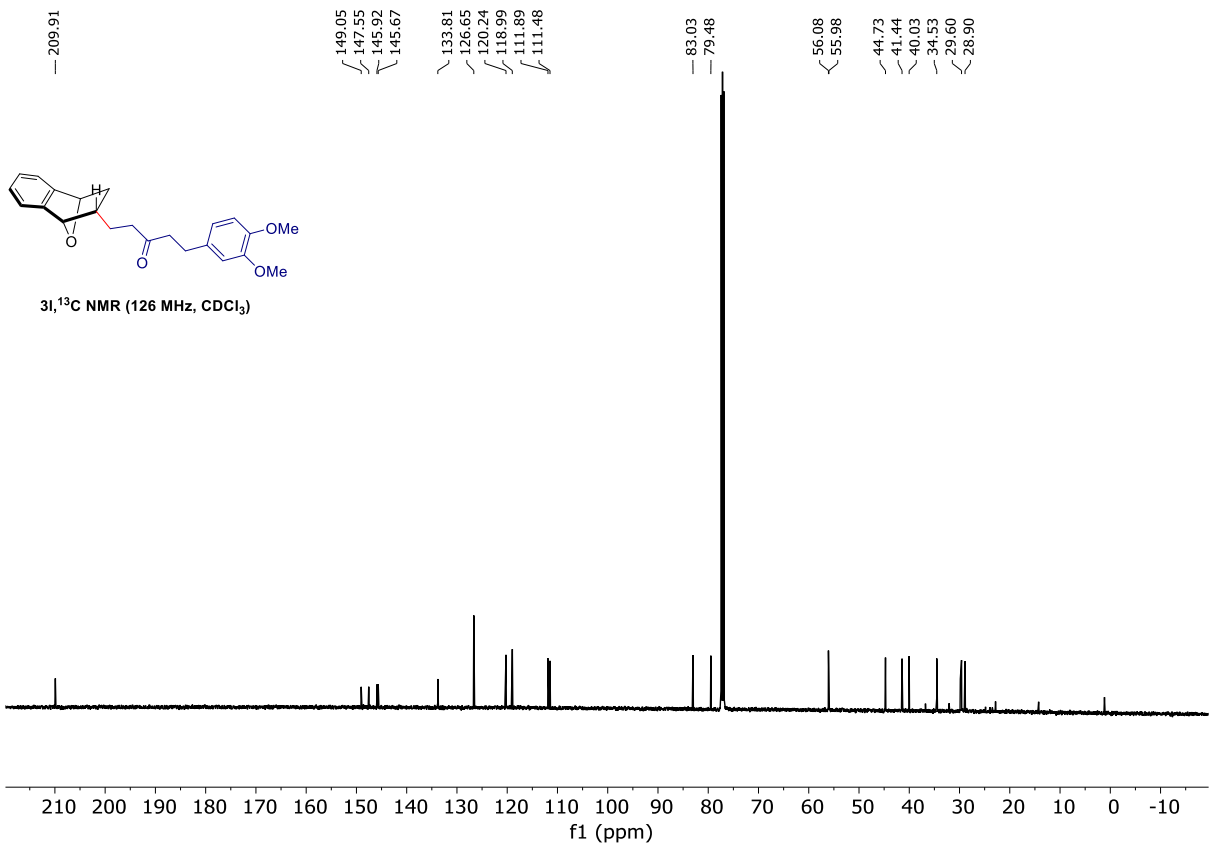

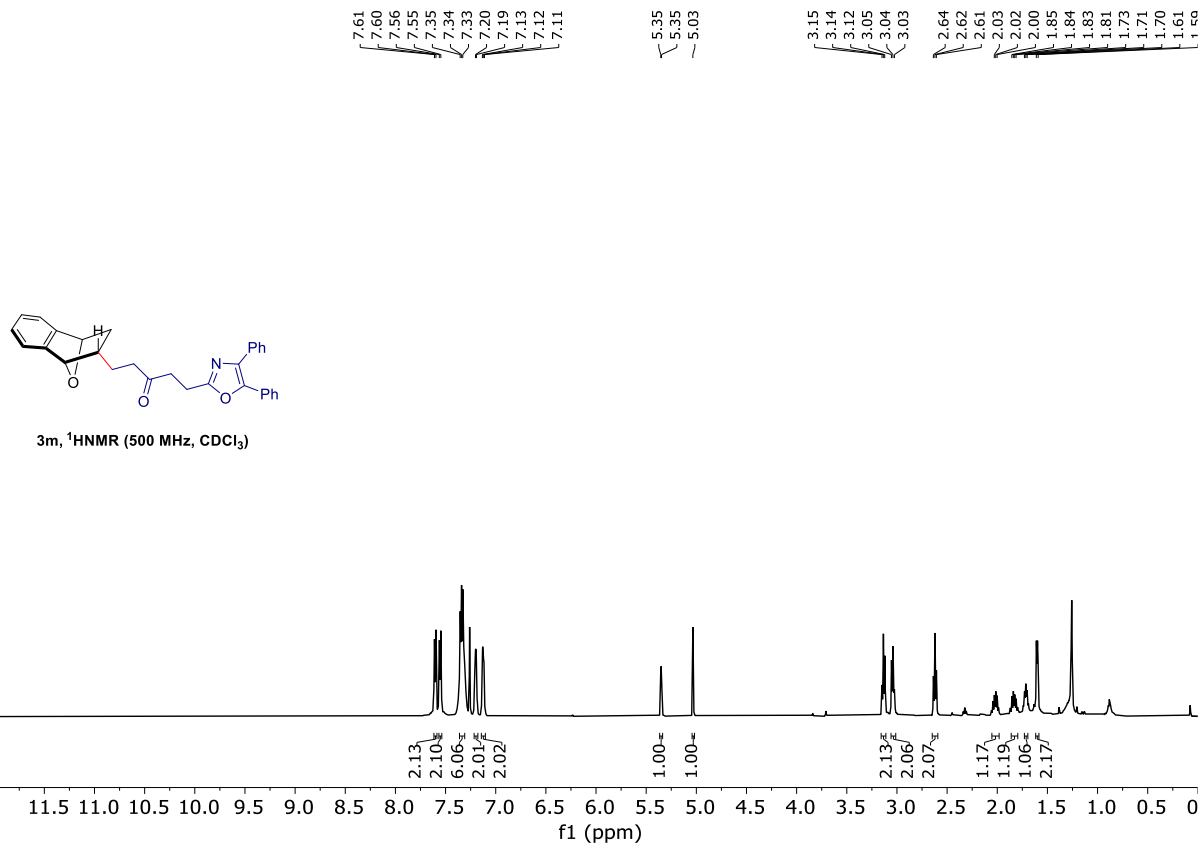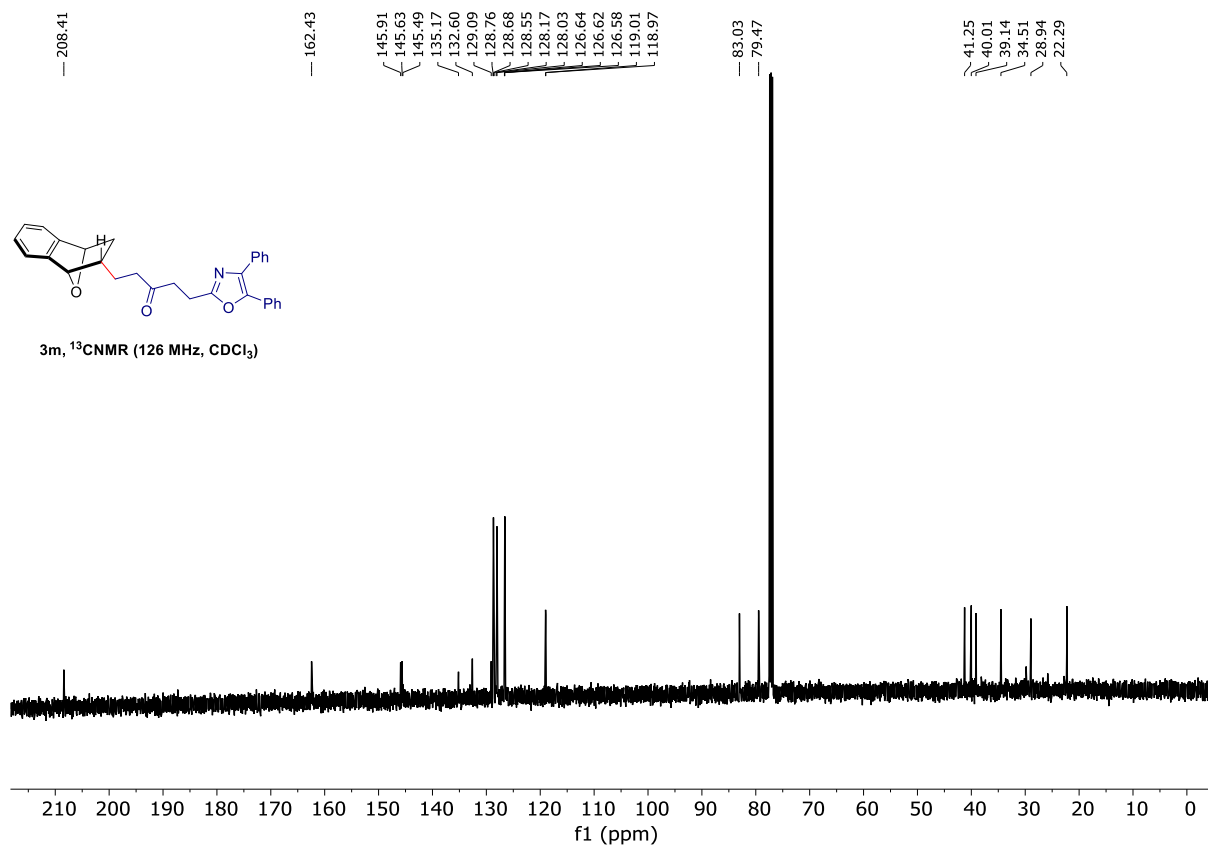

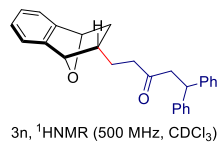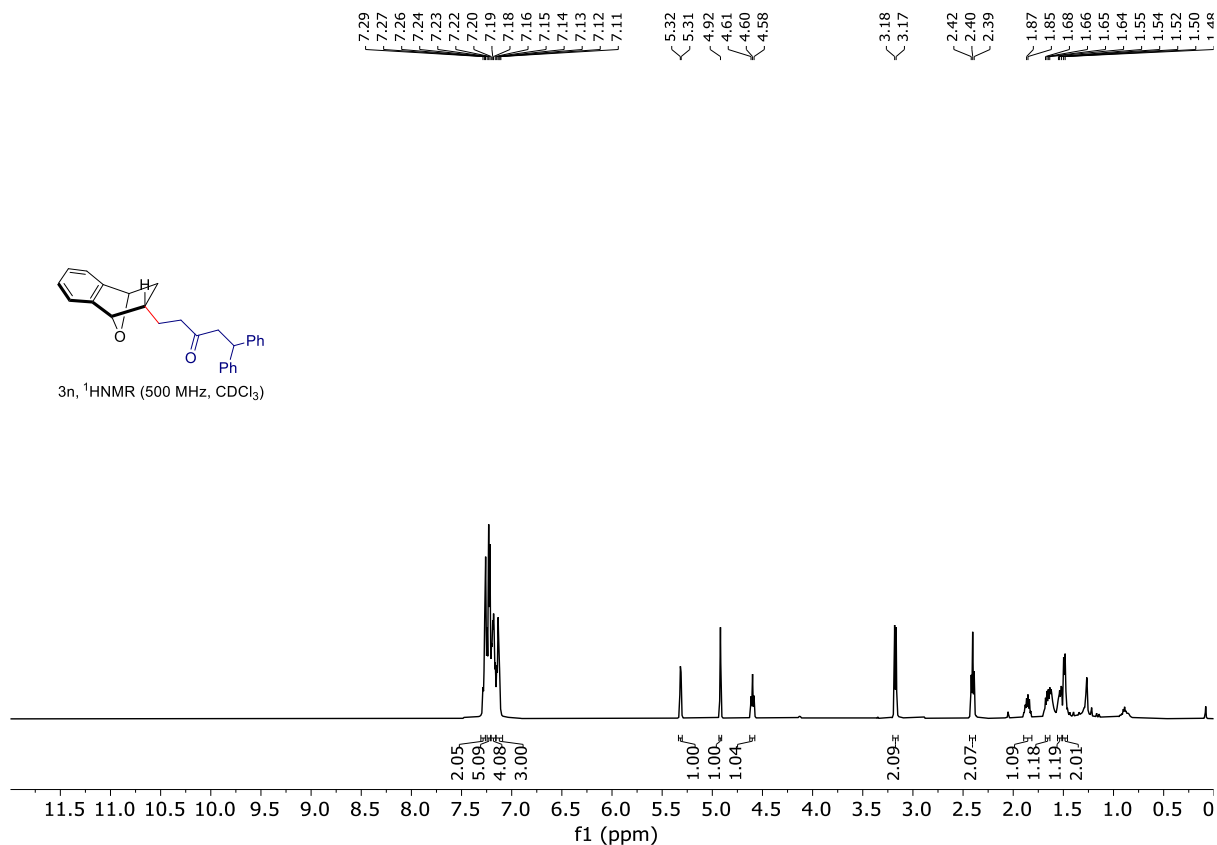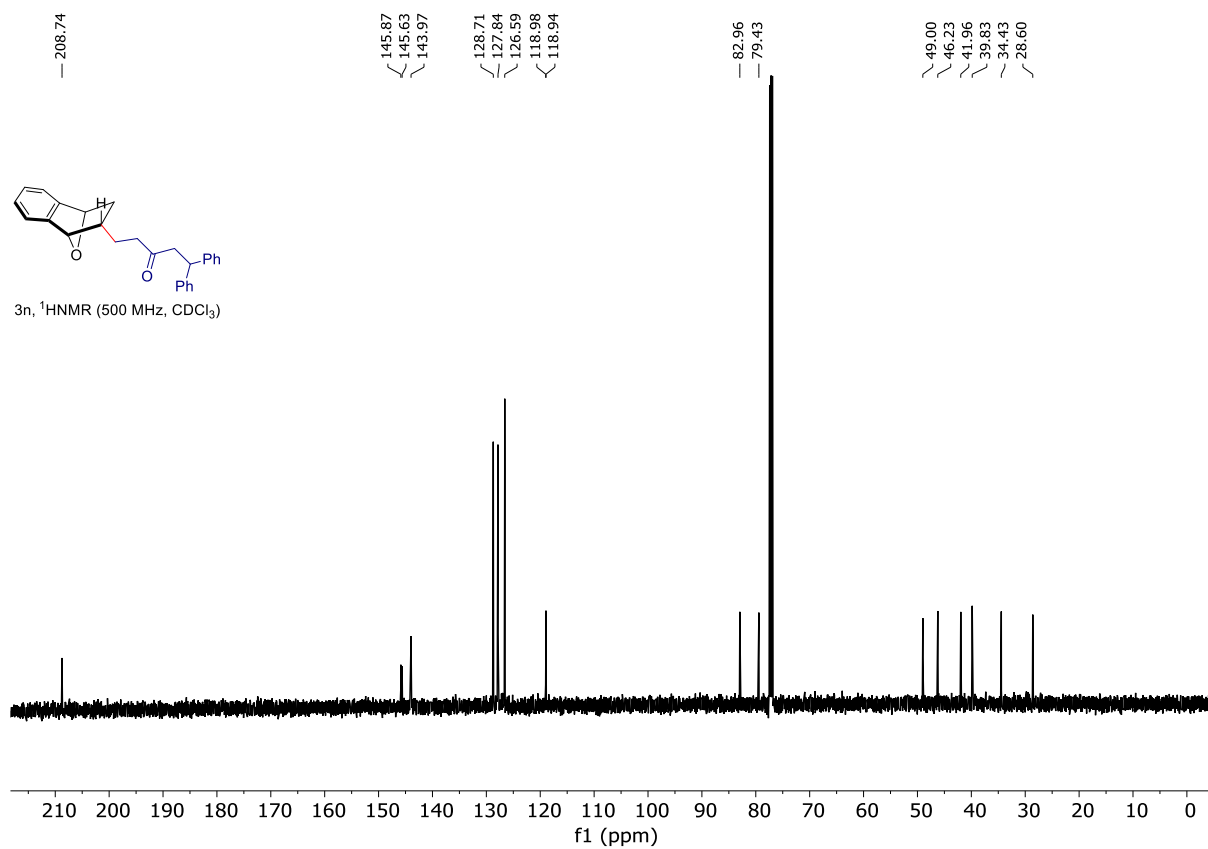

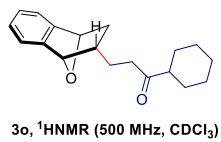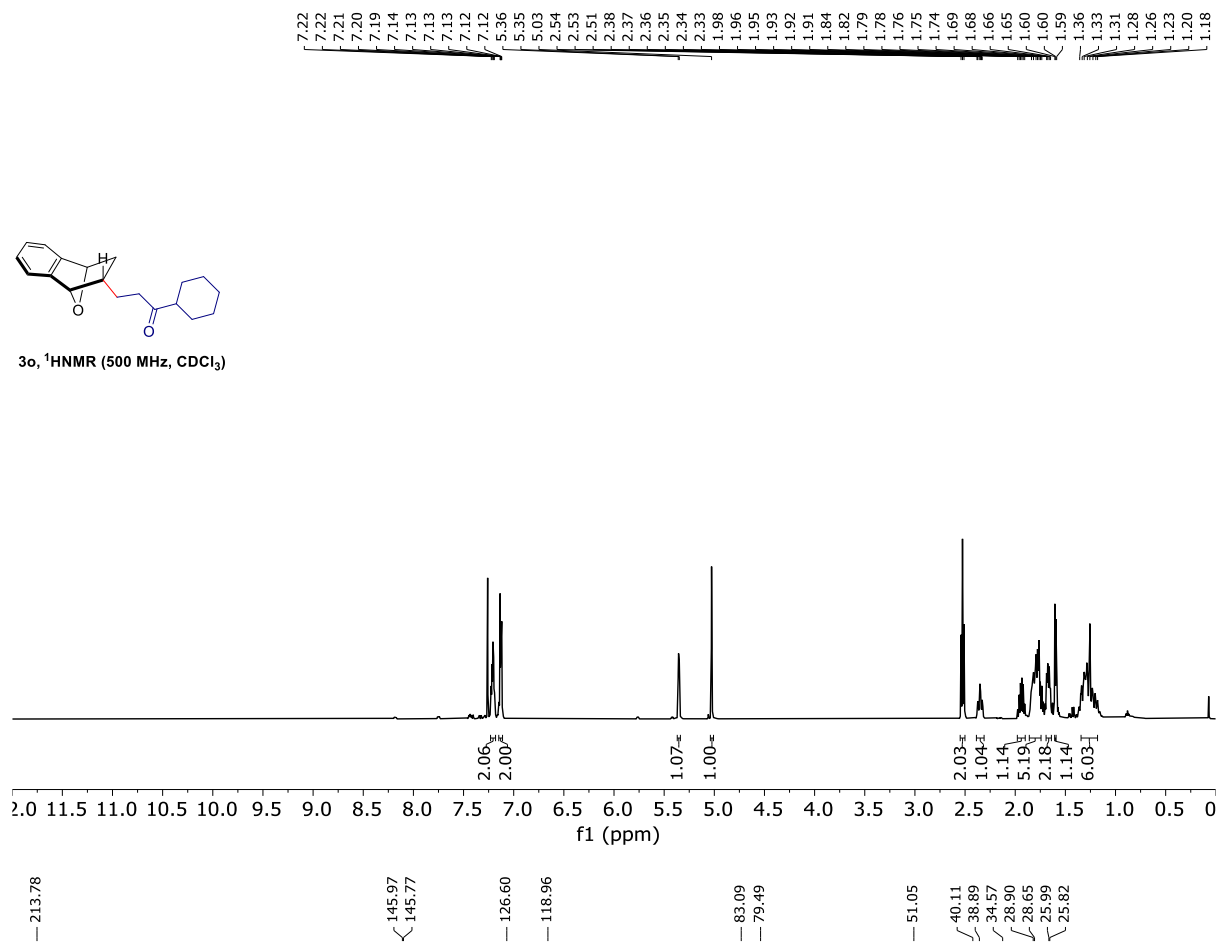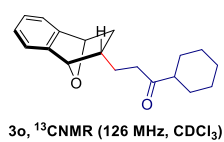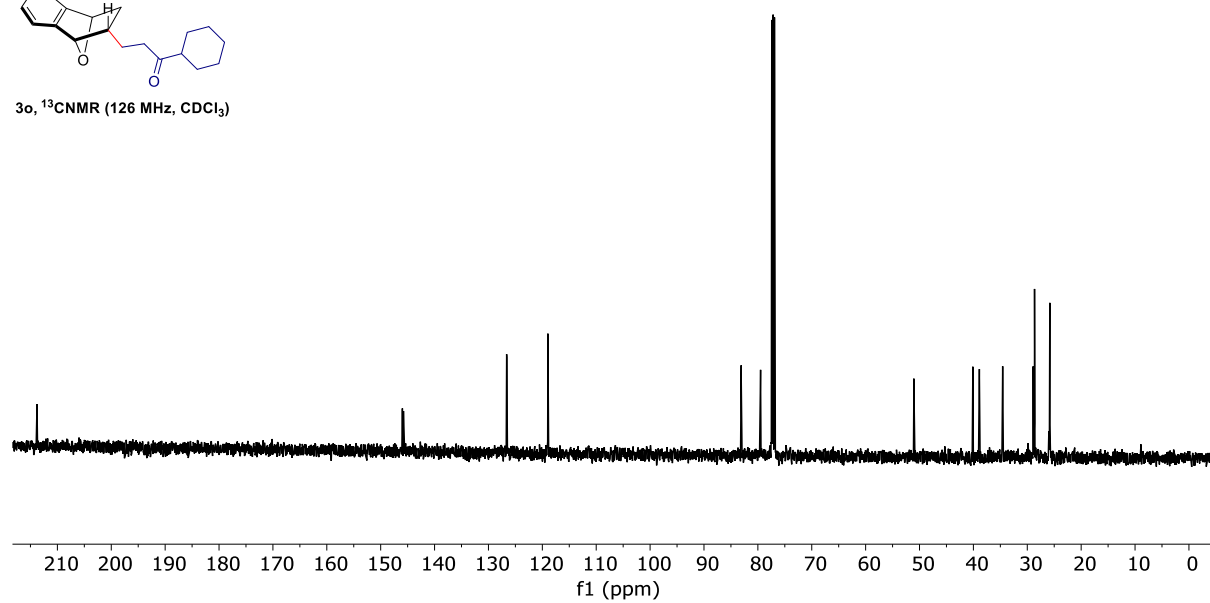

7.23  
7.21  
7.20  
7.14  
7.13  
7.13  
7.12  
5.85  
5.83  
5.82  
5.79  
5.76  
5.36  
5.35  
5.02  
5.01  
5.01  
5.00  
4.98  
4.97  
4.94  
4.93  
4.93  
4.92  
4.91  
2.51  
2.49  
2.48  
2.42  
2.41  
2.39  
2.05  
2.04  
2.02  
2.01  
1.99  
1.97  
1.96  
1.95  
1.93  
1.92  
1.79  
1.77  
1.76  
1.74  
1.73  
1.71  
1.70  
1.68  
1.67  
1.66  
1.61  
1.60  
1.57  
1.56  
1.54  
1.39  
1.38  
1.37  
1.35  
1.29  
1.28  
1.27

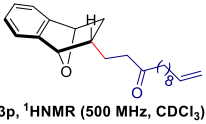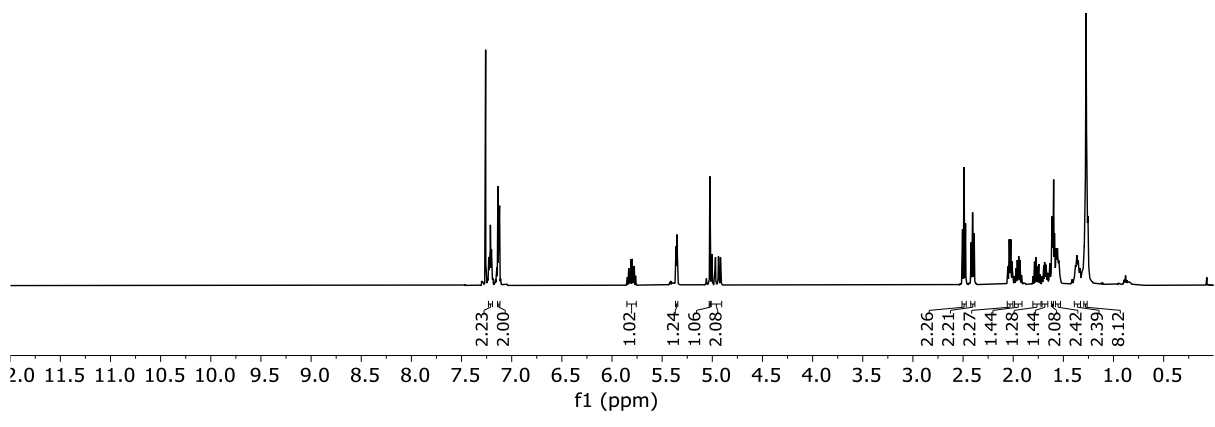

211.21  
146.21  
145.99  
139.56  
126.88  
119.22  
114.53  
83.31  
79.81  
43.30  
41.34  
40.36  
34.82  
34.15  
29.72  
29.68  
29.62  
29.44  
29.28  
24.26

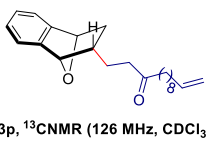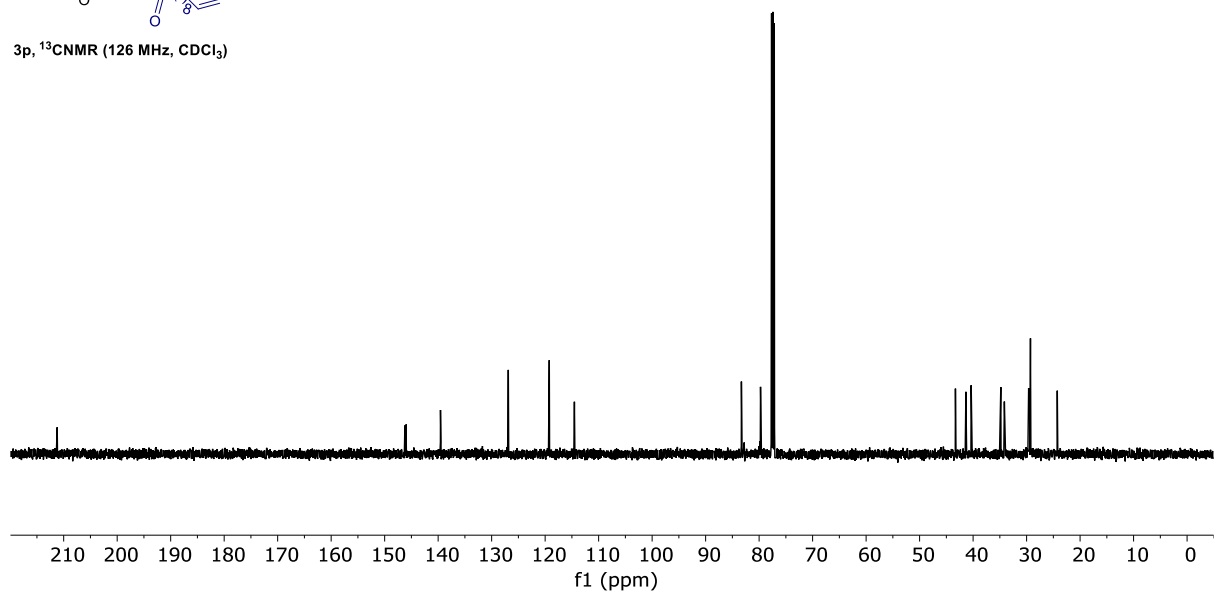

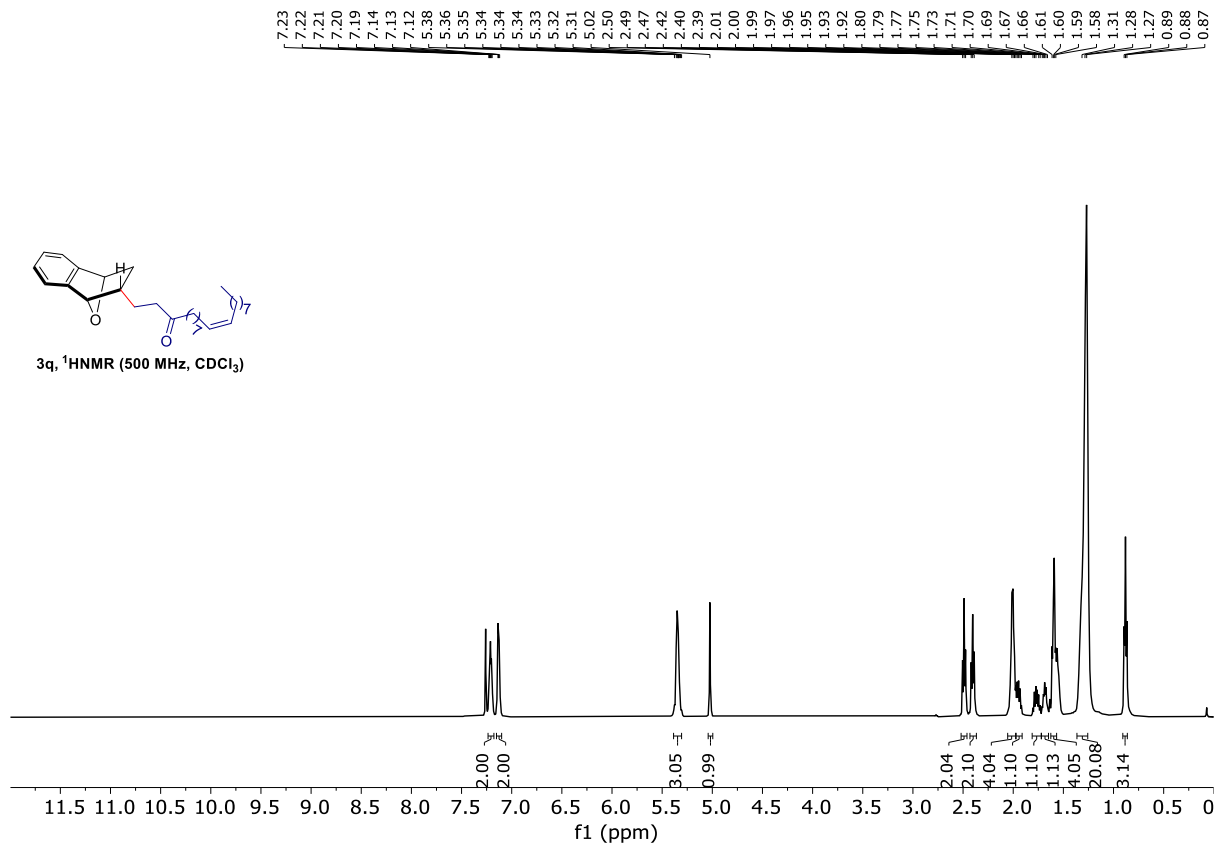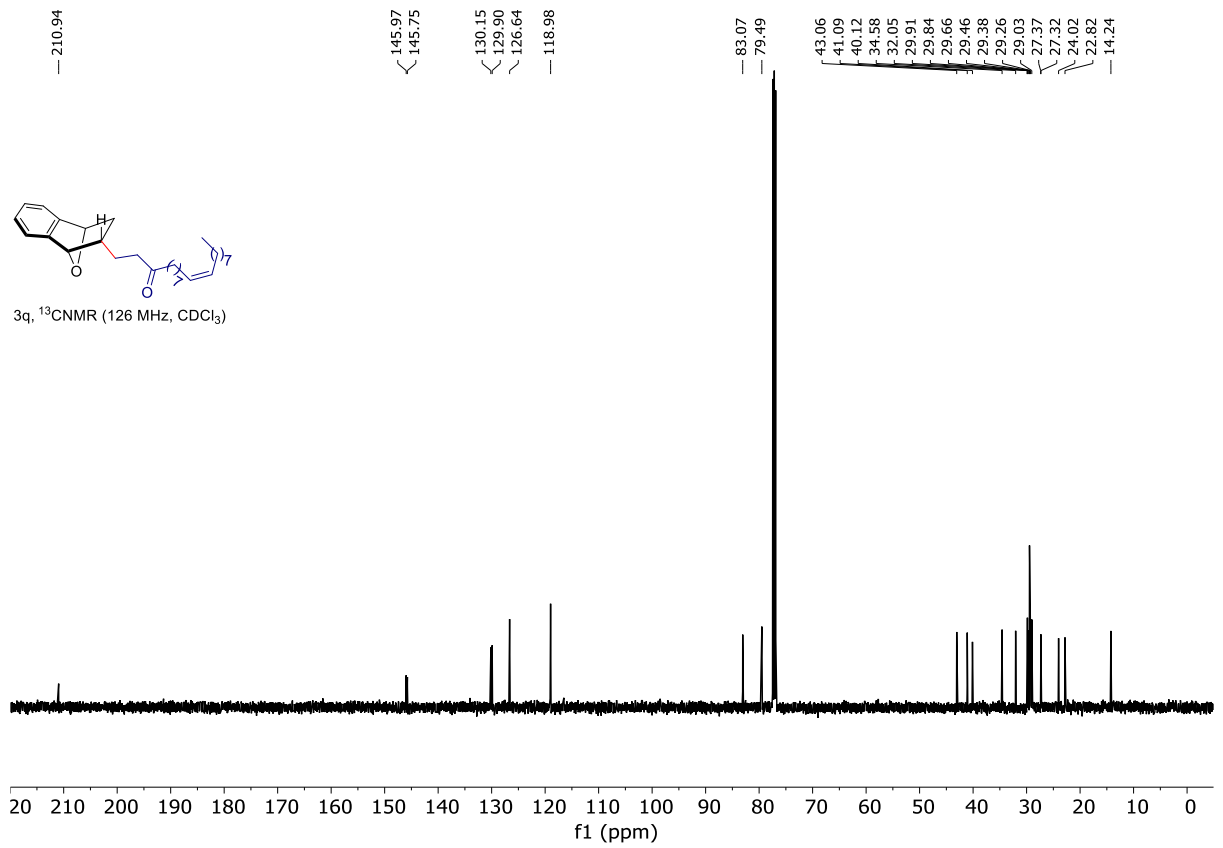

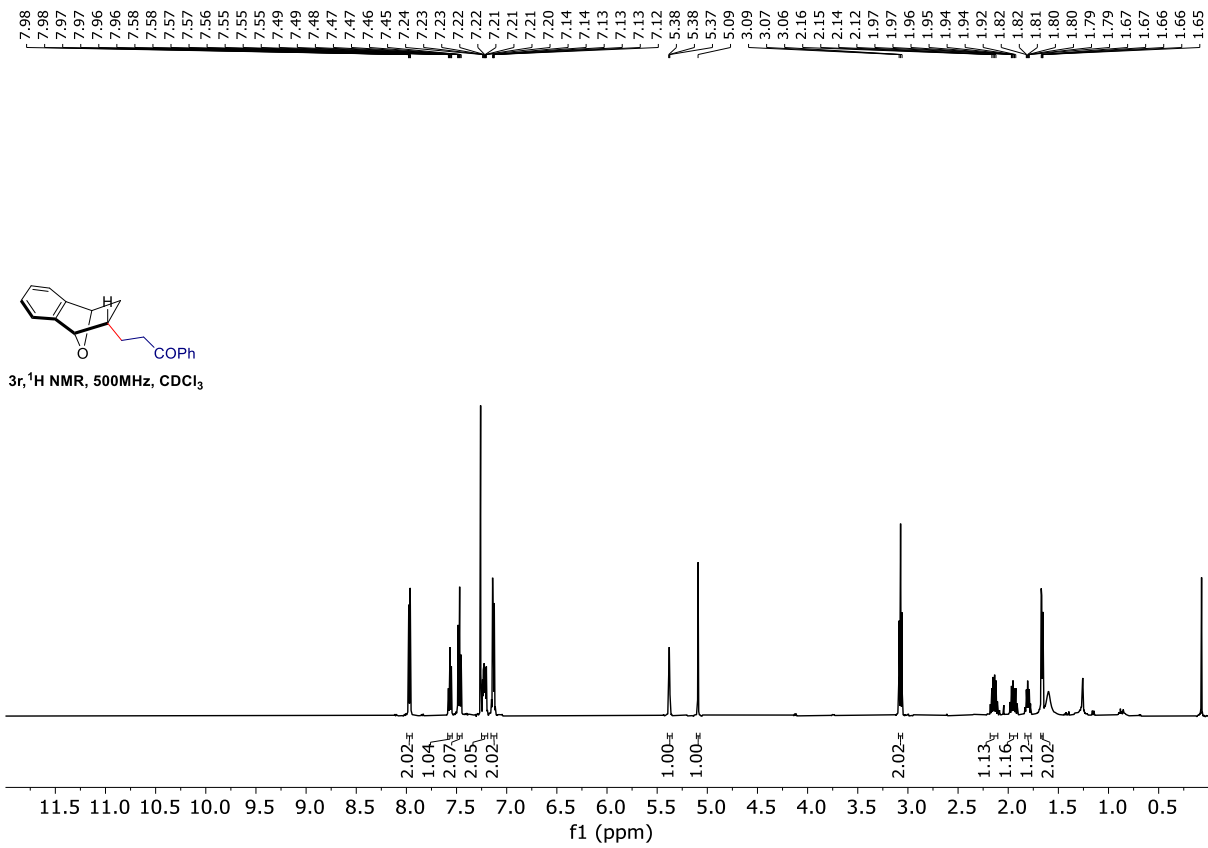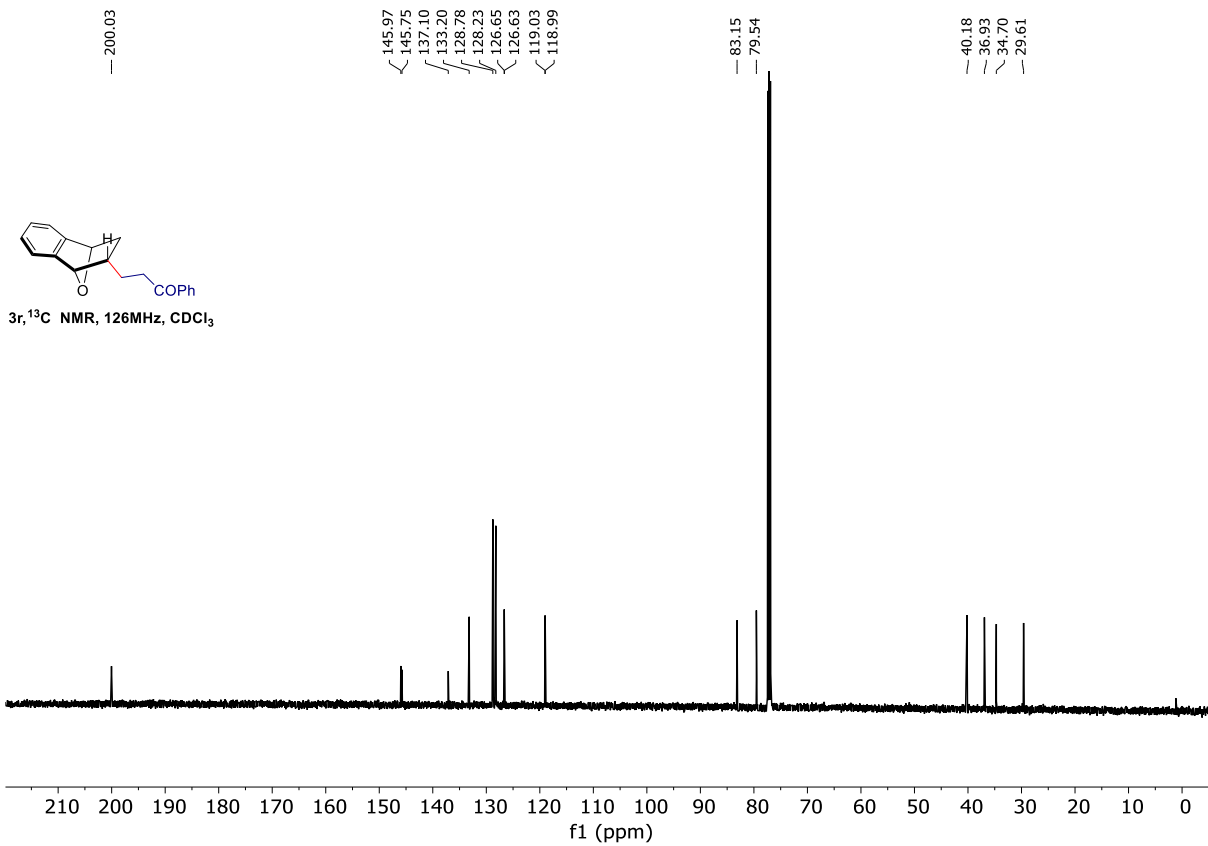



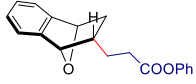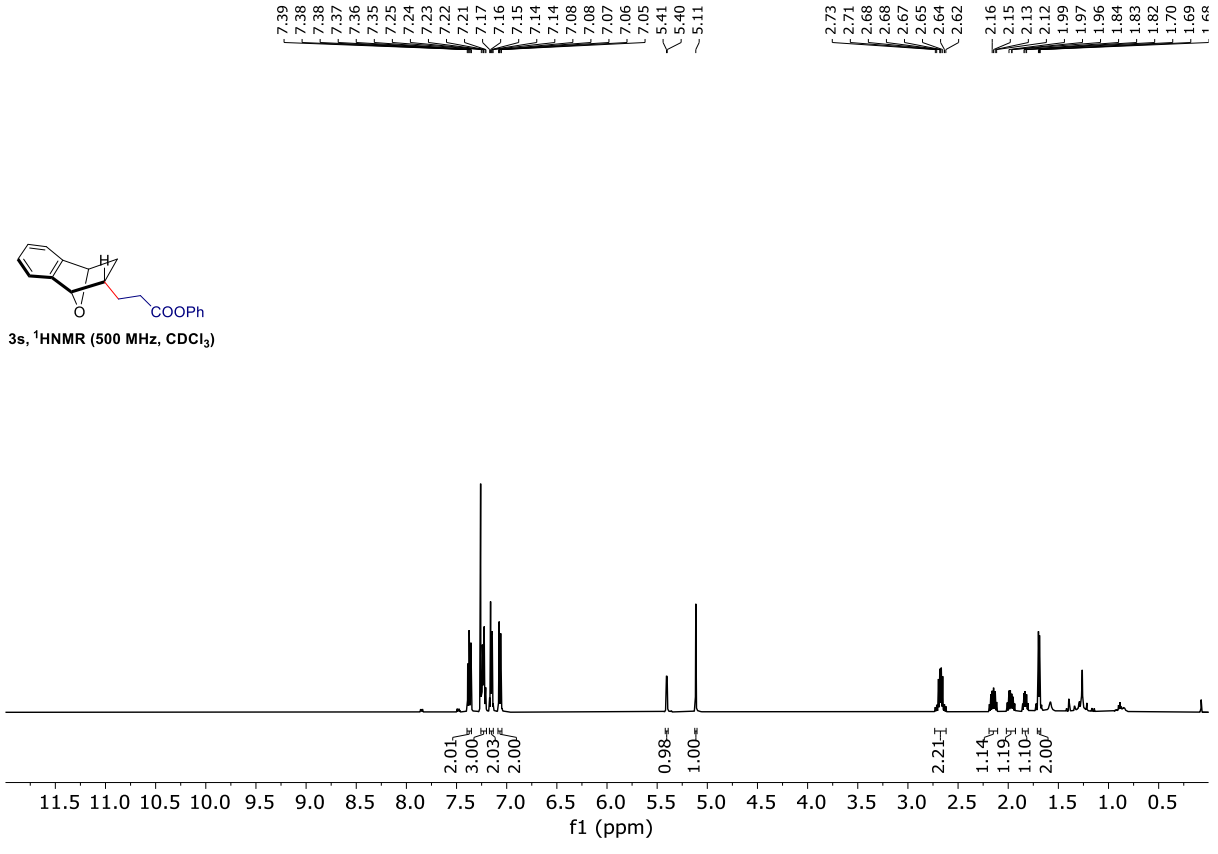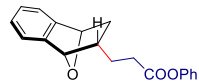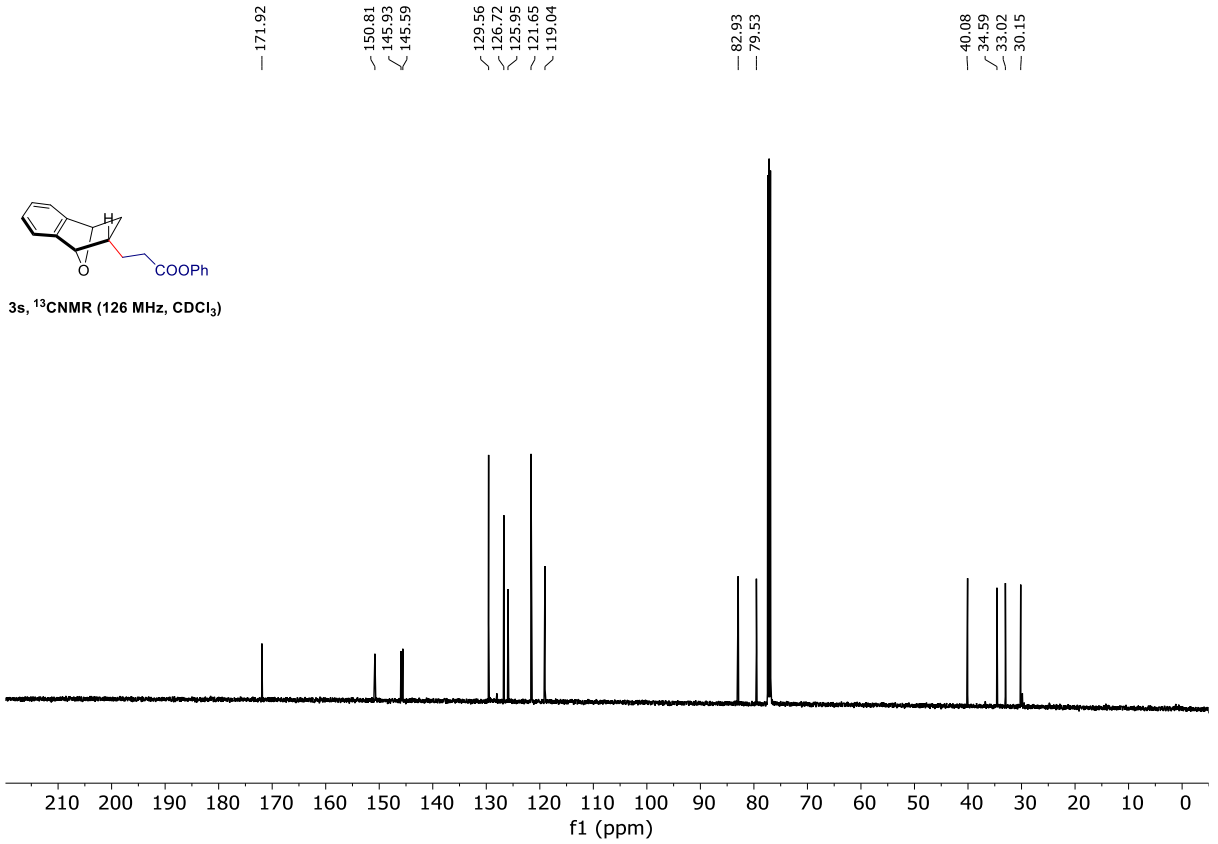

7.94  
7.93  
7.92  
7.92  
7.89  
7.69  
7.68  
7.67  
7.66  
7.66  
7.66  
7.60  
7.60  
7.59  
7.57  
7.57  
7.21  
7.20  
7.20  
7.19  
7.19  
7.18  
7.15  
7.14  
7.13  
7.13  
7.12  
5.34  
5.33  
4.98  
3.19  
3.18  
3.17  
3.16  
2.10  
2.10  
2.09  
2.08  
2.07  
2.07  
2.05  
1.94  
1.93  
1.91  
1.91  
1.90  
1.83  
1.83  
1.82  
1.81  
1.81  
1.80  
1.80  
1.64  
1.63  
1.62  
1.60  
1.55  
1.55  
1.55  
1.54  
1.53  
1.52

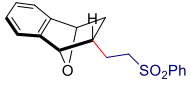

3t, <sup>1</sup>HNMR (500 MHz, CDCl<sub>3</sub>)

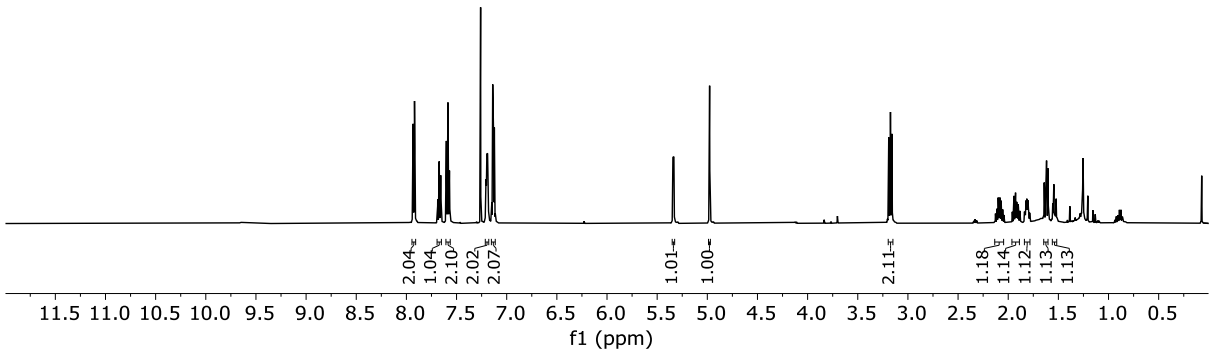

145.52  
144.94  
139.07  
133.82  
129.40  
128.09  
126.70  
118.98  
82.60  
79.33  
54.81  
39.28  
34.23  
27.72

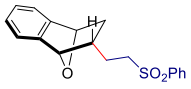

3t, <sup>13</sup>CNMR (126 MHz, CDCl<sub>3</sub>)

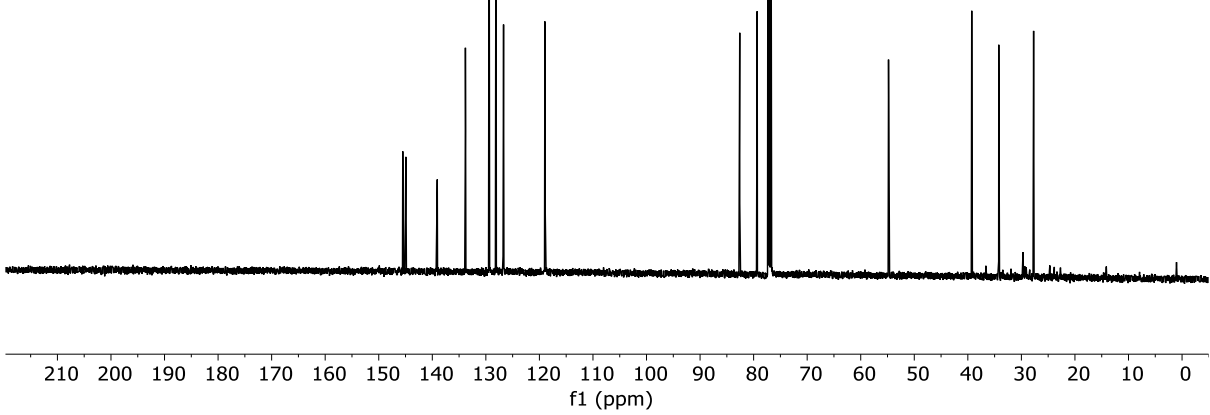

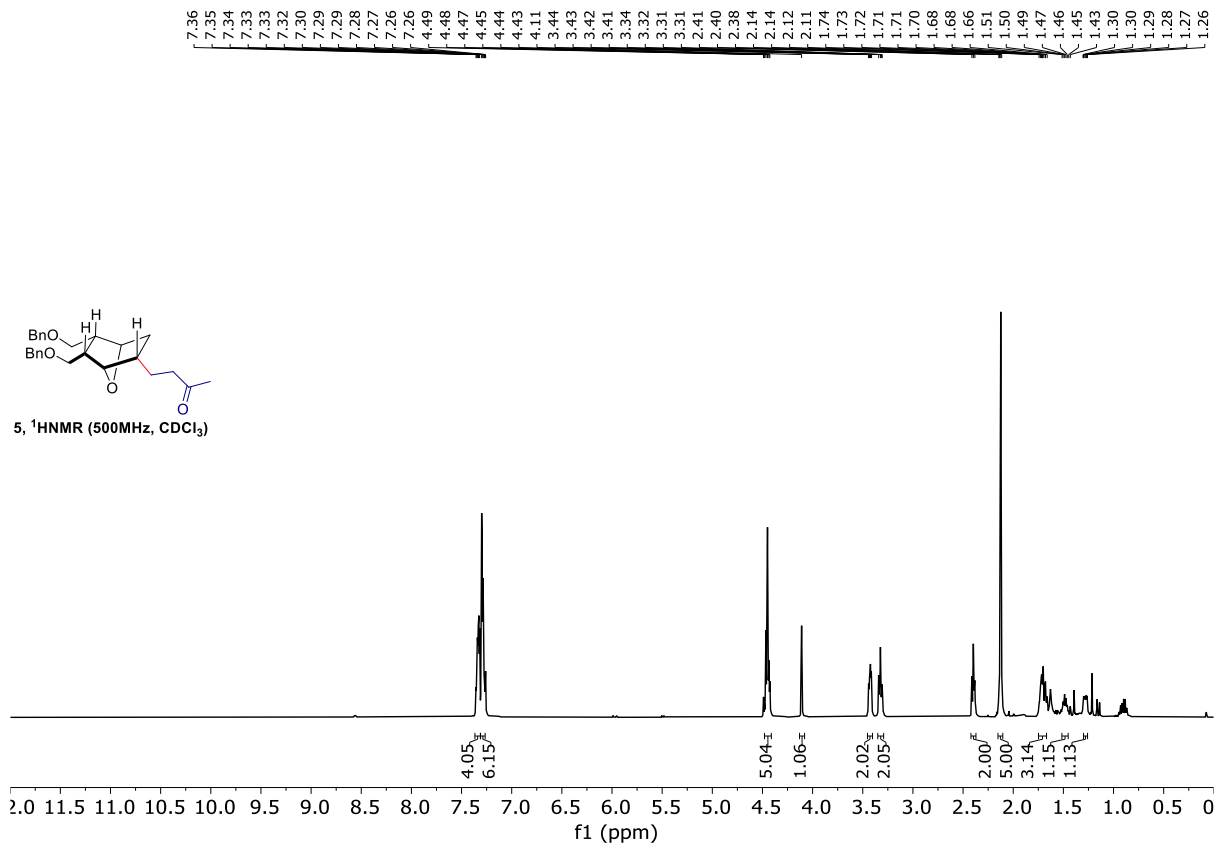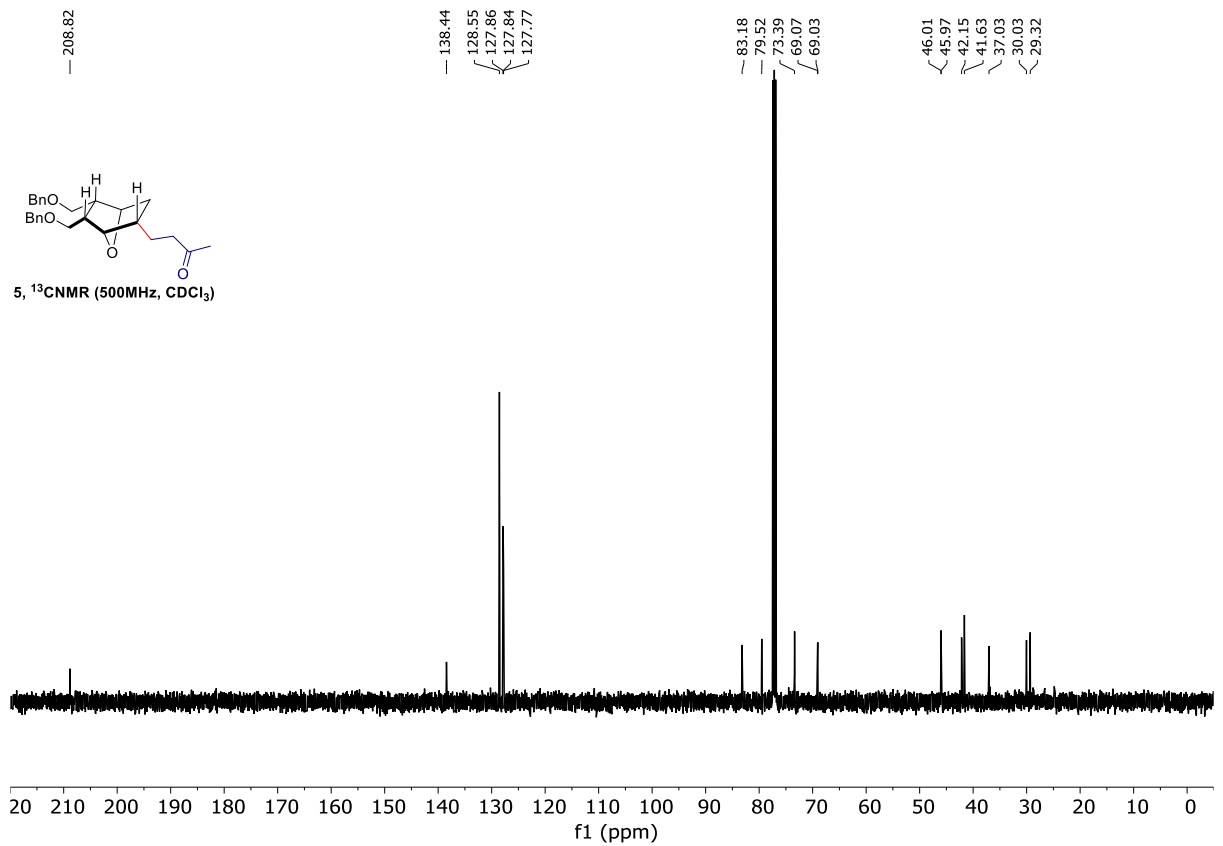

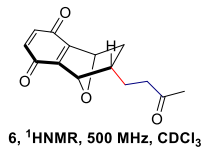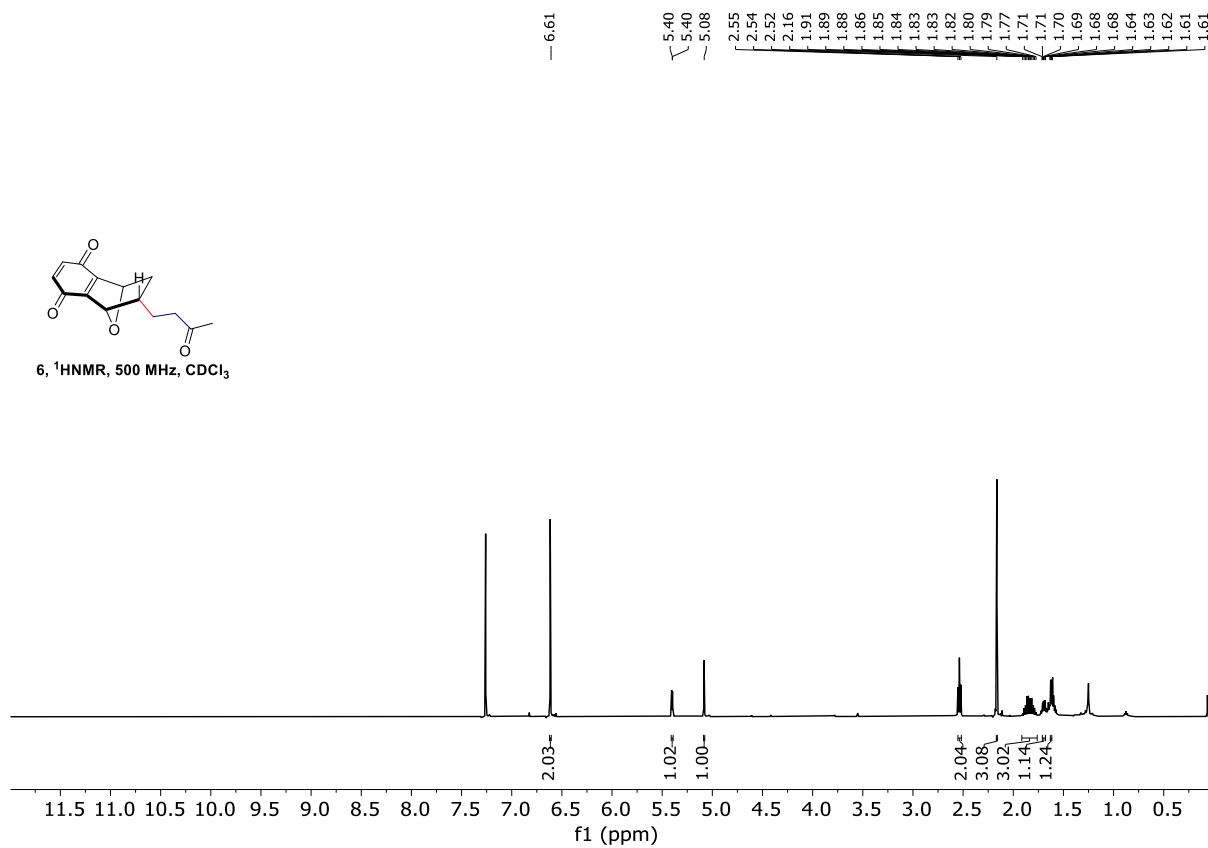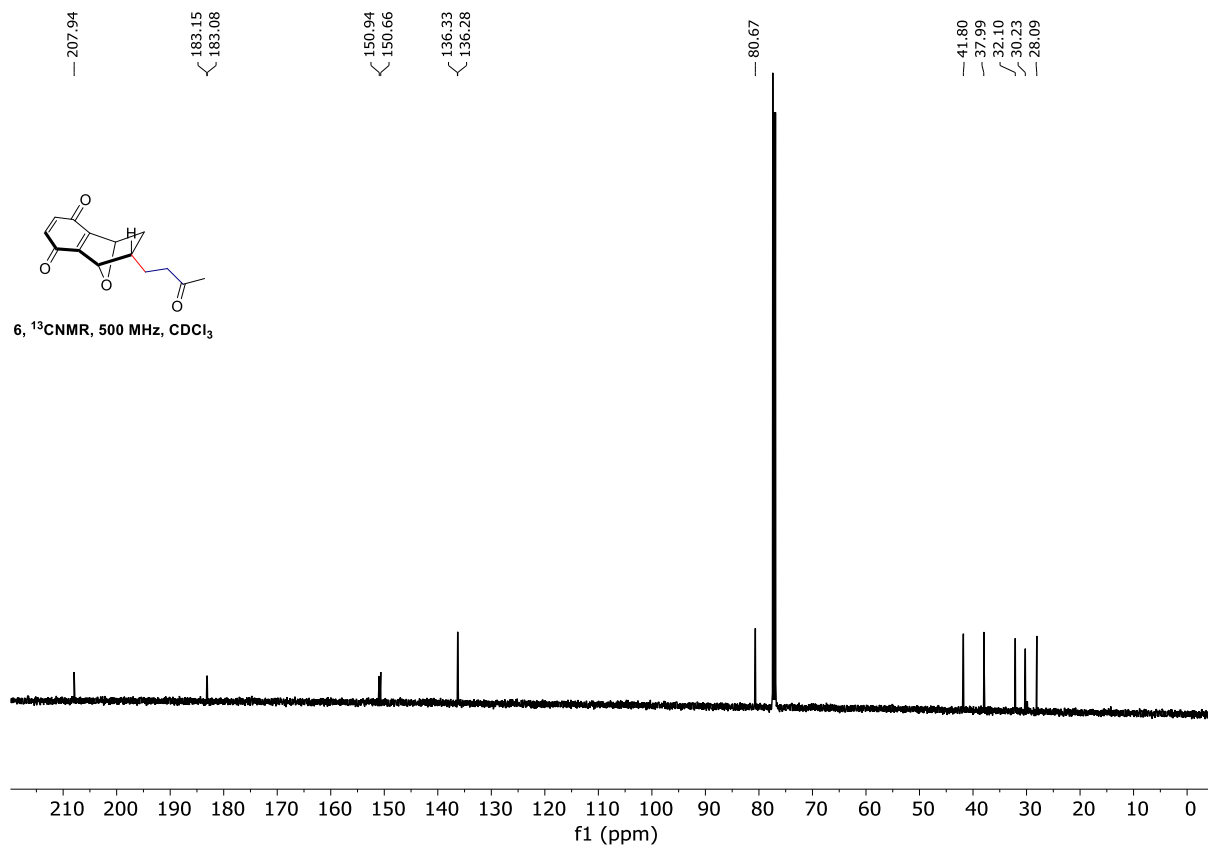

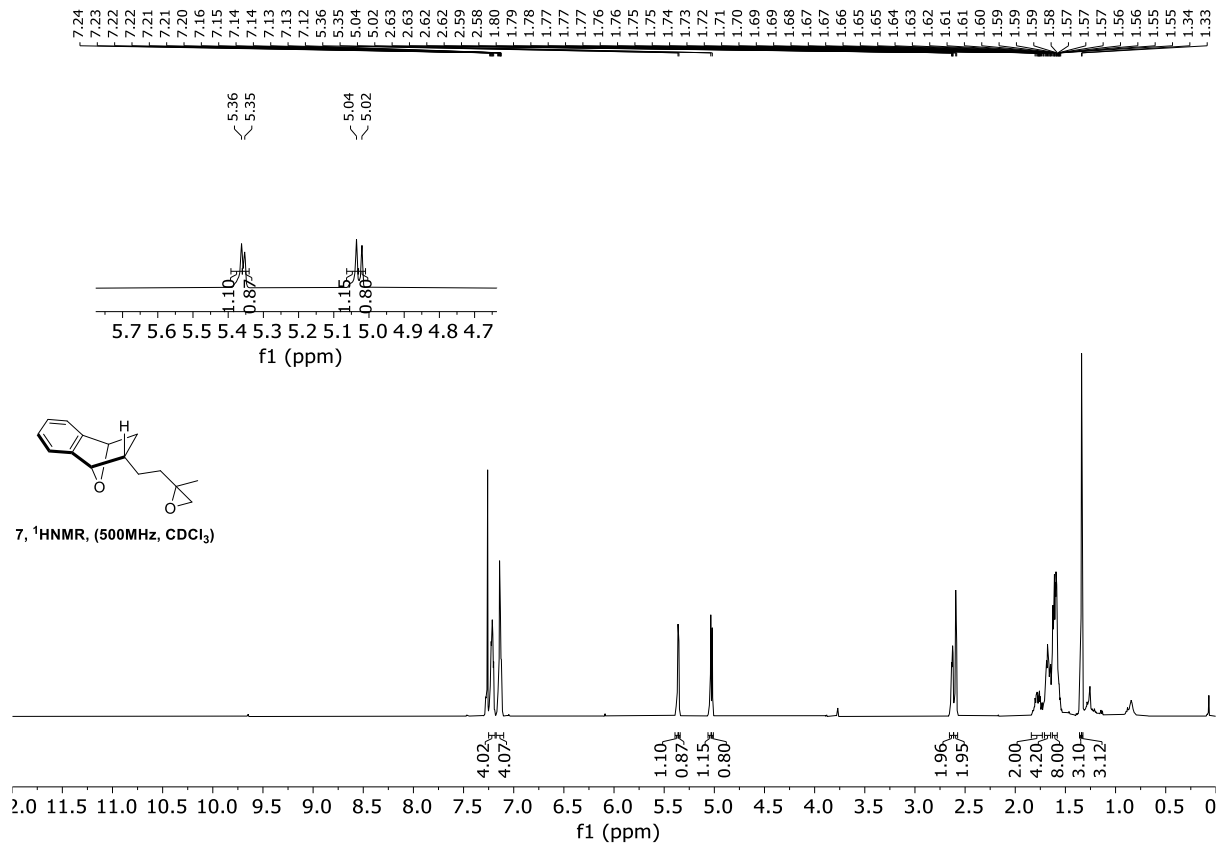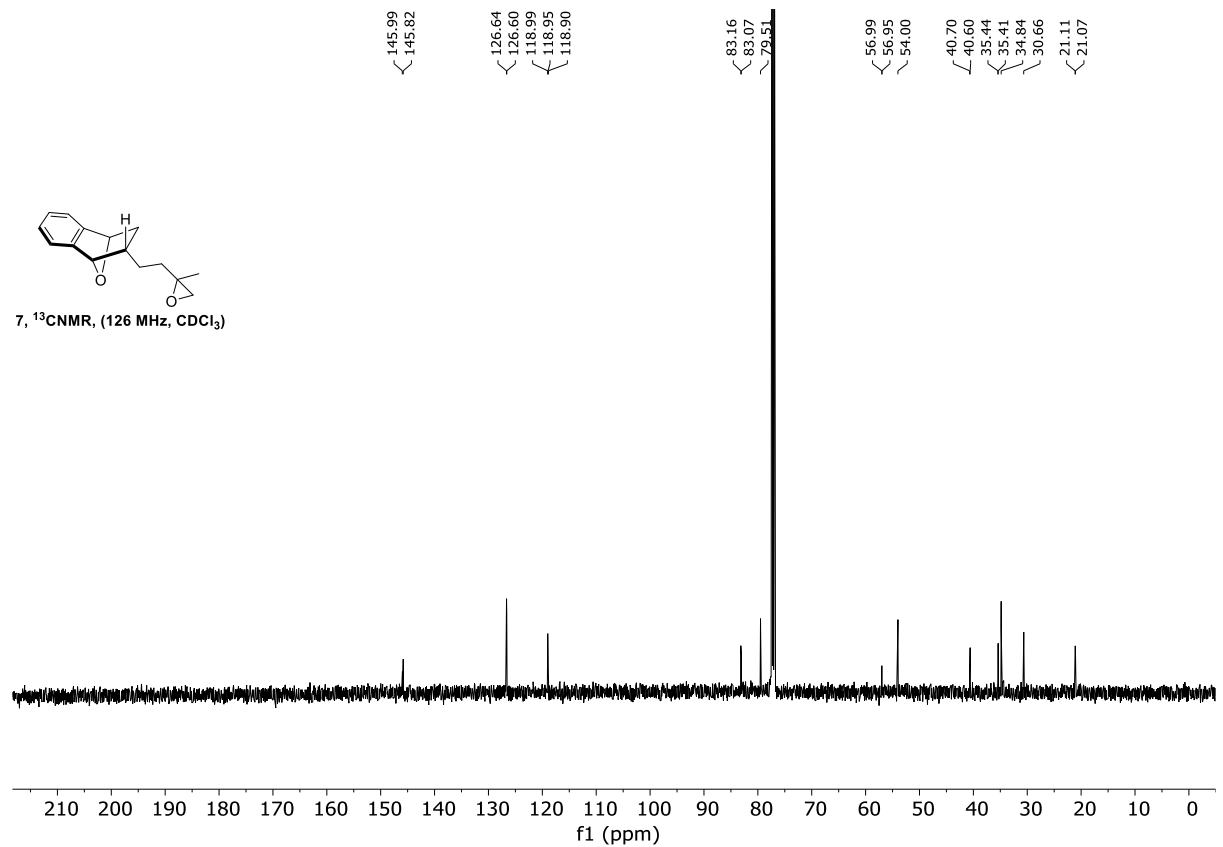

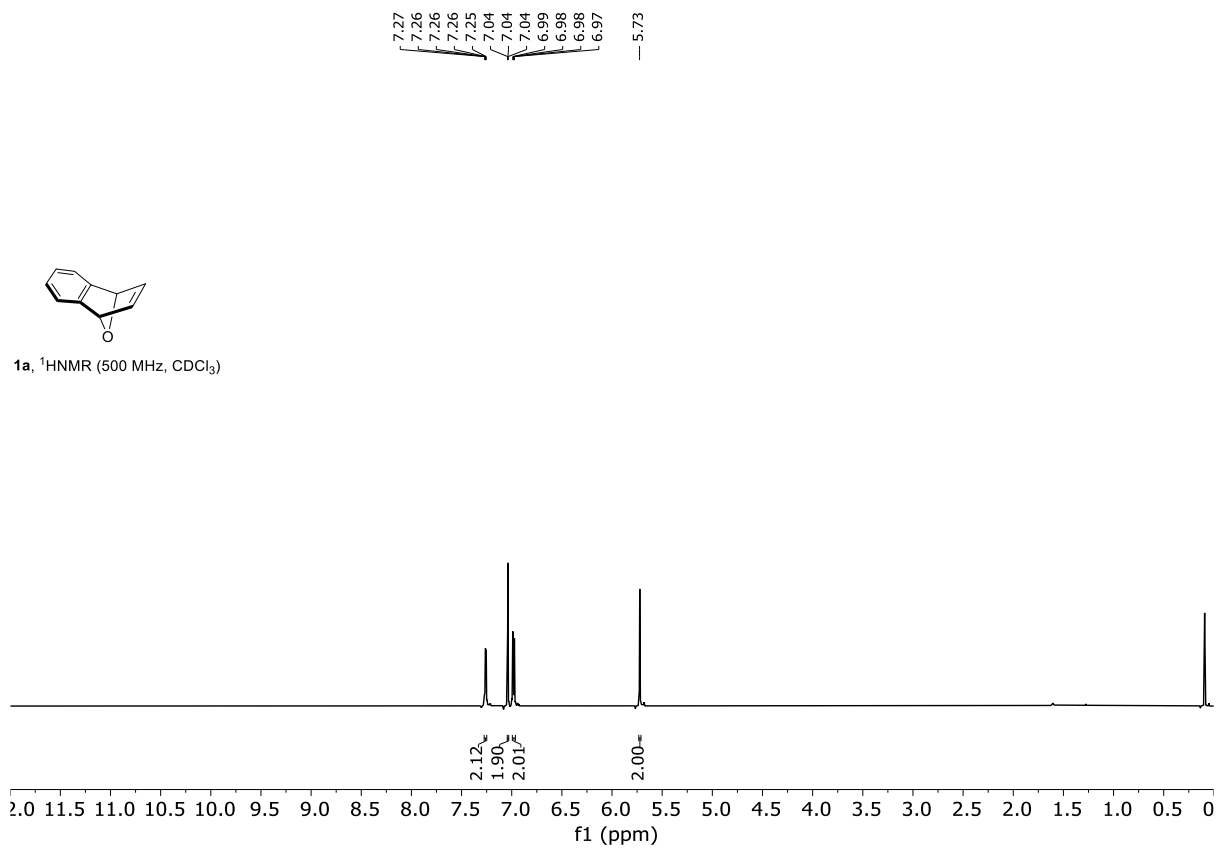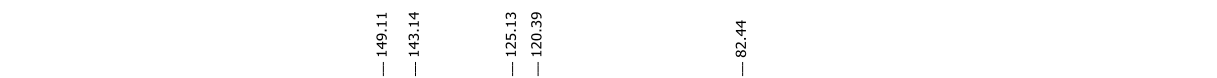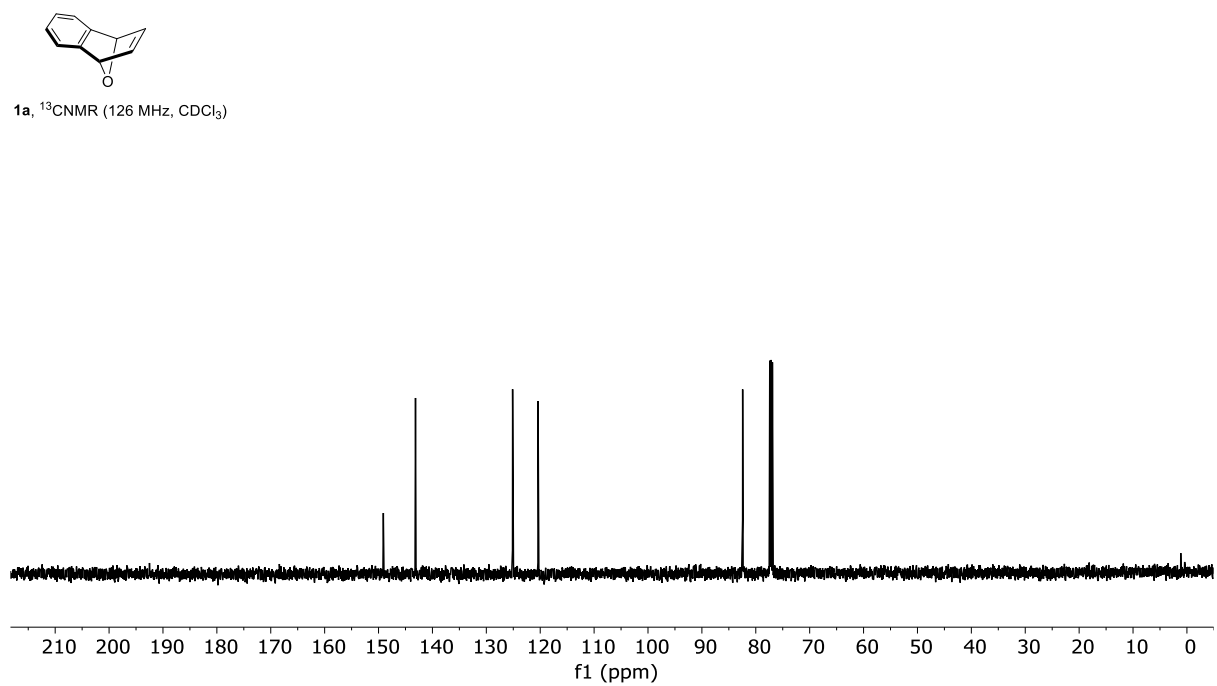

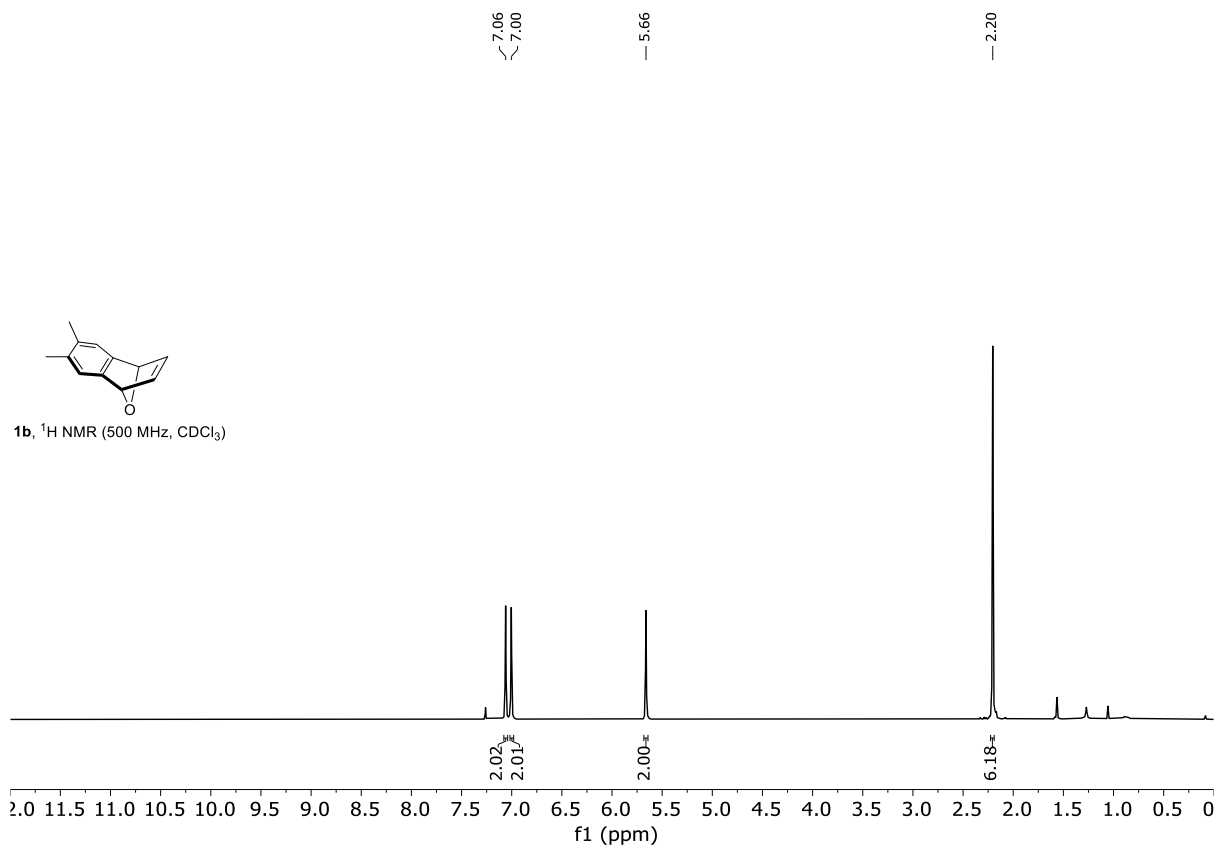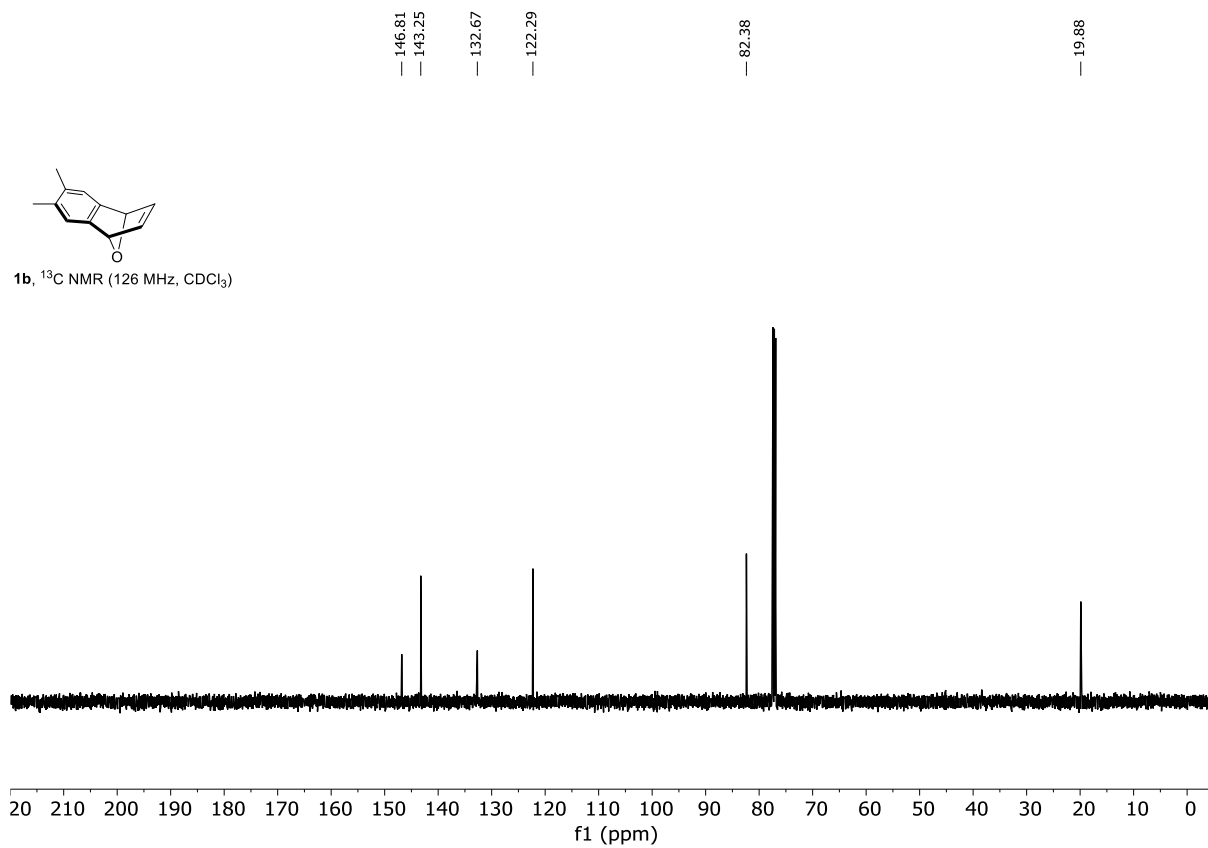

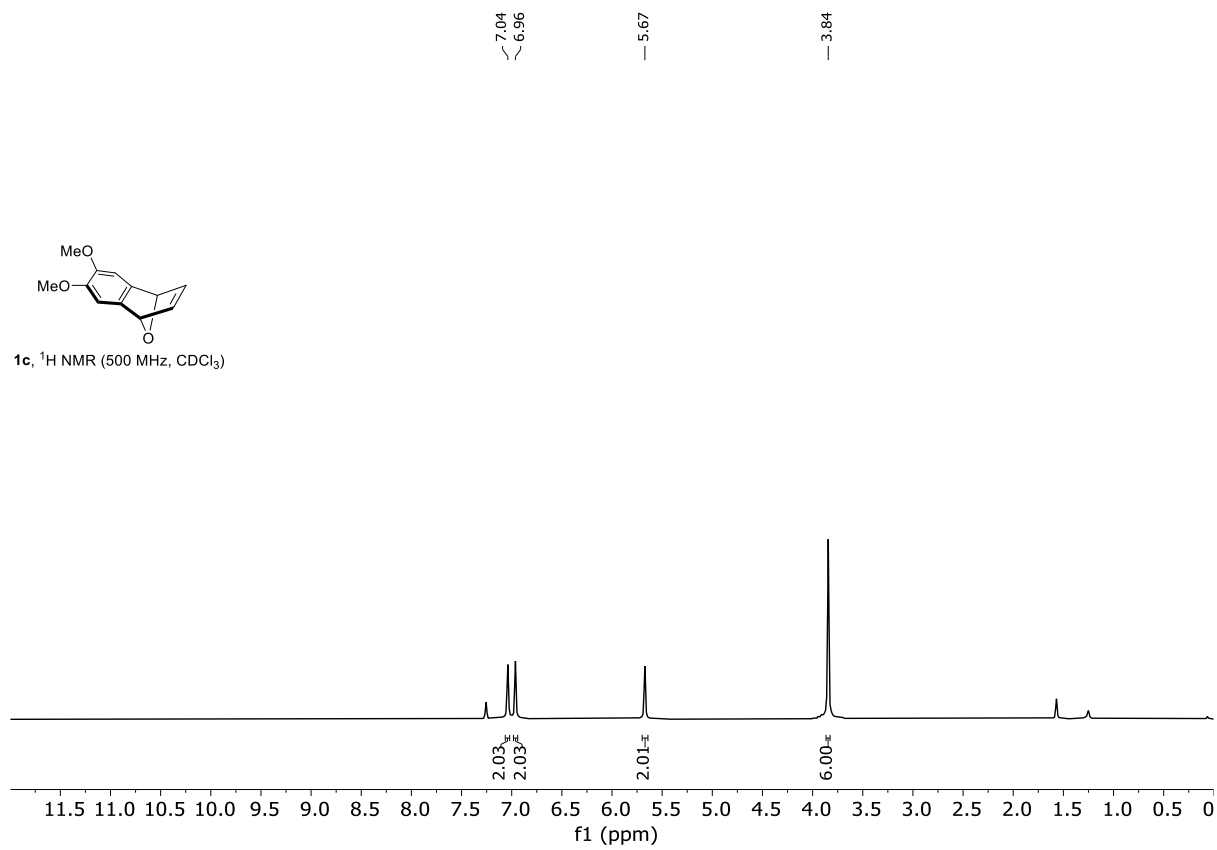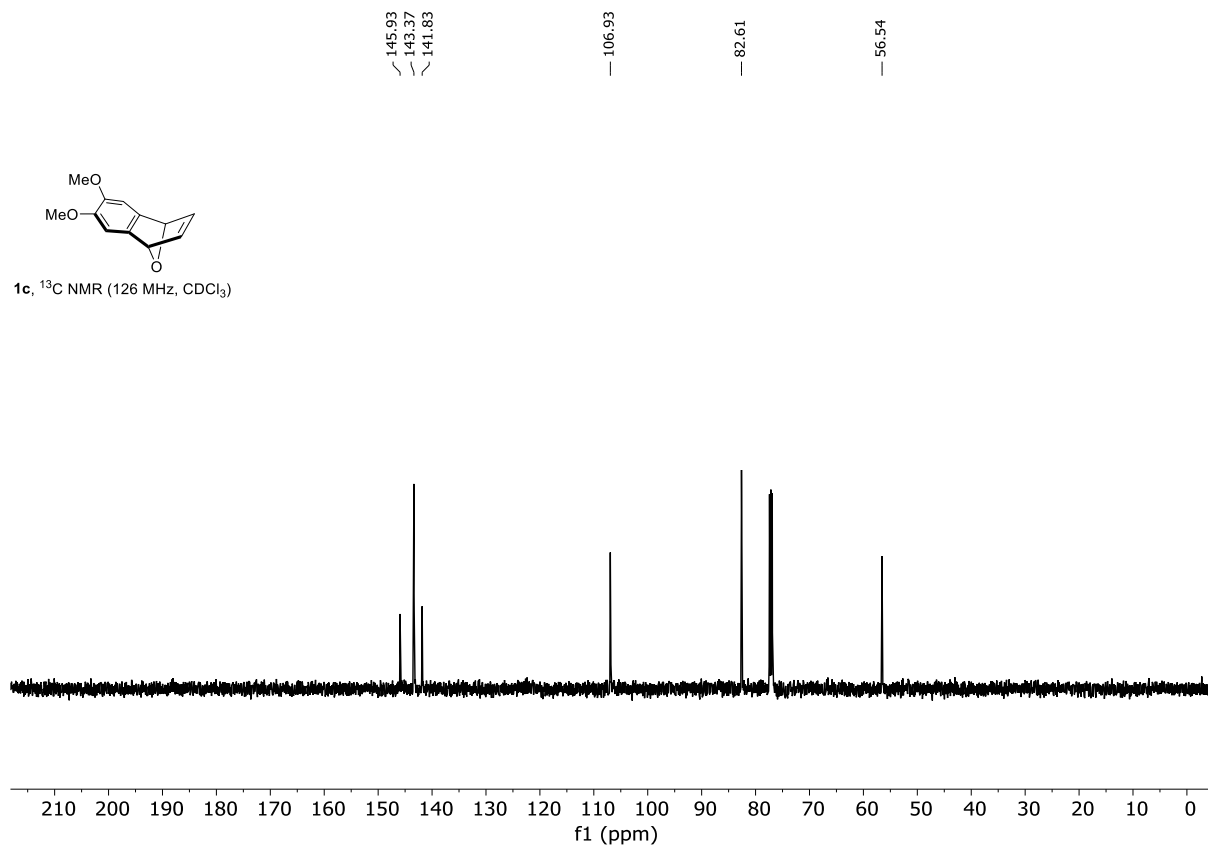



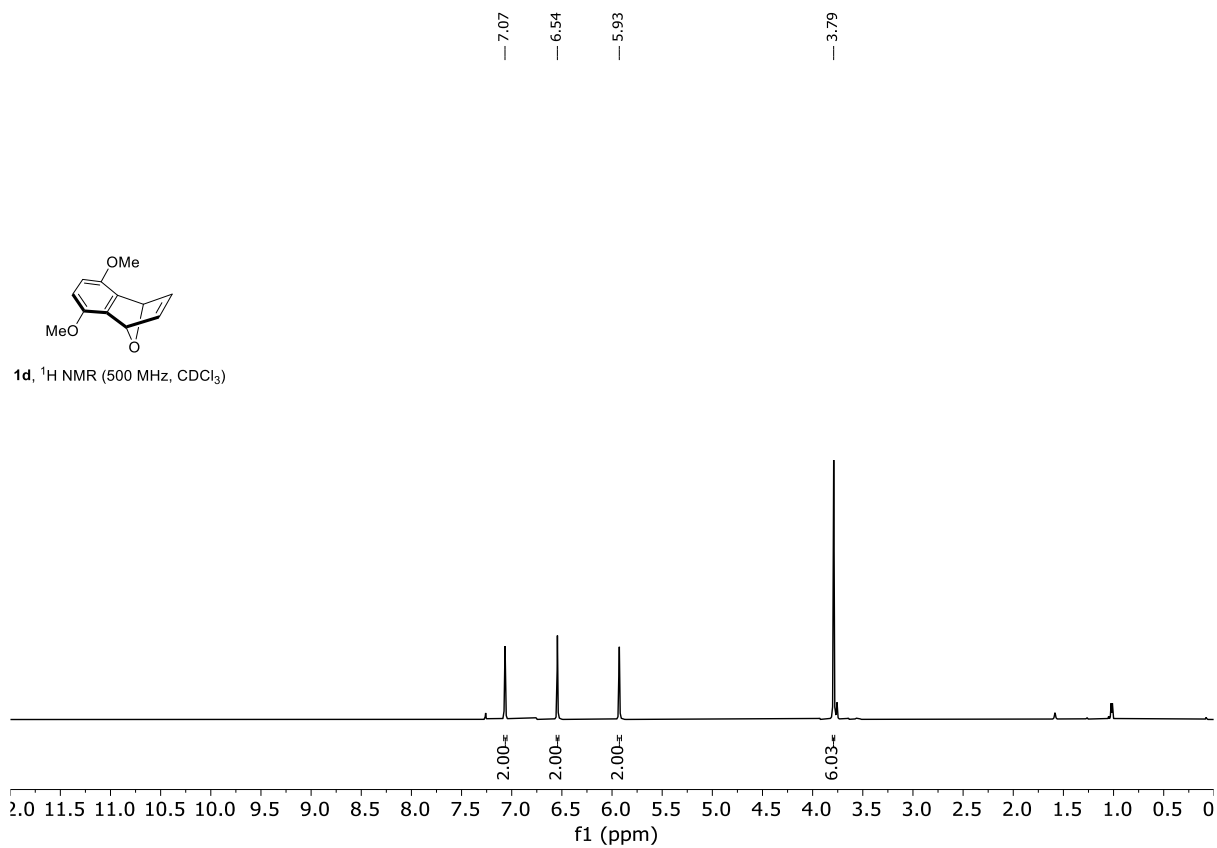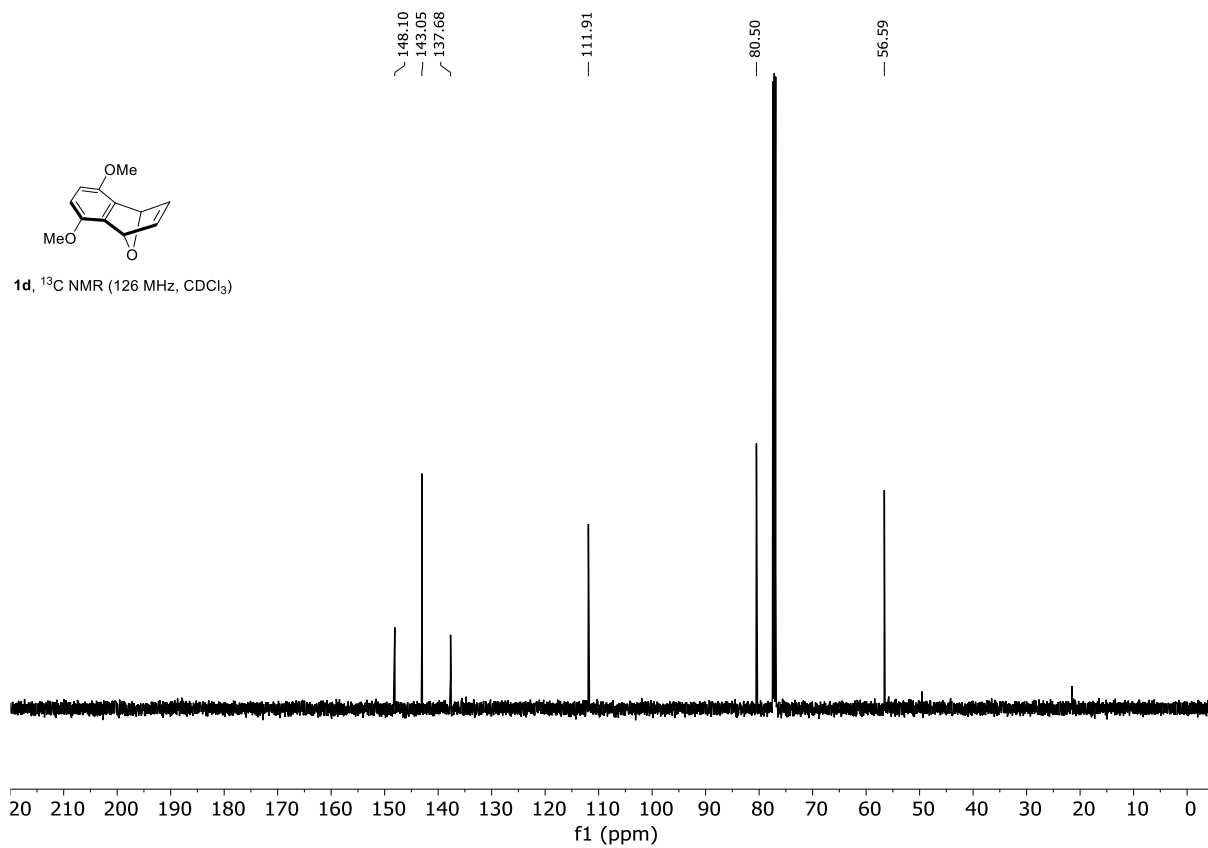

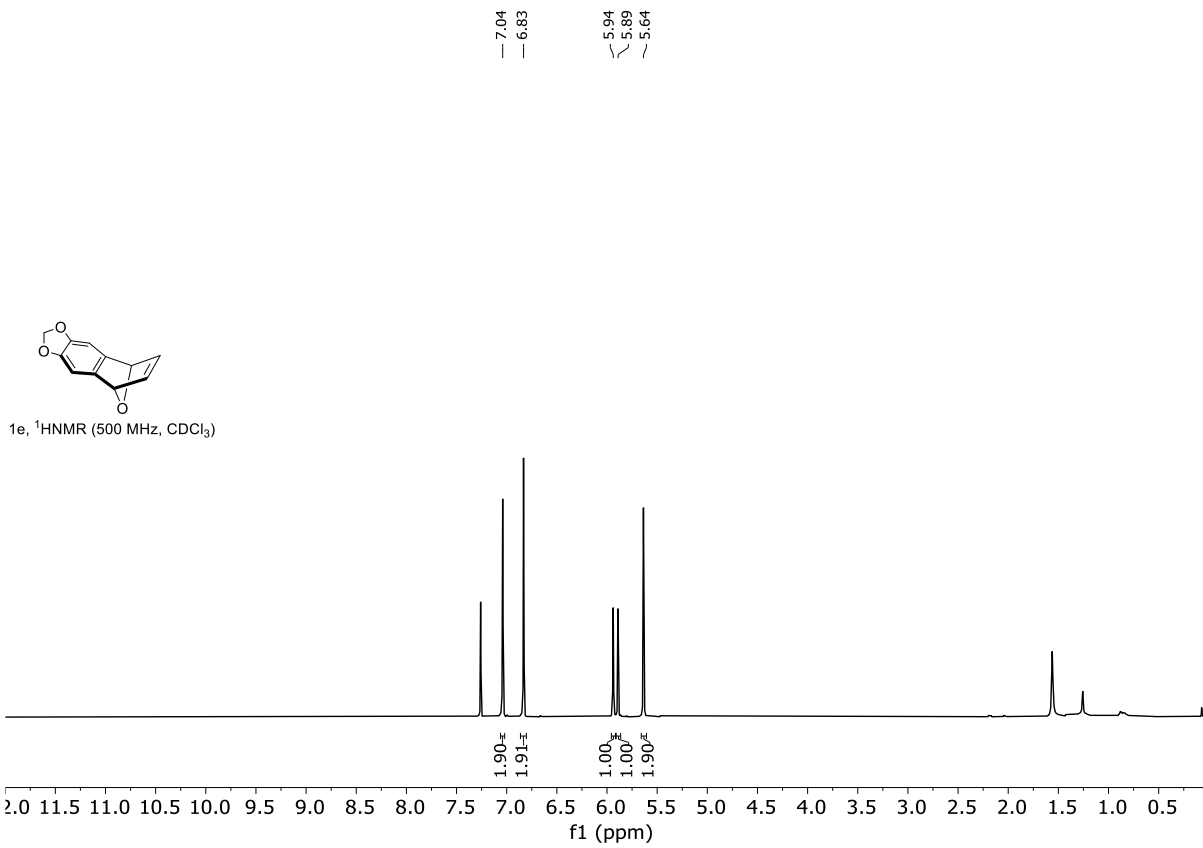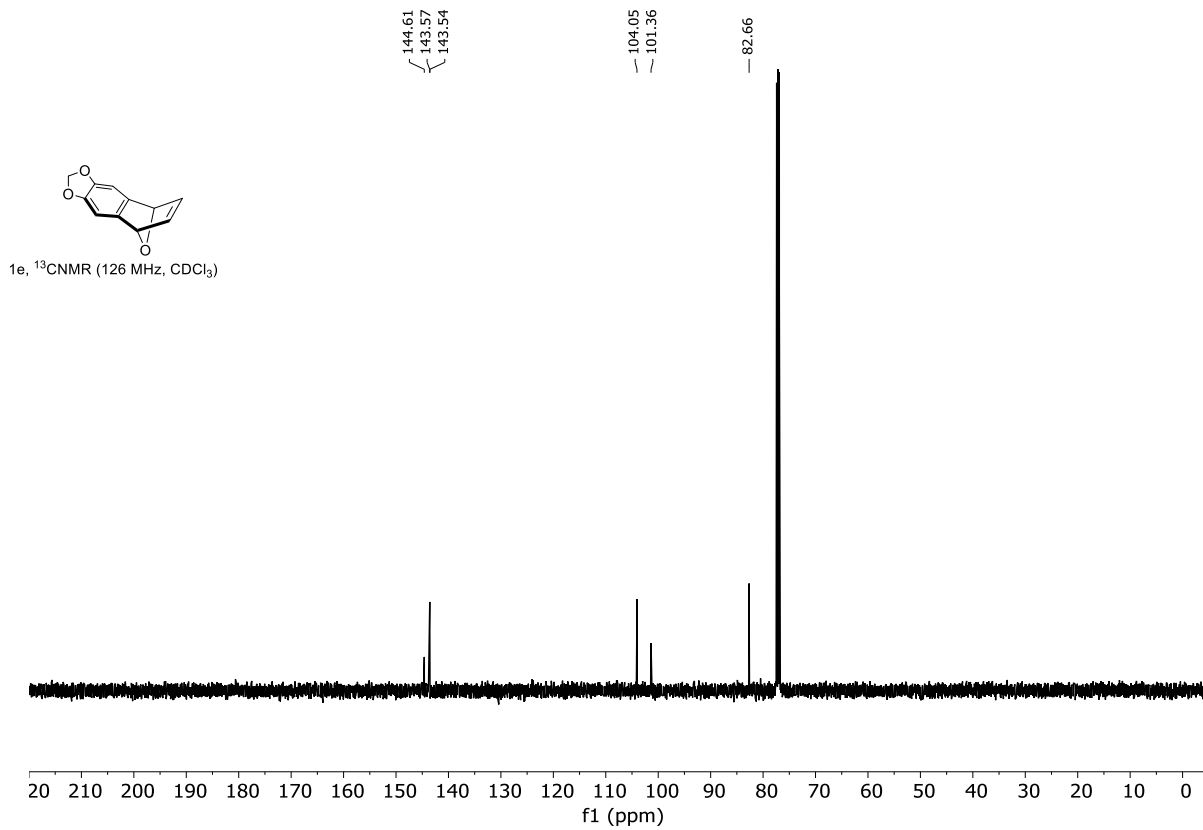

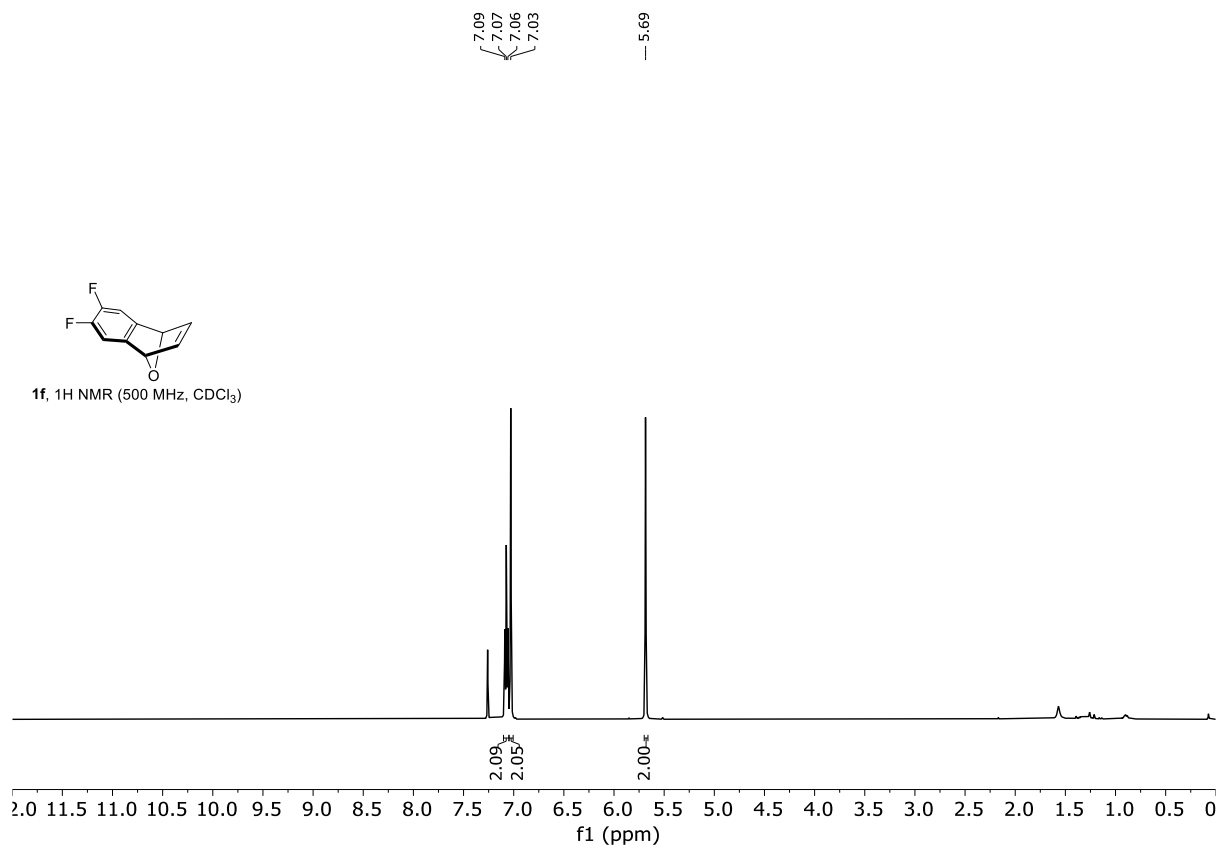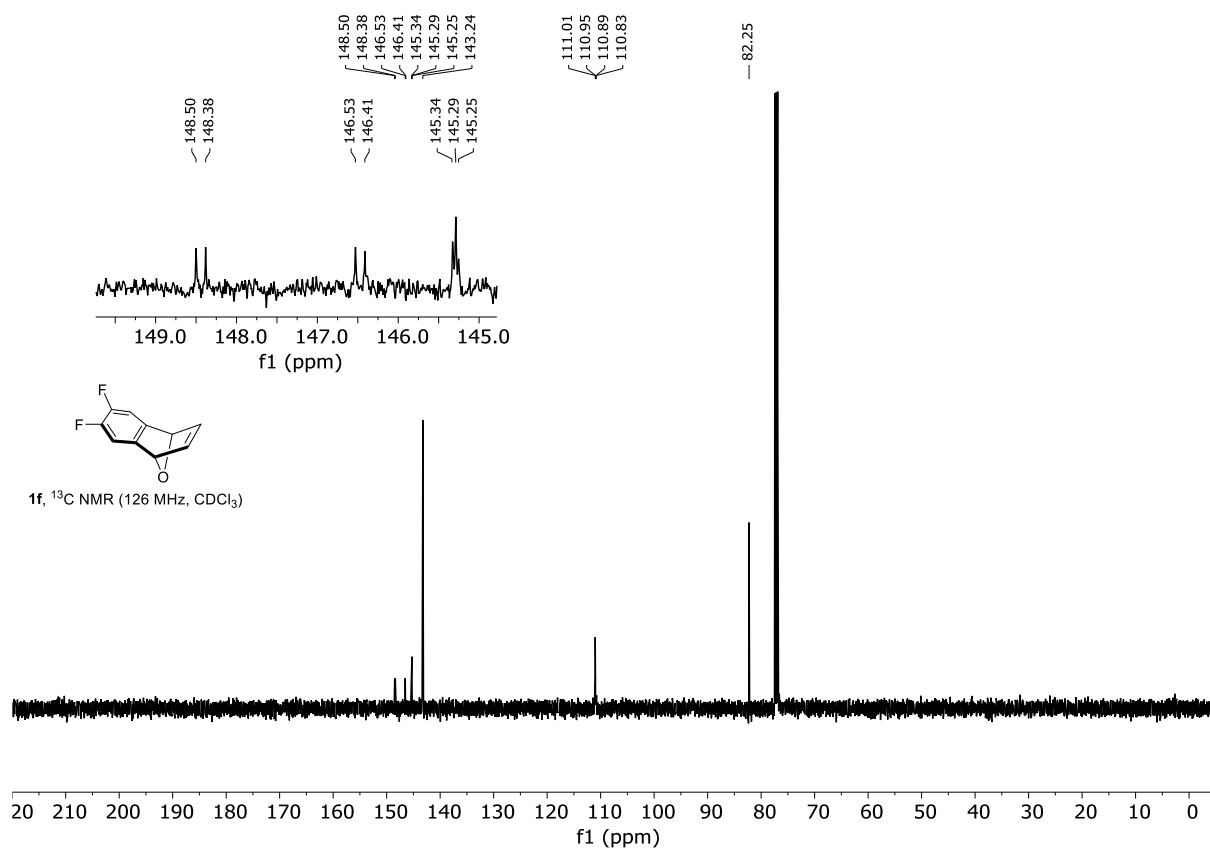

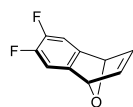

1f,  $^{19}\text{F}$  NMR (471 MHz,  $\text{CDCl}_3$ )

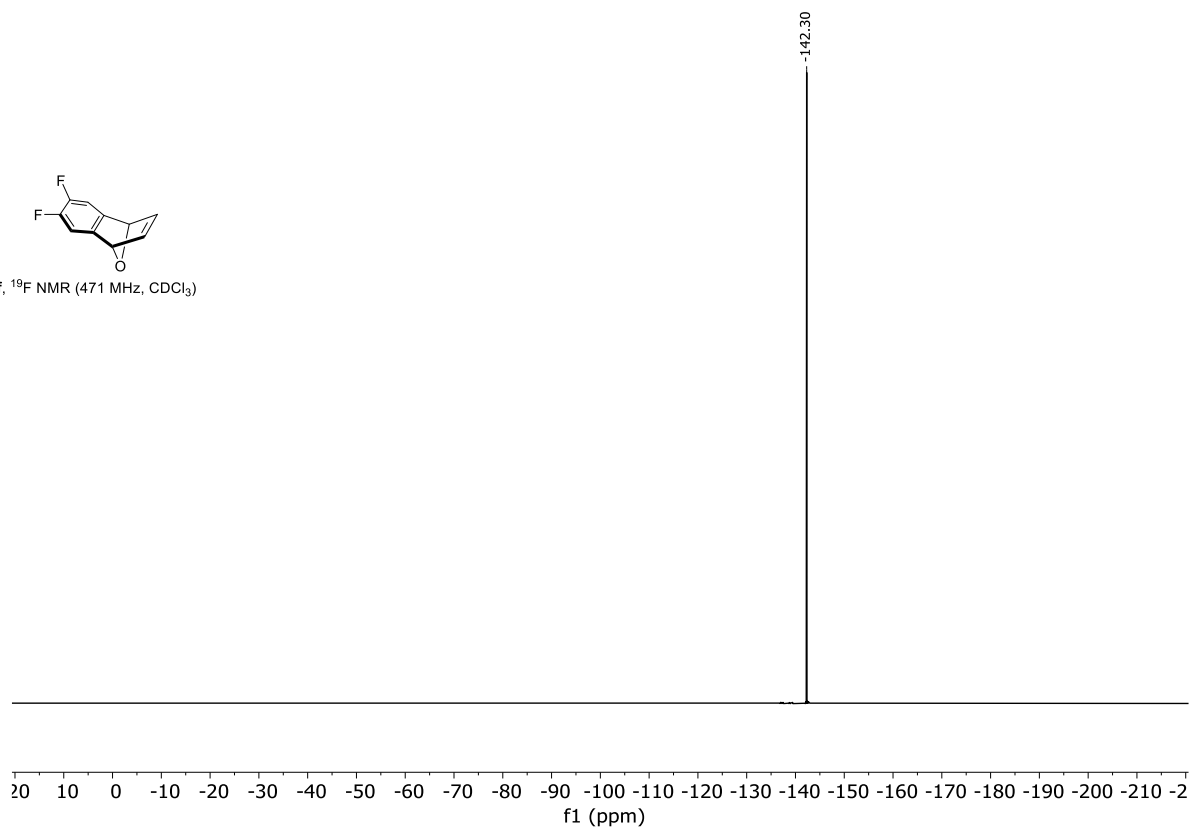

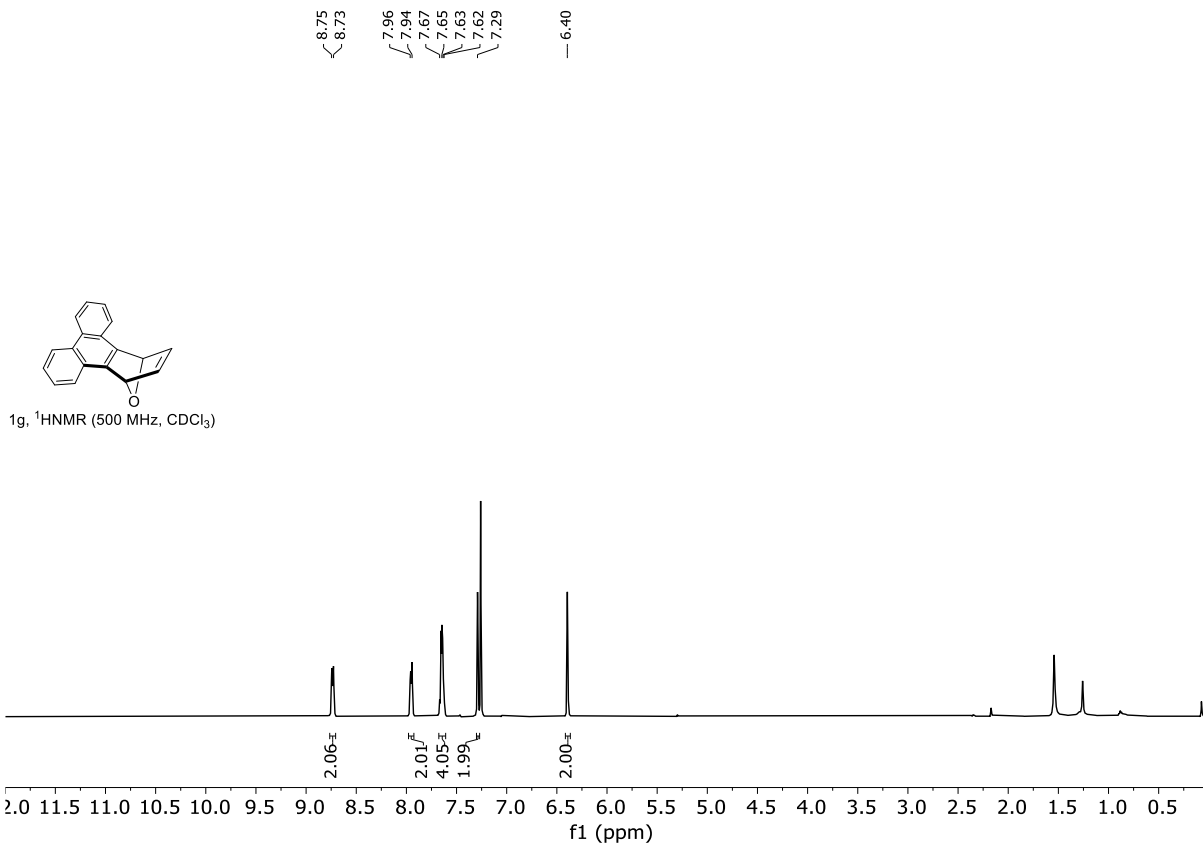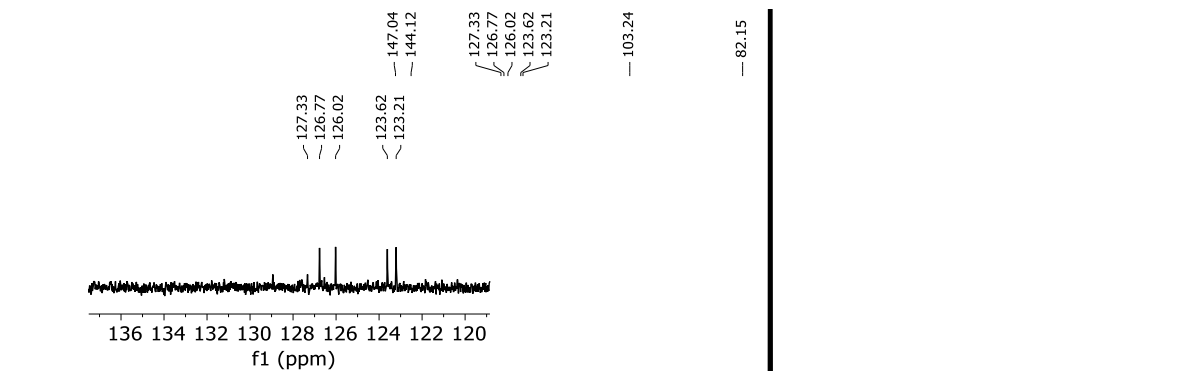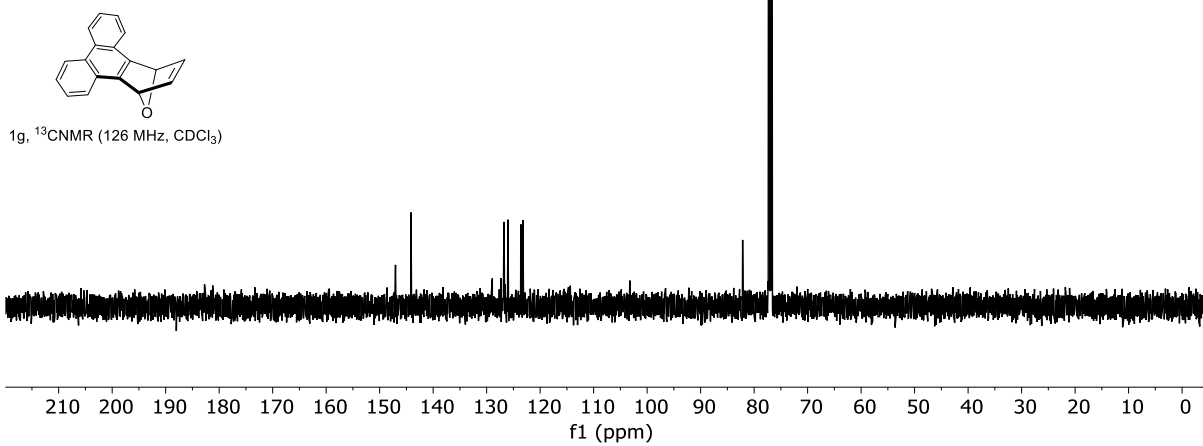

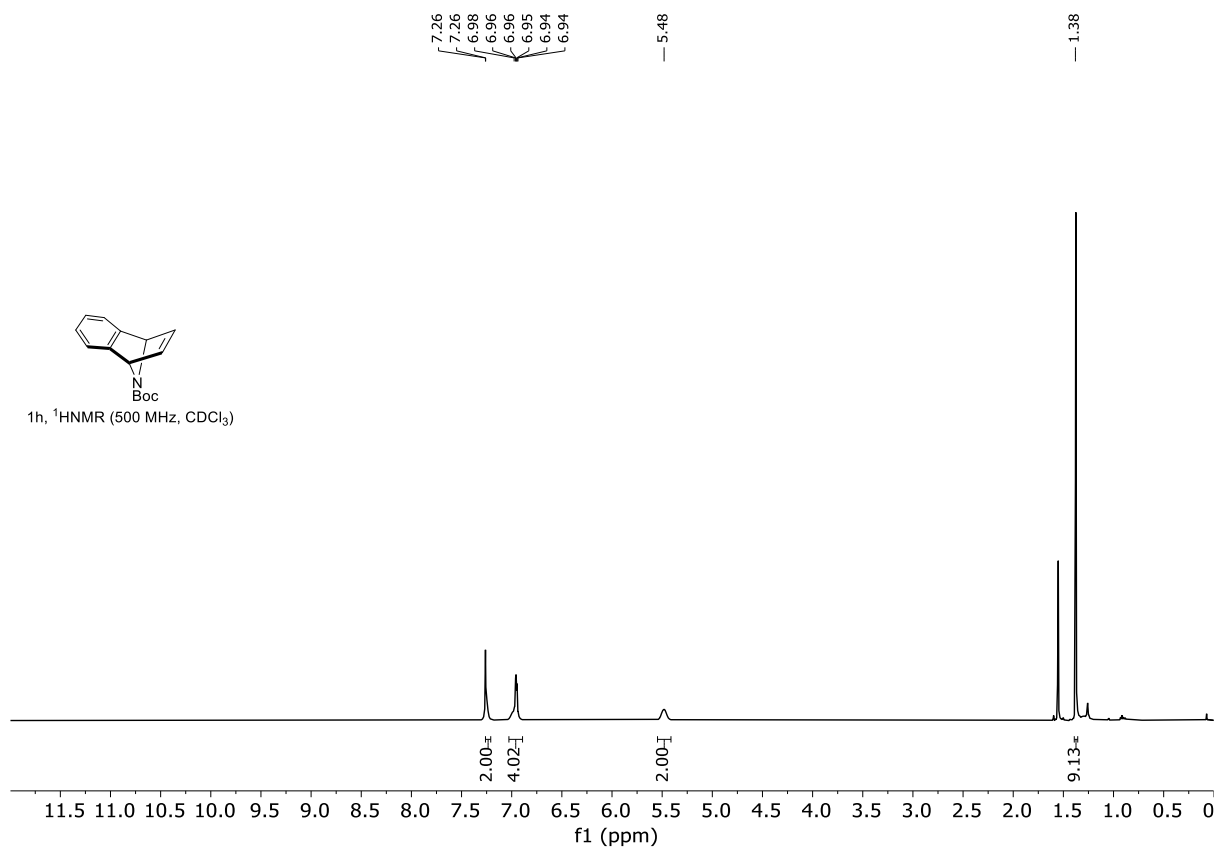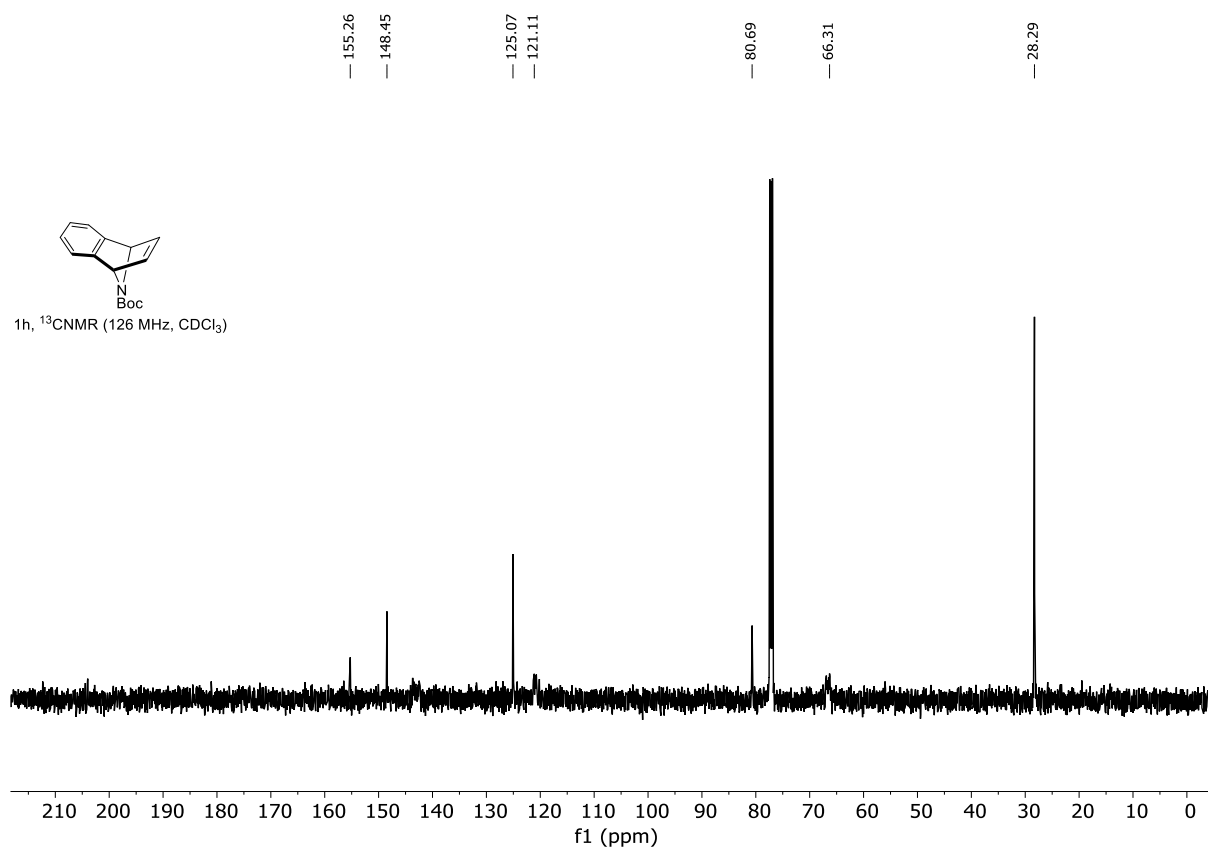

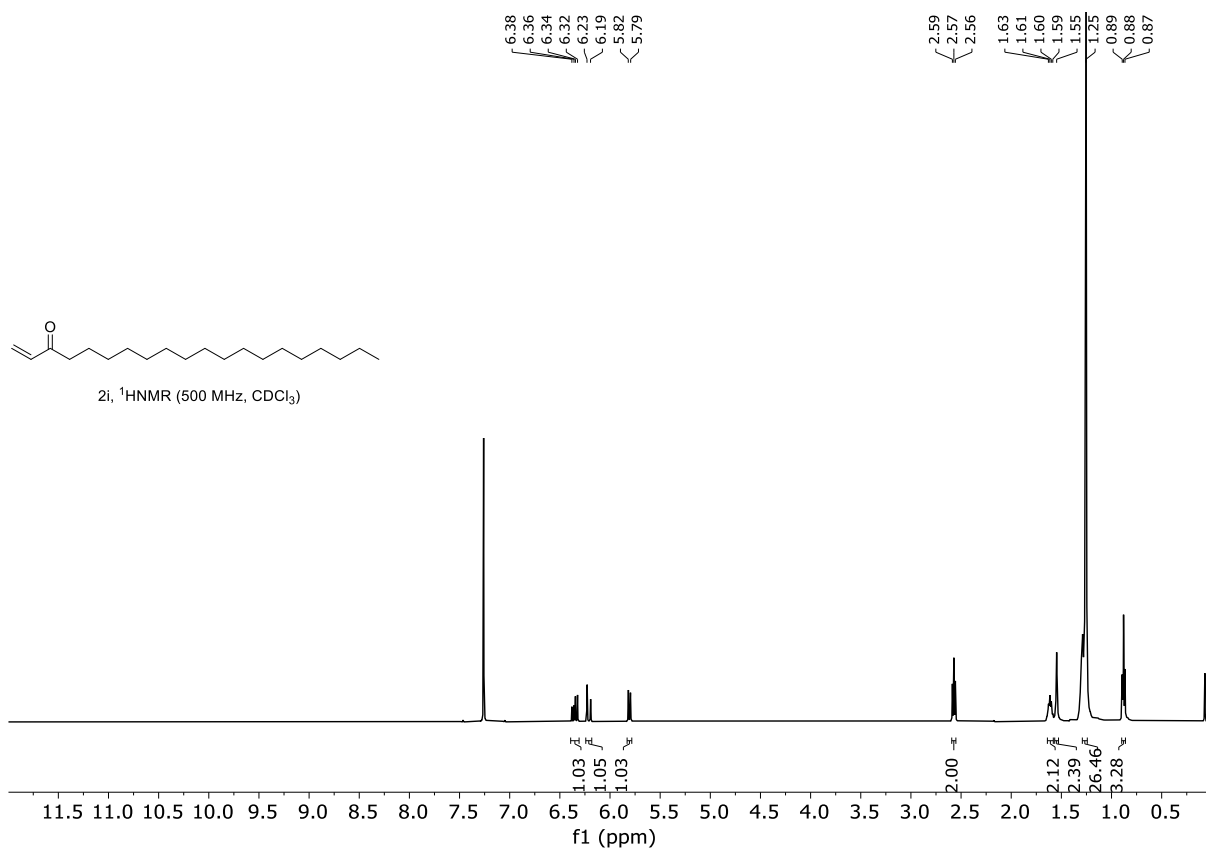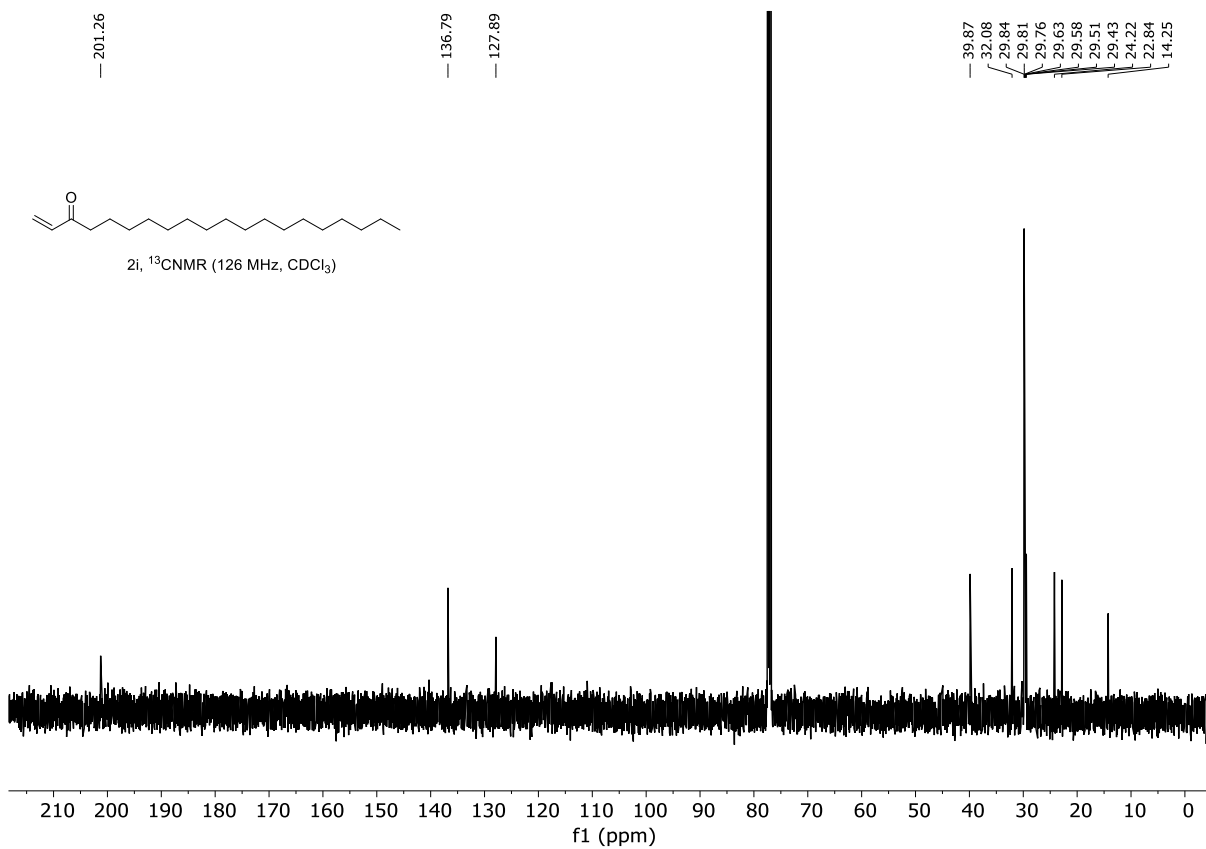

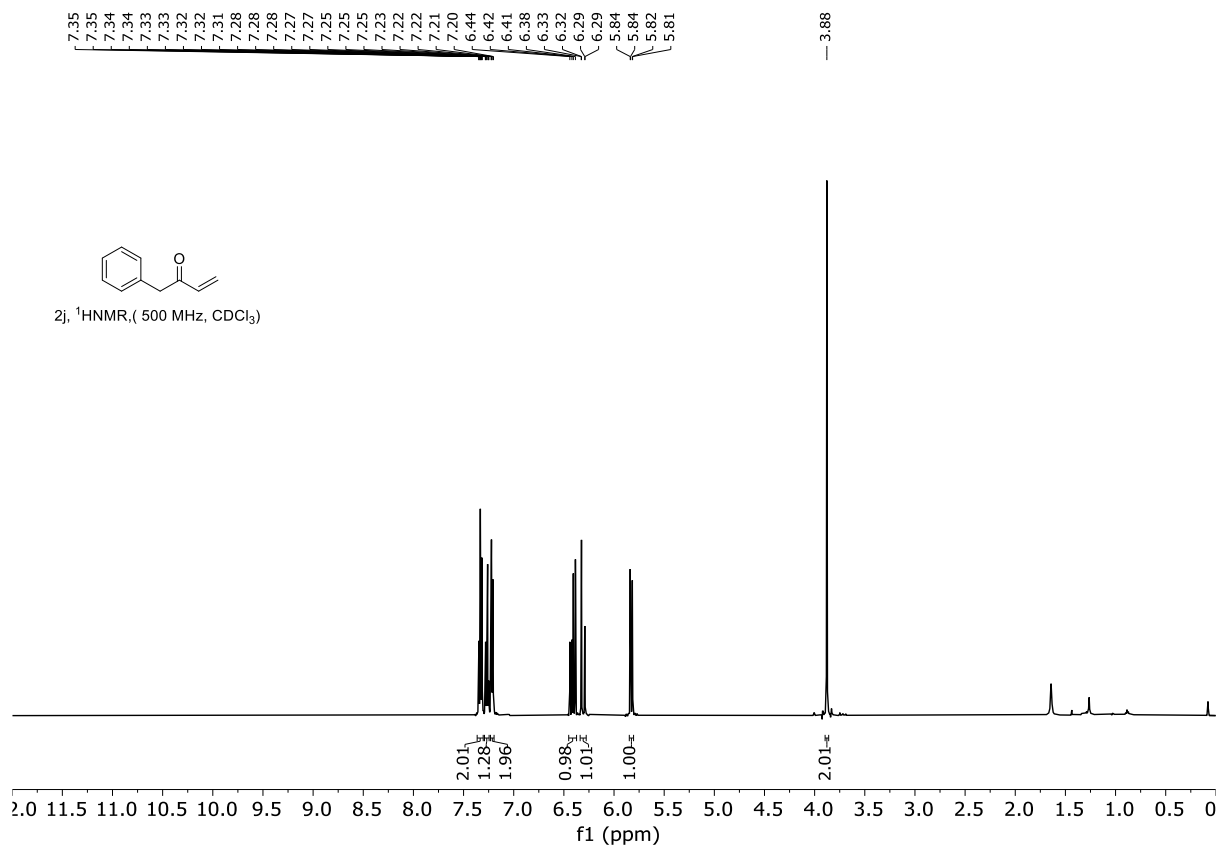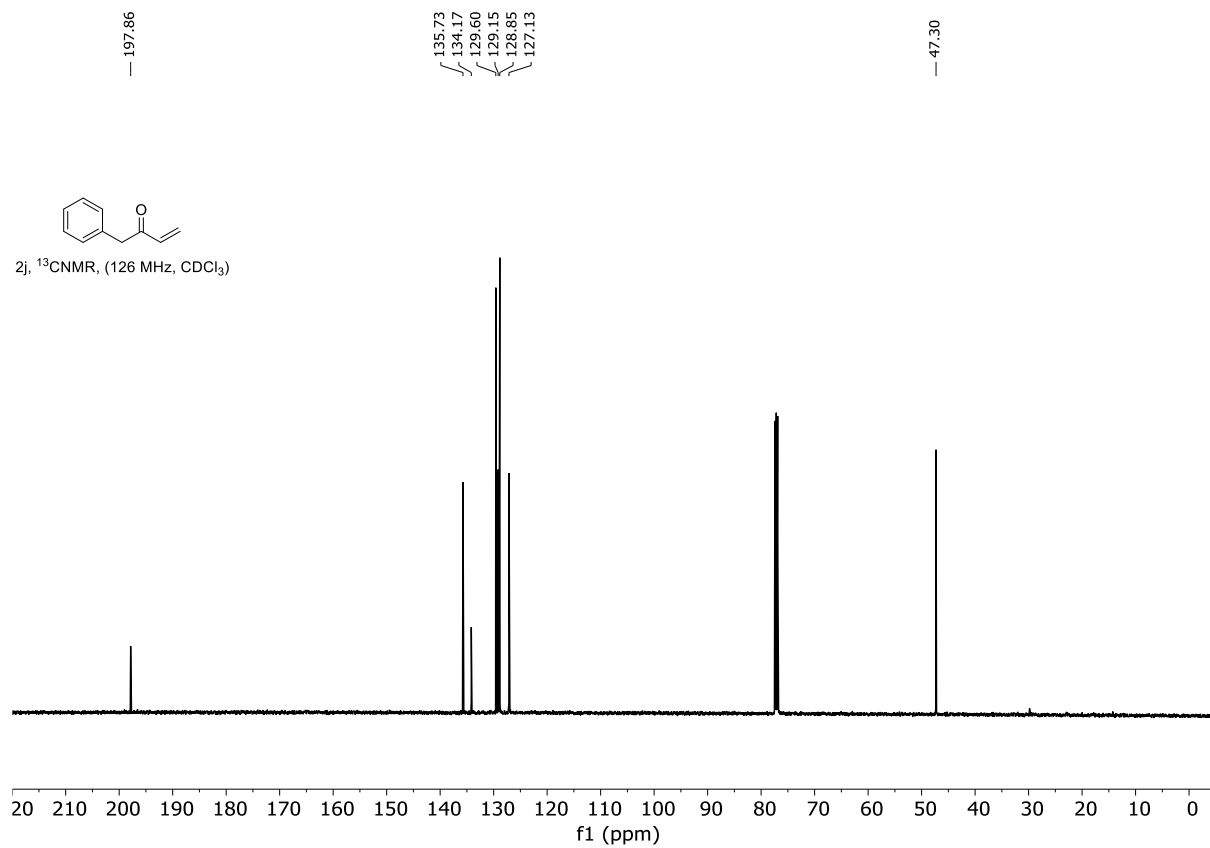



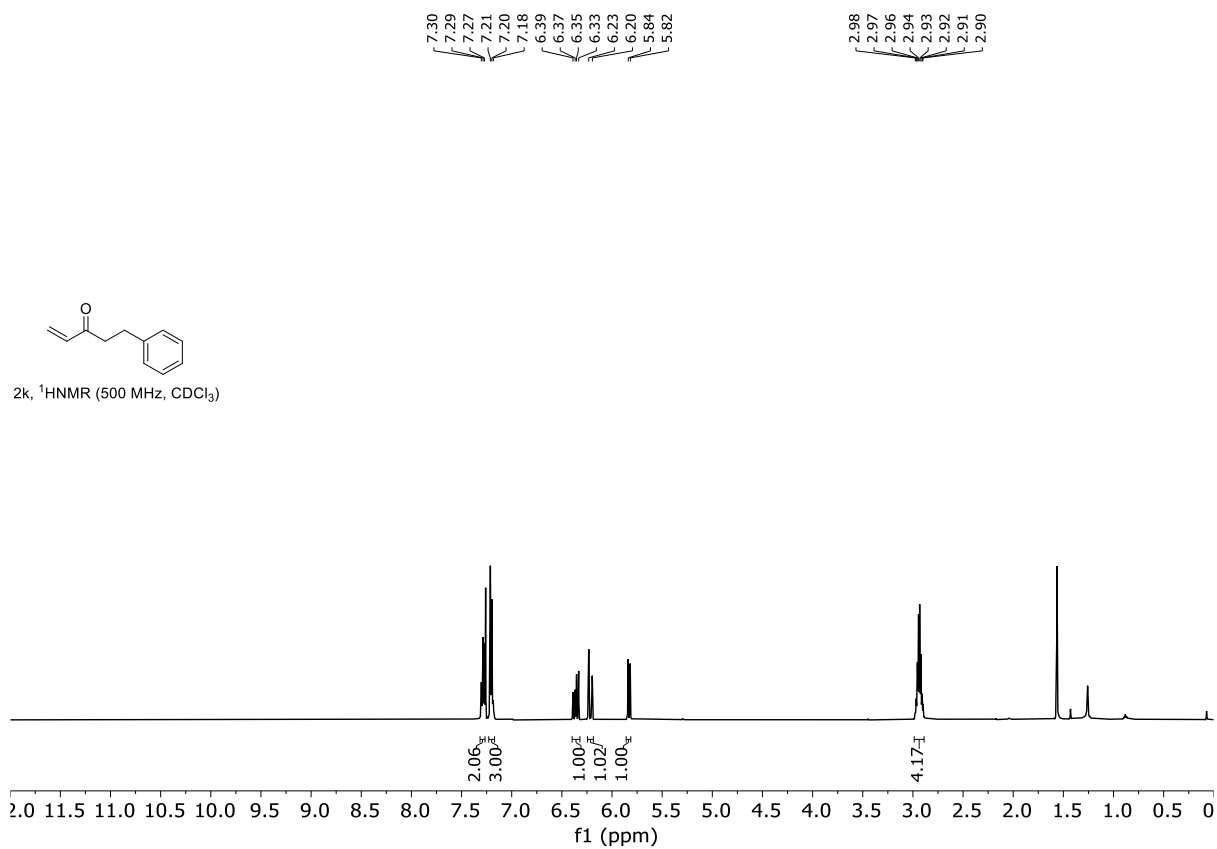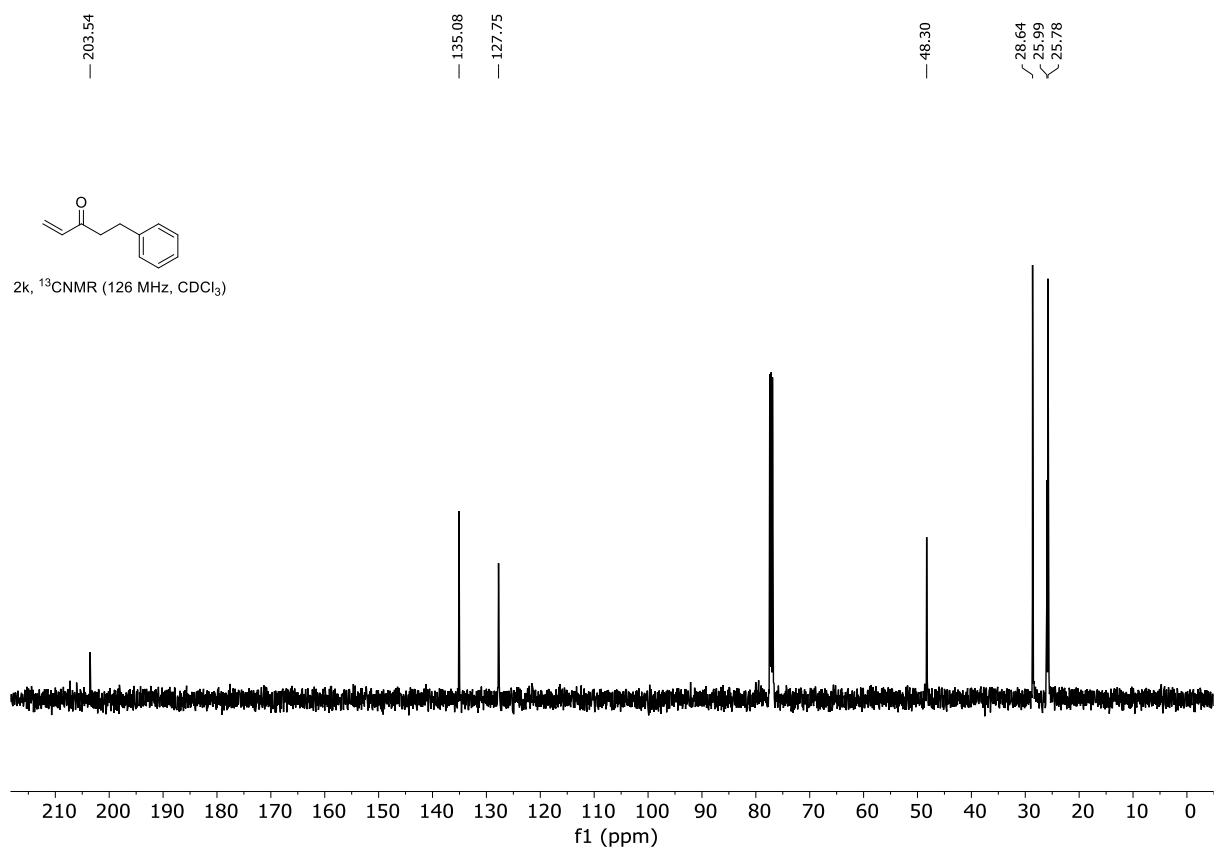

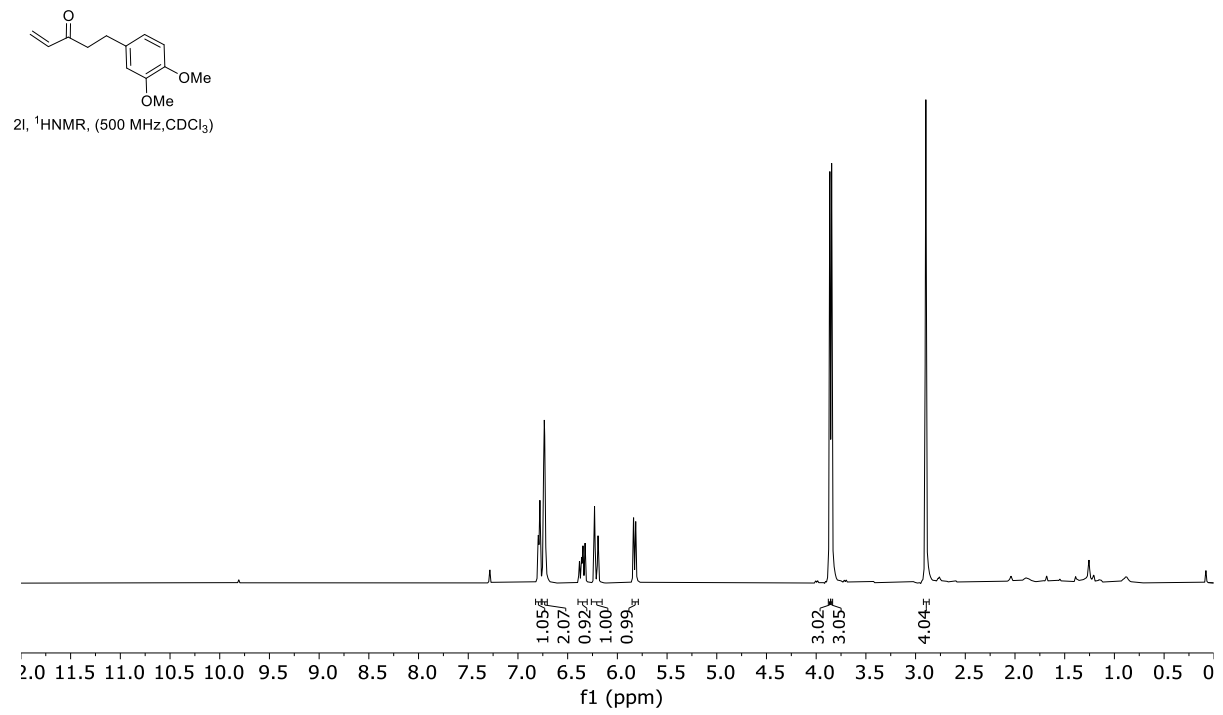

7.63  
7.63  
7.61  
7.61  
7.58  
7.57  
7.56  
7.56  
7.38  
7.38  
7.37  
7.37  
7.36  
7.36  
7.35  
7.35  
7.34  
7.33  
7.33  
7.32  
7.32  
7.32  
7.32  
7.31  
7.31  
7.30  
7.30  
7.29  
7.29  
6.44  
6.44  
6.41  
6.41  
6.34  
6.34  
6.31  
6.31  
5.82  
5.82  
5.90  
5.90  
3.24  
3.24  
3.23  
3.23  
3.23  
3.22  
3.22  
3.22  
3.21  
3.21  
3.20  
3.20  
3.20  
3.19  
3.19  
3.18  
3.18

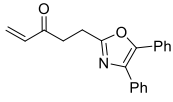

2m, <sup>1</sup>H NMR (500 MHz, CDCl<sub>3</sub>)

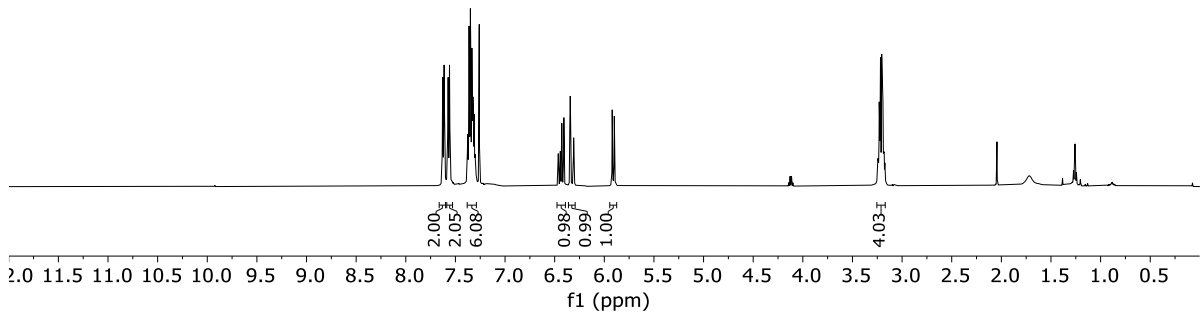

198.36  
162.43  
145.43  
136.28  
135.16  
132.54  
129.04  
128.82  
128.70  
128.62  
128.49  
128.12  
128.01  
126.51  
36.19  
22.21

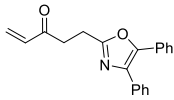

2m, <sup>13</sup>C NMR (126 MHz, CDCl<sub>3</sub>)

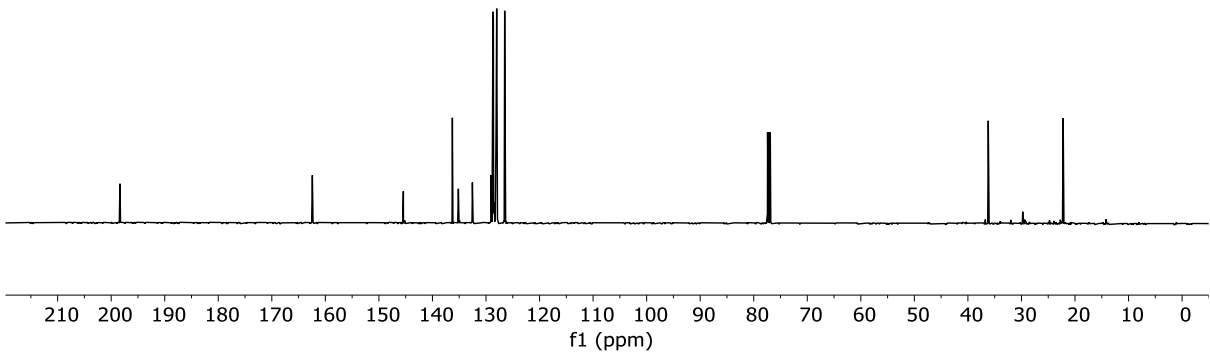

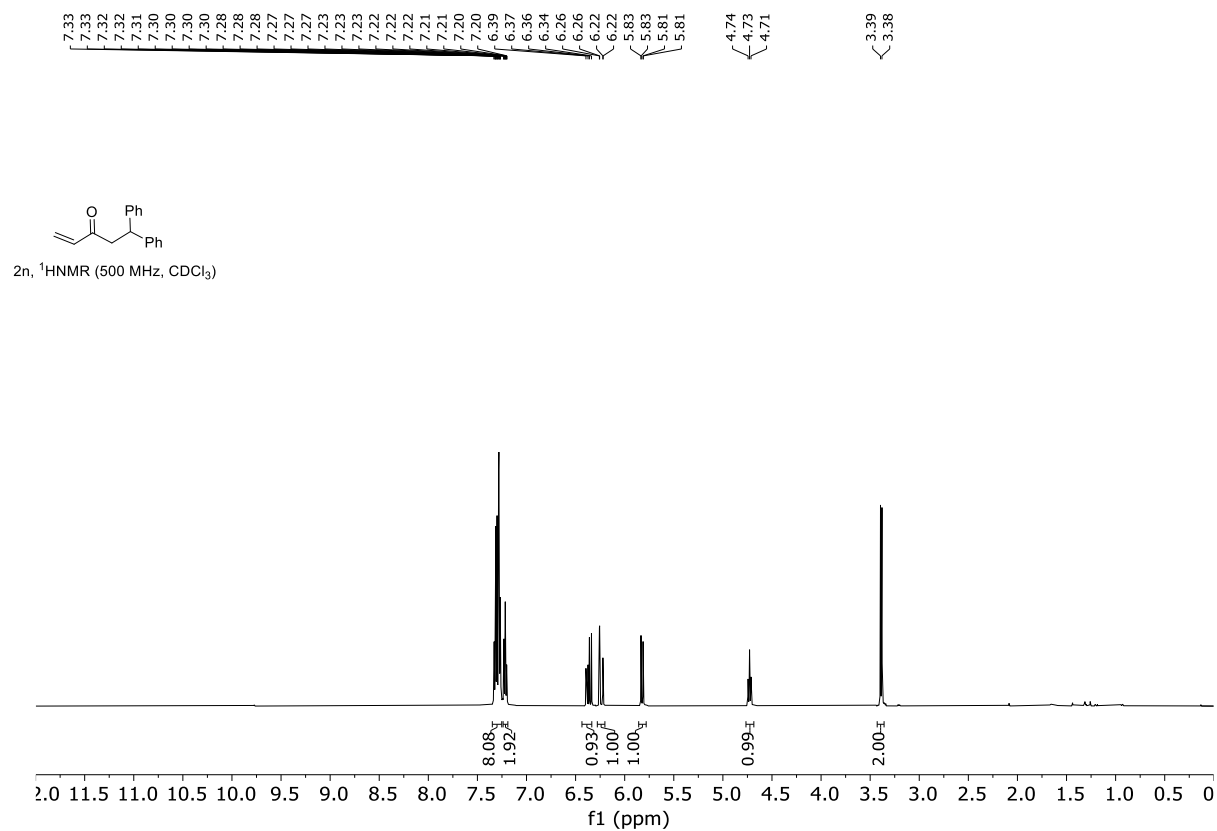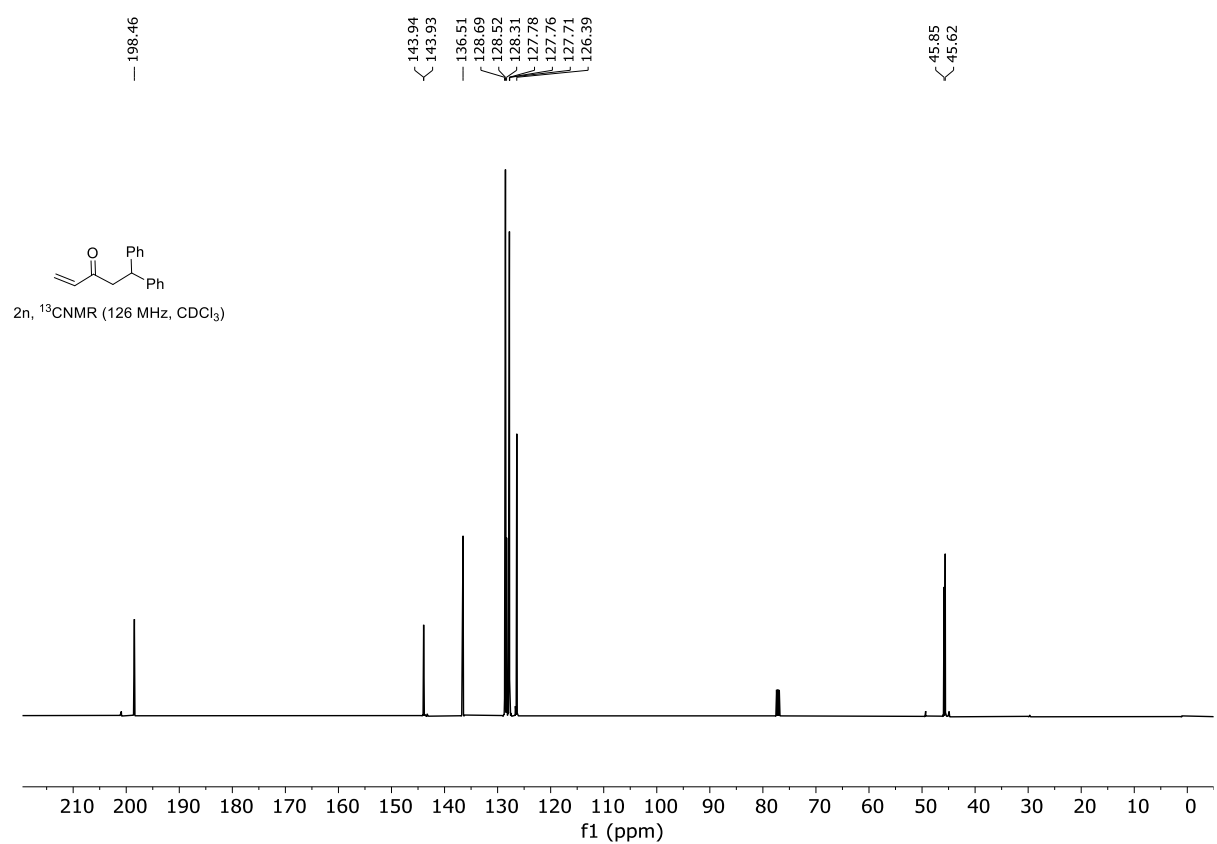

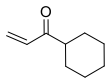

2o, <sup>1</sup>HNMR (500 MHz, CDCl<sub>3</sub>)

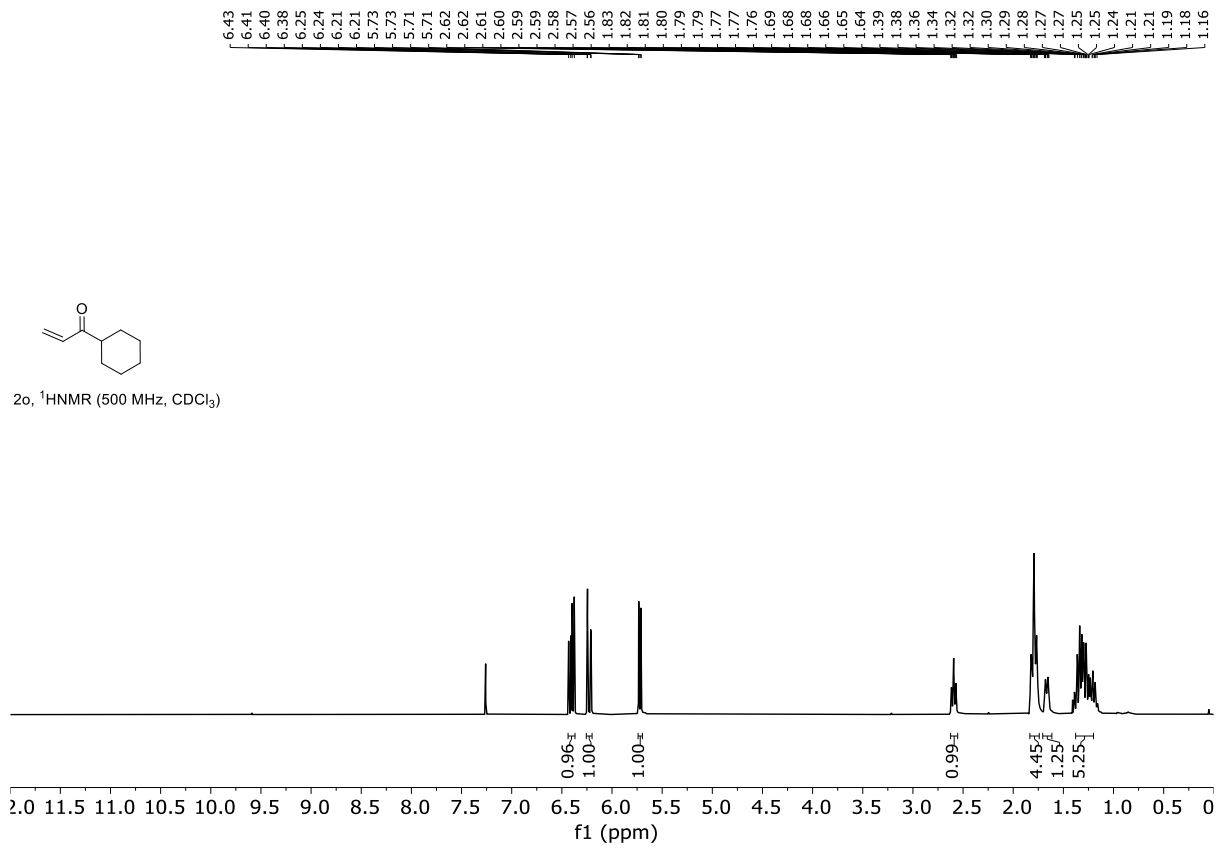

— 203.54

— 135.08

— 127.75

— 48.30

— 28.64

— 25.99

— 25.78

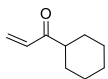

2o, <sup>13</sup>CNMR (126 MHz, CDCl<sub>3</sub>)

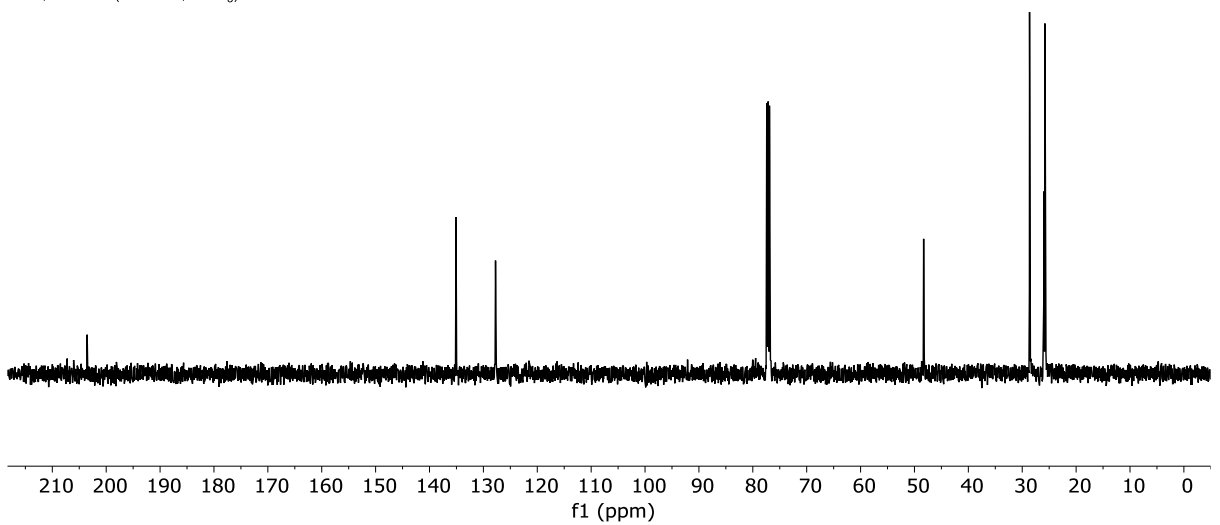

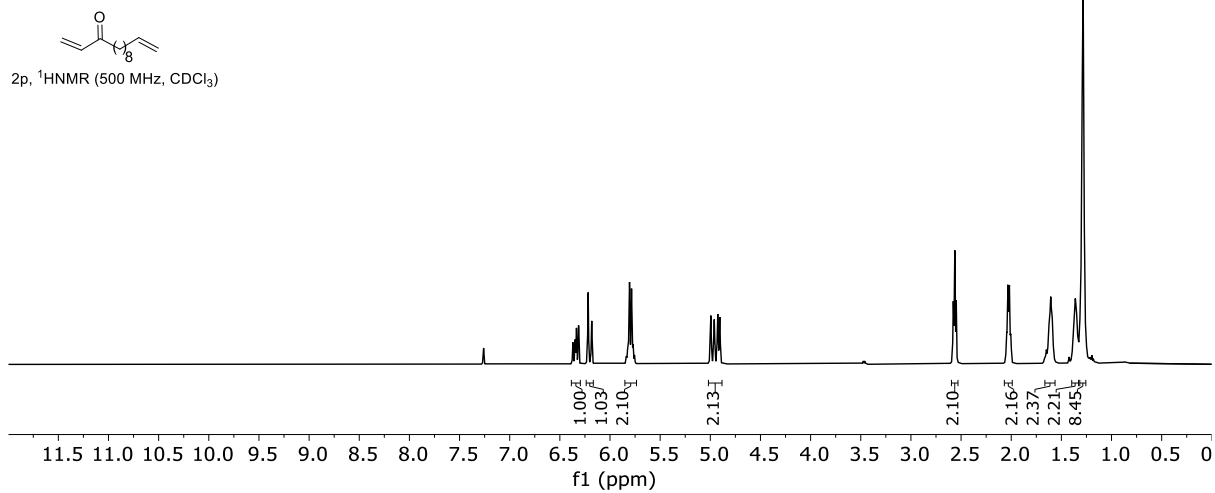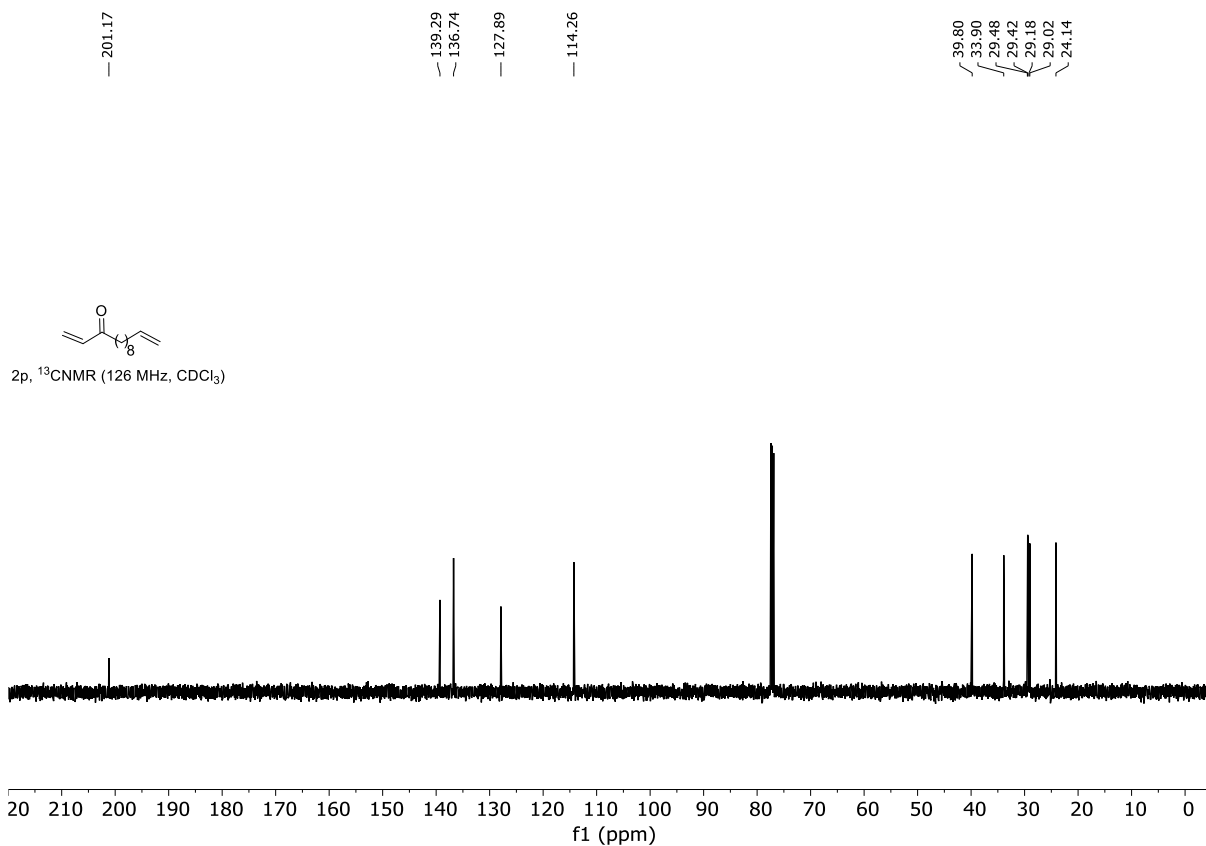

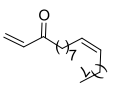  
 2q, <sup>1</sup>HNMR (500 MHz, CDCl<sub>3</sub>)

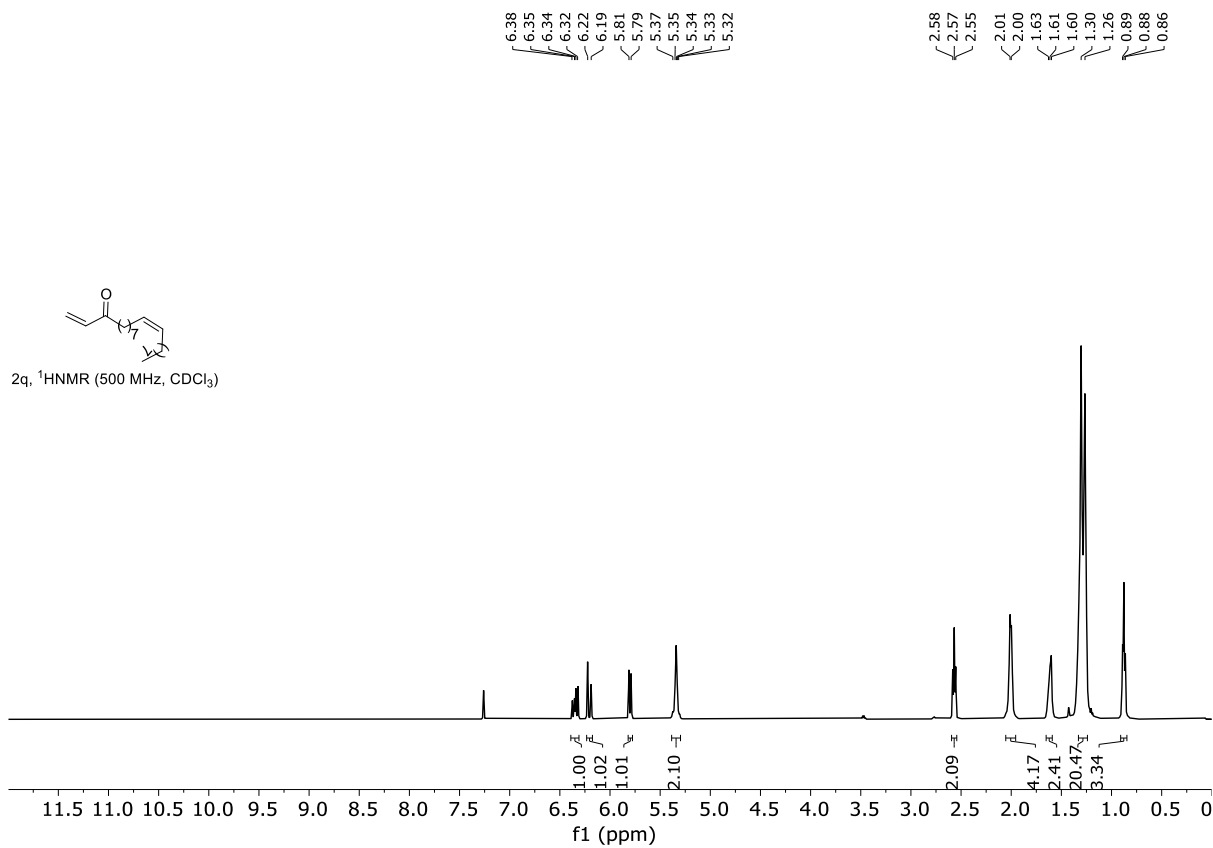

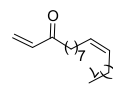  
 2q, <sup>13</sup>CNMR (126 MHz, CDCl<sub>3</sub>)

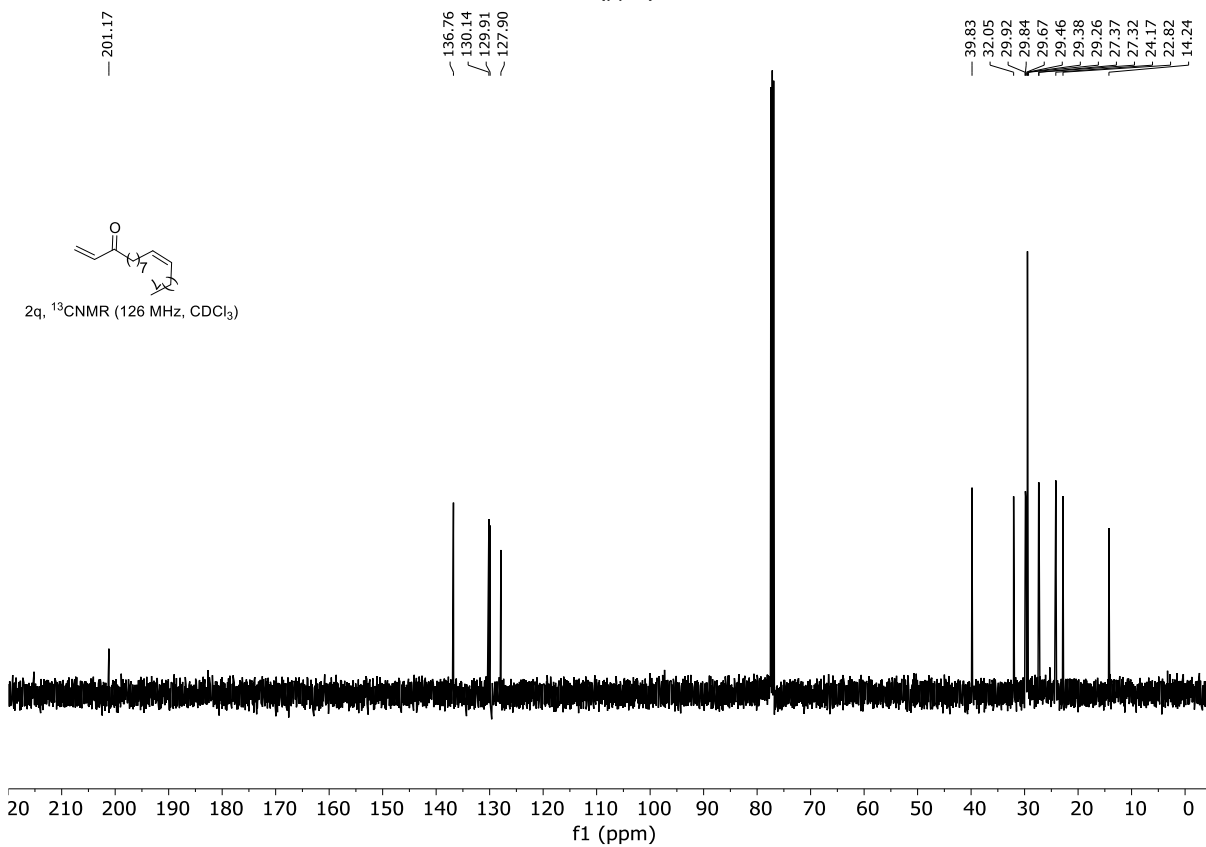

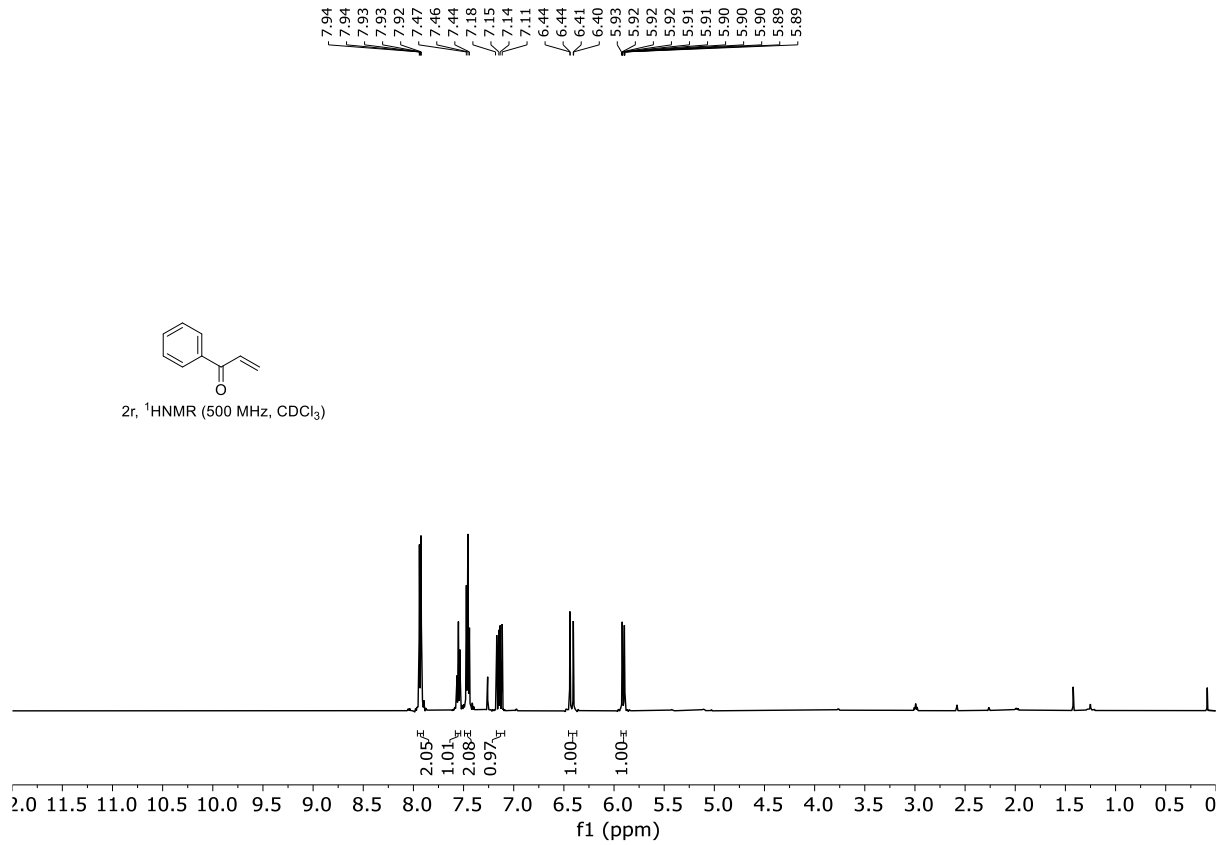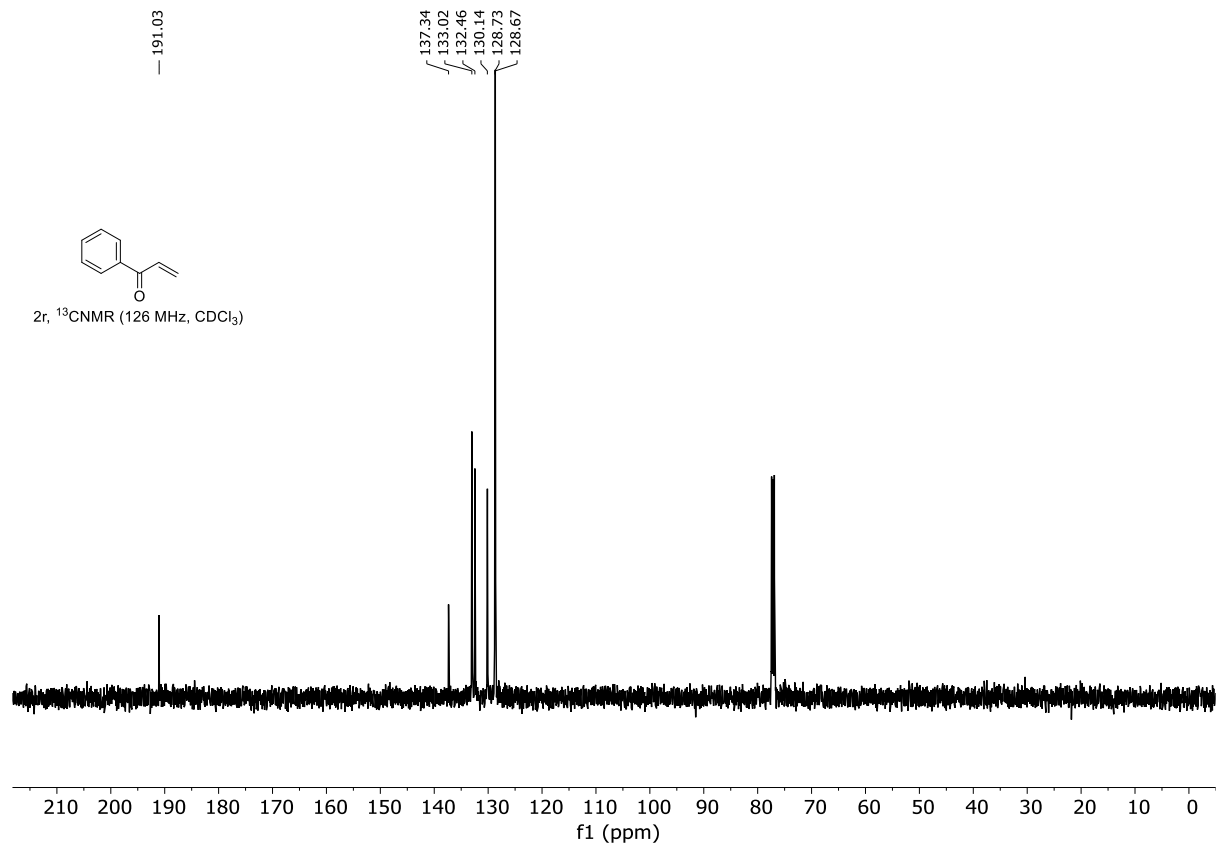



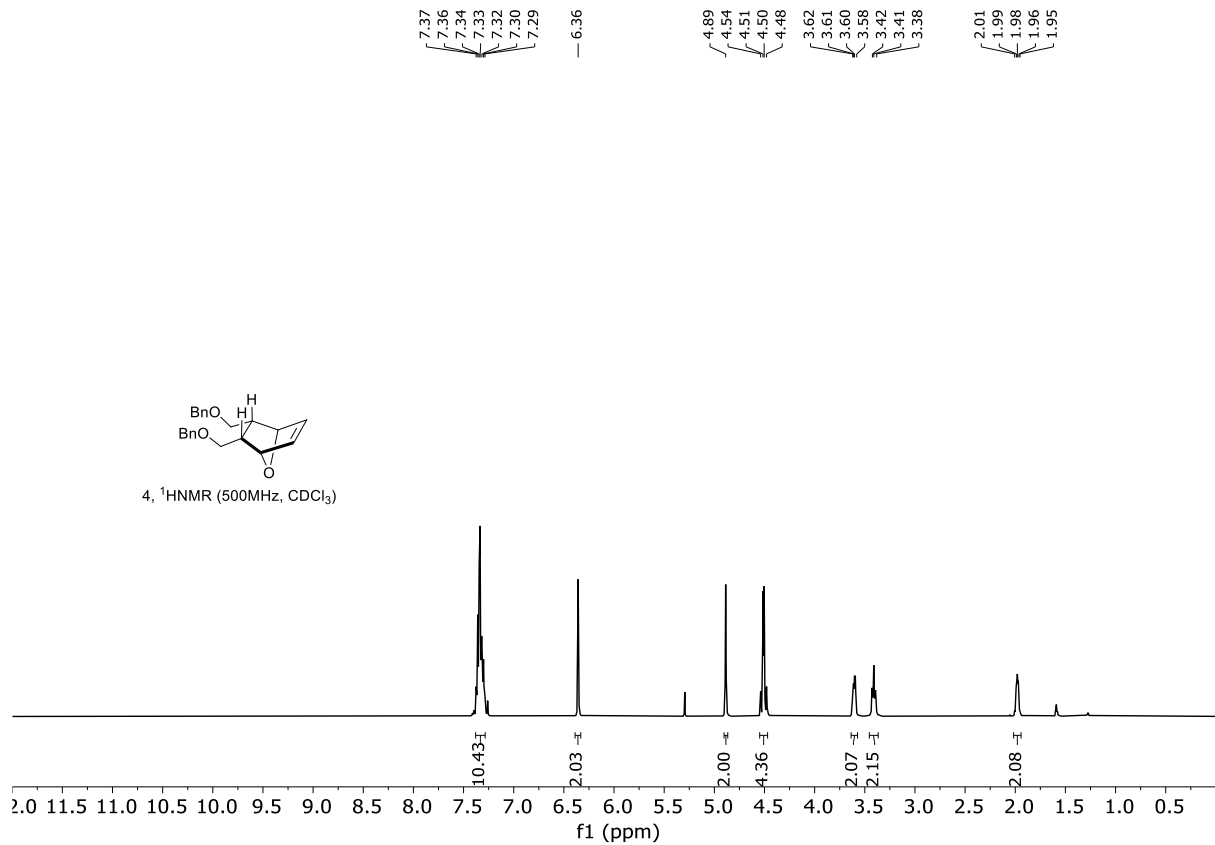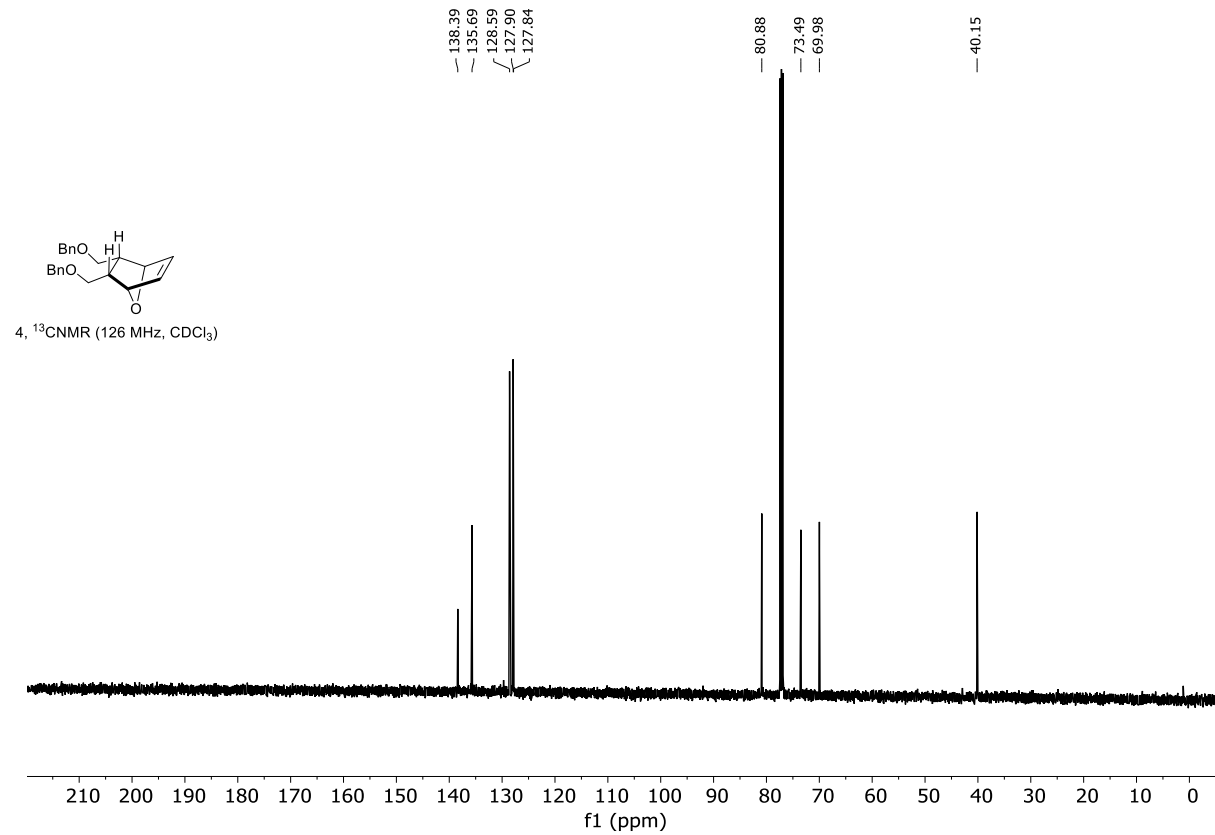

Supplement: d3cc02792a1.pdf [file d3cc02792a1.pdf]
